# Supplementary material for: Synthesis of meta-Aminophenol Derivatives via Cu-Catalyzed [1,3]-Rearrangement—Oxa-Michael Addition Cascade Reactions
Source: MDPI journal article supplement (doi:10.3390/molecules28104251), 2023-05-22

# Synthesis of *meta*-Aminophenol Derivatives by Cu-catalyzed [1,3]-Rearrangement - oxa-Michael Addition Cascade Reactions

Itaru Nakamura,<sup>1,\*</sup> Mai Tachibana,<sup>2</sup> Riku Konta,<sup>2</sup> Hiroki Tashiro,<sup>2</sup> and Masahiro Terada<sup>2</sup>

<sup>1</sup>Research and Analytical Center for Giant molecules, Graduate School of Science Tohoku University, Sendai 980-8578, Japan

<sup>2</sup>Department of Chemistry, Graduate School of Science, Tohoku University, Sendai 980-8578, Japan

## Supporting Information

|                          |     |
|--------------------------|-----|
| 1. General information   | S2  |
| 2. General procedure     | S3  |
| 3. Computational studies | S4  |
| 4. Analytical data       | S16 |
| 5. NMR charts            | S28 |

## 1. General information

$^1\text{H}$  and  $^{13}\text{C}$  NMR spectra were recorded on JEOL JNM-ECS400 (600 MHz for  $^1\text{H}$  and 100 MHz for  $^{13}\text{C}$ ) spectrometer. Chemical shifts are reported in ppm relative to  $\text{Me}_4\text{Si}$  (for  $^1\text{H}$ ,  $\delta$  0.00), and  $\text{CDCl}_3$  (for  $^{13}\text{C}$ ,  $\delta$  77.00).  $^1\text{H}$  NMR data are reported as follows: chemical shift, integration, multiplicity (s = singlet, d = doublet, t = triplet, q = quartet, sext = sextet, br = broad, m = multiplet) and coupling constants (Hz). Infrared (IR) spectra were recorded on a JASCO FT/IR- 4100 spectrometer. High-resolution mass spectra analysis was performed on a Bruker Daltonics APEX III FT-ICR-MS spectrometer and Bruker Daltonics solariX FT-ICR-MS spectrometer at the Instrumental Analysis Center for Chemistry, Graduate School of Science, Tohoku University. Flash column chromatography was performed on silica gel 60N (Merck 40-63  $\mu\text{m}$  or Kanto 40-50  $\mu\text{m}$ ). Analytical thin layer chromatography (TLC) was performed on Merck precoated TLC plates (silica gel 60 F254). All reactions were carried out under argon atmosphere.

## Materials

Anhydrous  $\text{PhCl}$  and 1,2-dichloroethane (DCE) were purchased from Aldrich and used as received.  $\text{IPrCuBr}$  was prepared in accordance with the literature method.<sup>[1]</sup> Substrates **1** were synthesized in accordance with the literature method.<sup>[1]</sup>  $\text{AgSbF}_6$  was purchased from Aldrich.

[1] Nakamura, I.; Jo, T.; Ishida, Y.; Tashiro, H.; Terada, M. *Org. Lett.* **2017**, *19*, 3059.

## 2. General procedure

General procedure for Cu-catalyzed reaction of **1** and alcohol **2**

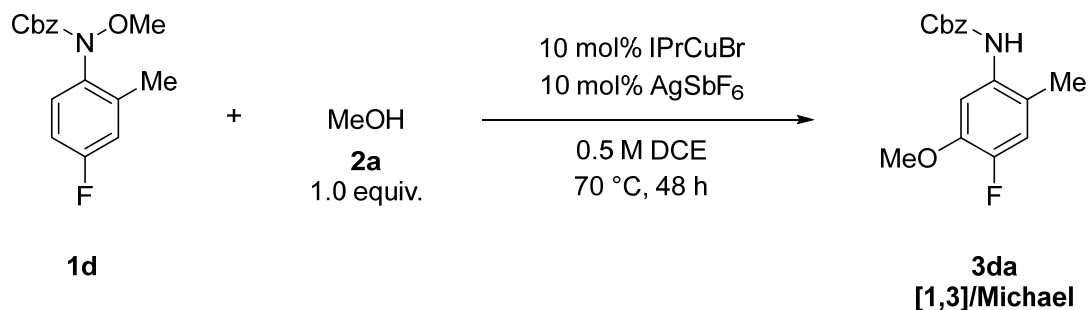

To a mixture of **1d** (144.8 mg, 0.5 mmol), IPrCuBr (26.6 mg, 0.05 mmol), AgSbF<sub>6</sub> (24.0 mg, 0.05 mmol), and methanol (**2a**) (20.3  $\mu$ L, 0.5 mmol) in a pressure vial was added DCE (1.0 mL) under argon atmosphere. After stirring at 70 °C for 48 h, the reaction mixture was passed through a short pad of silica gel with EtOAc (50 mL). Then, the solvent was evaporated in vacuo. The crude mixture was purified by silica gel flash column chromatography using hexane/EtOAc (20/1) as eluent to give **3da** (0.426 mmol 123.3 mg, 85%) in an analytically pure form.

### 3. Computational studies

#### 3-1 General

Computations were carried out using B3LYP as implemented in the GAUSSIAN 09 software package.<sup>1</sup> Copper atom was described with the SDD basis set<sup>2</sup> with the associated effective core potential and other atoms were described with 6-31G+(d,p) basis in the geometry optimization and frequency calculations. Transition states were found by a Berny algorithm after scanning potential energy surface from reactants. All transition states were verified by the intrinsic reaction coordinate (IRC) method.

<sup>1</sup> Gaussian 09, Revision C.01,

M. J. Frisch, G. W. Trucks, H. B. Schlegel, G. E. Scuseria, M. A. Robb, J. R. Cheeseman, G. Scalmani, V. Barone, B. Mennucci, G. A. Petersson, H. Nakatsuji, M. Caricato, X. Li, H. P. Hratchian, A. F. Izmaylov, J. Bloino, G. Zheng, J. L. Sonnenberg, M. Hada, M. Ehara, K. Toyota, R. Fukuda, J. Hasegawa, M. Ishida, T. Nakajima, Y. Honda, O. Kitao, H. Nakai, T. Vreven, J. A. Montgomery, Jr., J. E. Peralta, F. Ogliaro, M. Bearpark, J. J. Heyd, E. Brothers, K. N. Kudin, V. N. Staroverov, T. Keith, R. Kobayashi, J. Normand, K. Raghavachari, A. Rendell, J. C. Burant, S. S. Iyengar, J. Tomasi, M. Cossi, N. Rega, J. M. Millam, M. Klene, J. E. Knox, J. B. Cross, V. Bakken, C. Adamo, J. Jaramillo, R. Gomperts, R. E. Stratmann, O. Yazyev, A. J. Austin, R. Cammi, C. Pomelli, J. W. Ochterski, R. L. Martin, K. Morokuma, V. G. Zakrzewski, G. A. Voth, P. Salvador, J. J. Dannenberg, S. Dapprich, A. D. Daniels, O. Farkas, J. B. Foresman, J. V. Ortiz, J. Cioslowski, and D. J. Fox, Gaussian, Inc., Wallingford CT, 2010.

2. A. Bergner, M. Dolg, W. Kuechle, H. Stoll, H. Preuss, *Mol. Phys.*, 1993, **80**, 1431.

### 3-2. Calculated geometries and energies

**Figure S1.** Reaction coordinate for Cu-catalyzed [1,2]-rearrangement of *ortho*-quinol imine intermediate **10** of **1ba** at the level of B3LYP/SDD(Cu),6-31+(d,p)(others).

(c) energy diagram of the [1,2]-rearrangement process

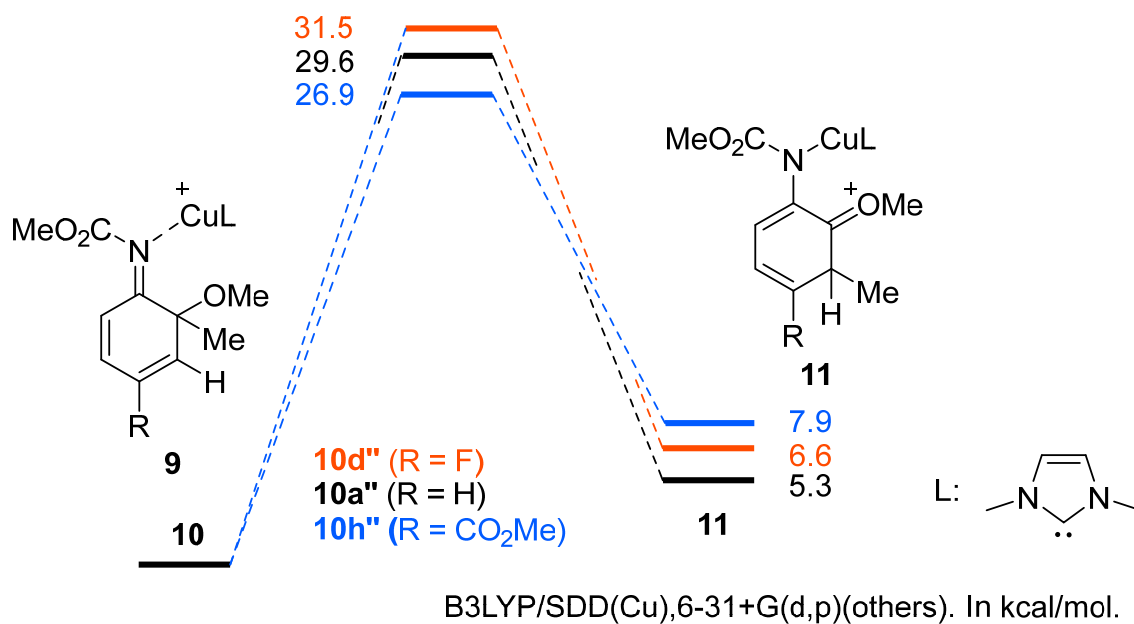

**Table S1.** Calculated energies of intermediates and transition states

| Compound                        | SCF energy / a.u. | E(ZPVE) / a.u. | H / a.u.     | G(298) / a.u. | Imaginary frequency<br>/cm <sup>-1</sup> |
|---------------------------------|-------------------|----------------|--------------|---------------|------------------------------------------|
| <b>10d''</b>                    | -1270.609516      | -1270.268073   | -1270.241336 | -1270.328190  | -                                        |
| <b>TS<sub>10d''-11d''</sub></b> | -1270.558807      | -1270.218957   | -1270.192600 | -1270.278000  | -580.87                                  |
| <b>11d''</b>                    | -1270.599974      | -1270.257867   | -1270.231149 | -1270.317702  | -                                        |
| <b>10a''</b>                    | -1171.375649      | -1171.025887   | -1171.000023 | -1171.084731  | -                                        |
| <b>TS<sub>10a''-11a''</sub></b> | -1171.328839      | -1170.980288   | -1170.954958 | -1171.037584  | -546.76                                  |
| <b>11a''</b>                    | -1171.363425      | -1171.013279   | -1170.987460 | -1171.072340  | -                                        |
| <b>10h''</b>                    | -1399.259952      | -1398.867469   | -1398.836961 | -1398.932699  | -                                        |
| <b>TS<sub>10h''-11h''</sub></b> | -1399.216875      | -1398.825783   | -1398.795699 | -1398.889809  | -527.82                                  |
| <b>11h''</b>                    | -1399.248730      | -1398.855667   | -1398.825344 | -1398.920072  | -                                        |

**Figure S2.** Geometry of the computed intermediates and transition states

**10d''**

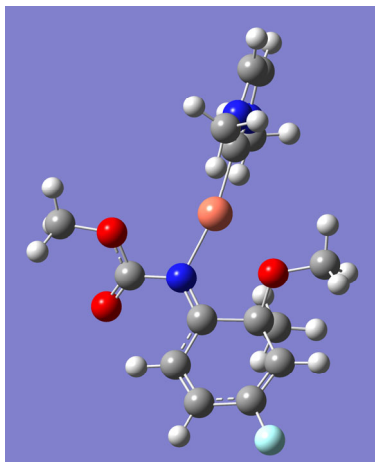

**TS<sub>10d''-11d''</sub>**

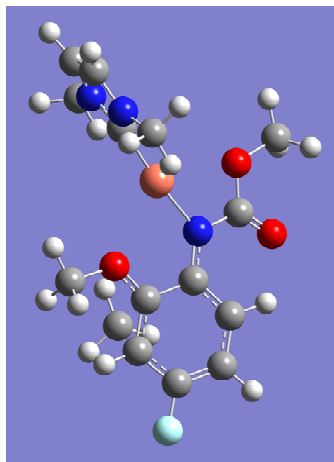

**11d''**

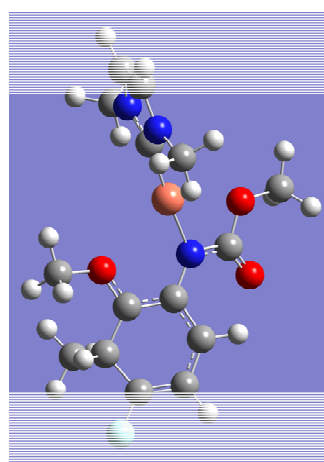

**10a''**

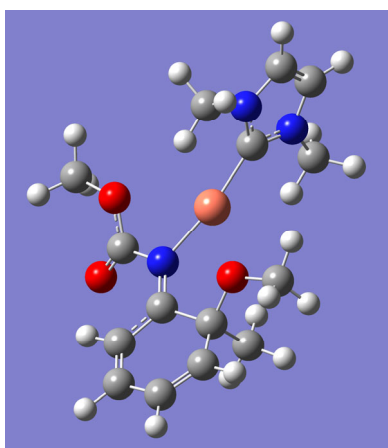

**TS<sub>10a''-11a''</sub>**

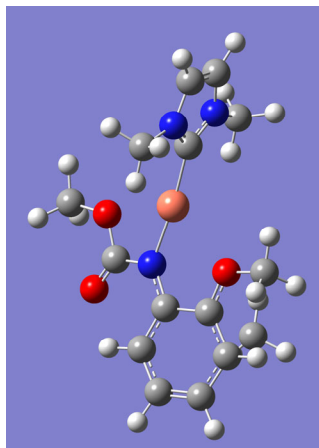

**11a''**

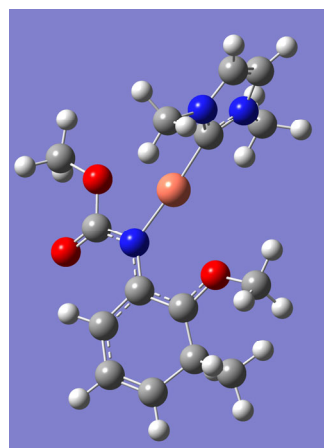

**10h''**

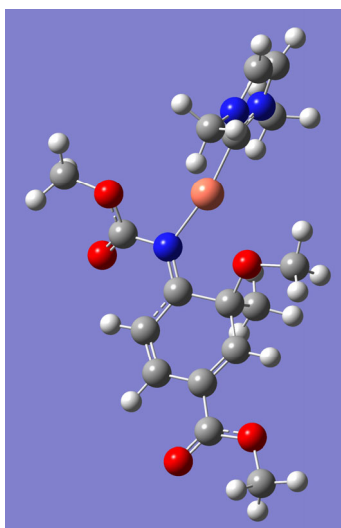

**TS<sub>10h''-11h''</sub>**

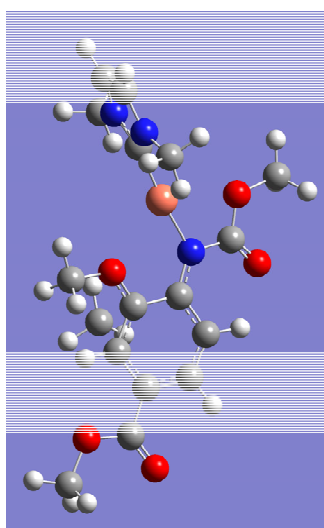

**11h''**

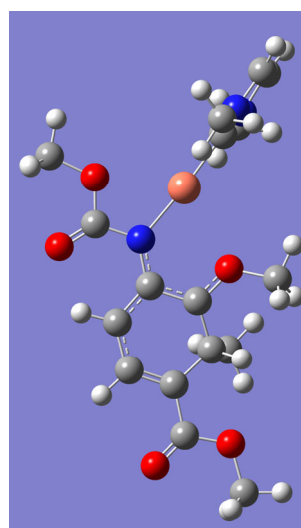

### 3-3. Cartesian Coordinates

10d”

| Center Number | Atomic Number | Atomic Type | Coordinates (Angstroms) |           |           |
|---------------|---------------|-------------|-------------------------|-----------|-----------|
|               |               |             | X                       | Y         | Z         |
| 1             | 6             | 0           | -4.880993               | -0.983386 | 0.457764  |
| 2             | 1             | 0           | -5.733385               | -1.152653 | 1.097405  |
| 3             | 6             | 0           | -4.748185               | -1.085941 | -0.891085 |
| 4             | 1             | 0           | -5.463177               | -1.359925 | -1.651408 |
| 5             | 7             | 0           | -3.646259               | -0.589791 | 0.949526  |
| 6             | 7             | 0           | -3.435302               | -0.754322 | -1.186648 |
| 7             | 6             | 0           | -2.739821               | -0.442750 | -0.056847 |
| 8             | 29            | 0           | -0.916088               | 0.110376  | 0.057203  |
| 9             | 6             | 0           | 1.994545                | -1.050692 | 0.418597  |
| 10            | 6             | 0           | 1.979807                | 0.463628  | 0.142497  |
| 11            | 6             | 0           | 3.241002                | 1.124588  | -0.118162 |
| 12            | 1             | 0           | 3.275101                | 2.204748  | -0.138308 |
| 13            | 6             | 0           | 4.348824                | 0.394251  | -0.412638 |
| 14            | 1             | 0           | 5.285082                | 0.882673  | -0.666577 |
| 15            | 6             | 0           | 4.315632                | -1.049041 | -0.426824 |
| 16            | 6             | 0           | 3.228396                | -1.753503 | -0.089732 |
| 17            | 1             | 0           | 3.257848                | -2.836798 | -0.074679 |
| 18            | 6             | 0           | 0.724128                | 2.483487  | 0.182418  |
| 19            | 8             | 0           | 1.491200                | 3.243590  | 0.731562  |
| 20            | 6             | 0           | 1.967101                | -1.190979 | 1.971499  |
| 21            | 1             | 0           | 1.047780                | -0.741940 | 2.358480  |
| 22            | 1             | 0           | 2.010320                | -2.243268 | 2.261417  |
| 23            | 1             | 0           | 2.825587                | -0.684465 | 2.420665  |
| 24            | 7             | 0           | 0.811670                | 1.056914  | 0.195854  |
| 25            | 8             | 0           | 0.786812                | -1.566428 | -0.163299 |
| 26            | 6             | 0           | 0.555981                | -2.980961 | -0.111698 |
| 27            | 1             | 0           | 1.219694                | -3.516999 | -0.797444 |
| 28            | 1             | 0           | 0.664147                | -3.378833 | 0.902491  |
| 29            | 1             | 0           | -0.475924               | -3.119304 | -0.436550 |
| 30            | 6             | 0           | -2.892662               | -0.720547 | -2.544324 |
| 31            | 1             | 0           | -3.419038               | 0.028121  | -3.142118 |
| 32            | 1             | 0           | -1.836158               | -0.457378 | -2.491119 |
| 33            | 1             | 0           | -2.997498               | -1.701150 | -3.015703 |
| 34            | 6             | 0           | -3.375115               | -0.360904 | 2.367774  |
| 35            | 1             | 0           | -3.497201               | -1.289574 | 2.931615  |
| 36            | 1             | 0           | -2.349776               | -0.006221 | 2.472227  |
| 37            | 1             | 0           | -4.057669               | 0.396222  | 2.761922  |
| 38            | 8             | 0           | -0.377368               | 2.845744  | -0.483448 |
| 39            | 6             | 0           | -0.636178               | 4.272302  | -0.545967 |
| 40            | 1             | 0           | 0.184025                | 4.778434  | -1.058296 |
| 41            | 1             | 0           | -1.563127               | 4.367069  | -1.108597 |
| 42            | 1             | 0           | -0.745969               | 4.674666  | 0.462771  |
| 43            | 9             | 0           | 5.458356                | -1.659389 | -0.799595 |

**TS<sub>10d''-11d</sub>**

| Center<br>Number | Atomic<br>Number | Atomic<br>Type | Coordinates (Angstroms) |           |           |
|------------------|------------------|----------------|-------------------------|-----------|-----------|
|                  |                  |                | X                       | Y         | Z         |
| 1                | 6                | 0              | -4.901896               | -1.172559 | 0.492807  |
| 2                | 1                | 0              | -5.735305               | -1.353623 | 1.153895  |
| 3                | 6                | 0              | -4.775348               | -1.356771 | -0.848062 |
| 4                | 1                | 0              | -5.477768               | -1.728022 | -1.578251 |
| 5                | 7                | 0              | -3.691485               | -0.665837 | 0.939355  |
| 6                | 7                | 0              | -3.490964               | -0.958043 | -1.183699 |
| 7                | 6                | 0              | -2.806055               | -0.524992 | -0.087403 |
| 8                | 29               | 0              | -1.044429               | 0.193144  | -0.021599 |
| 9                | 6                | 0              | 2.039746                | -0.935839 | 0.116315  |
| 10               | 6                | 0              | 1.930869                | 0.501931  | -0.159516 |
| 11               | 6                | 0              | 3.121184                | 1.131433  | -0.570002 |
| 12               | 1                | 0              | 3.079432                | 2.183916  | -0.809451 |
| 13               | 6                | 0              | 4.349229                | 0.457495  | -0.696125 |
| 14               | 1                | 0              | 5.227641                | 0.995119  | -1.038576 |
| 15               | 6                | 0              | 4.447813                | -0.877647 | -0.380349 |
| 16               | 6                | 0              | 3.322046                | -1.592038 | 0.064092  |
| 17               | 1                | 0              | 3.383911                | -2.670748 | 0.137060  |
| 18               | 6                | 0              | 0.585853                | 2.457803  | -0.008887 |
| 19               | 8                | 0              | 1.474655                | 3.294488  | -0.038630 |
| 20               | 6                | 0              | 2.913539                | -0.995442 | 1.925932  |
| 21               | 1                | 0              | 1.904236                | -0.915443 | 2.330530  |
| 22               | 1                | 0              | 3.429783                | -1.868256 | 2.319840  |
| 23               | 1                | 0              | 3.487624                | -0.078273 | 2.007255  |
| 24               | 7                | 0              | 0.697295                | 1.071267  | -0.019805 |
| 25               | 8                | 0              | 0.882483                | -1.609463 | 0.190749  |
| 26               | 6                | 0              | 0.863445                | -3.049806 | 0.225302  |
| 27               | 1                | 0              | 1.344018                | -3.466972 | -0.664282 |
| 28               | 1                | 0              | 1.340992                | -3.426789 | 1.135335  |
| 29               | 1                | 0              | -0.192524               | -3.315832 | 0.234357  |
| 30               | 6                | 0              | -2.968147               | -0.968776 | -2.548968 |
| 31               | 1                | 0              | -3.547779               | -0.290008 | -3.180109 |
| 32               | 1                | 0              | -1.930690               | -0.634992 | -2.524701 |
| 33               | 1                | 0              | -3.016075               | -1.979518 | -2.962780 |
| 34               | 6                | 0              | -3.425063               | -0.306583 | 2.330994  |
| 35               | 1                | 0              | -3.535822               | -1.182962 | 2.975211  |
| 36               | 1                | 0              | -2.404505               | 0.069974  | 2.401125  |
| 37               | 1                | 0              | -4.117459               | 0.473846  | 2.657162  |
| 38               | 8                | 0              | -0.729113               | 2.792737  | 0.069635  |
| 39               | 6                | 0              | -1.013237               | 4.208354  | 0.105547  |
| 40               | 1                | 0              | -0.637012               | 4.694025  | -0.797310 |
| 41               | 1                | 0              | -2.099023               | 4.280840  | 0.158339  |
| 42               | 1                | 0              | -0.551597               | 4.665936  | 0.983195  |
| 43               | 9                | 0              | 5.622707                | -1.540729 | -0.445168 |

11d''

| Center<br>Number | Atomic<br>Number | Atomic<br>Type | Coordinates (Angstroms) |           |           |
|------------------|------------------|----------------|-------------------------|-----------|-----------|
|                  |                  |                | X                       | Y         | Z         |
| 1                | 6                | 0              | 4.949906                | -1.262230 | -0.474708 |
| 2                | 1                | 0              | 5.765212                | -1.477404 | -1.148031 |
| 3                | 6                | 0              | 4.848277                | -1.409625 | 0.872966  |
| 4                | 1                | 0              | 5.558018                | -1.777881 | 1.597551  |
| 5                | 7                | 0              | 3.741330                | -0.741103 | -0.908847 |
| 6                | 7                | 0              | 3.580468                | -0.974076 | 1.224980  |
| 7                | 6                | 0              | 2.881521                | -0.554478 | 0.132463  |
| 8                | 29               | 0              | 1.139161                | 0.204044  | 0.070877  |
| 9                | 6                | 0              | -2.039693               | -0.849641 | -0.114646 |
| 10               | 6                | 0              | -1.831817               | 0.516608  | 0.197814  |
| 11               | 6                | 0              | -2.947981               | 1.178243  | 0.757153  |
| 12               | 1                | 0              | -2.793956               | 2.191598  | 1.104584  |
| 13               | 6                | 0              | -4.245403               | 0.616936  | 0.919902  |
| 14               | 1                | 0              | -5.040747               | 1.196709  | 1.374733  |
| 15               | 6                | 0              | -4.449411               | -0.655705 | 0.516941  |
| 16               | 6                | 0              | -3.405111               | -1.468110 | -0.152335 |
| 17               | 1                | 0              | -3.392330               | -2.466537 | 0.303319  |
| 18               | 6                | 0              | -0.511913               | 2.448850  | -0.114943 |
| 19               | 8                | 0              | -1.438567               | 3.251681  | -0.171898 |
| 20               | 6                | 0              | -3.842077               | -1.626659 | -1.661797 |
| 21               | 1                | 0              | -3.116939               | -2.218691 | -2.220494 |
| 22               | 1                | 0              | -4.811568               | -2.127112 | -1.696027 |
| 23               | 1                | 0              | -3.926098               | -0.643397 | -2.129377 |
| 24               | 7                | 0              | -0.579506               | 1.082813  | 0.043114  |
| 25               | 8                | 0              | -0.979829               | -1.557094 | -0.468674 |
| 26               | 6                | 0              | -0.970410               | -3.003468 | -0.488806 |
| 27               | 1                | 0              | -1.273074               | -3.394725 | 0.486632  |
| 28               | 1                | 0              | -1.611680               | -3.395680 | -1.279248 |
| 29               | 1                | 0              | 0.065781                | -3.270496 | -0.689267 |
| 30               | 6                | 0              | 3.084390                | -0.942801 | 2.599606  |
| 31               | 1                | 0              | 3.705025                | -0.280689 | 3.209035  |
| 32               | 1                | 0              | 2.062351                | -0.563933 | 2.588624  |
| 33               | 1                | 0              | 3.096347                | -1.948523 | 3.028222  |
| 34               | 6                | 0              | 3.453897                | -0.405698 | -2.302626 |
| 35               | 1                | 0              | 3.560703                | -1.292483 | -2.932985 |
| 36               | 1                | 0              | 2.430398                | -0.035853 | -2.365519 |
| 37               | 1                | 0              | 4.137748                | 0.372576  | -2.651323 |
| 38               | 8                | 0              | 0.788099                | 2.832436  | -0.233172 |
| 39               | 6                | 0              | 1.010191                | 4.245610  | -0.422608 |
| 40               | 1                | 0              | 0.614337                | 4.811325  | 0.423672  |
| 41               | 1                | 0              | 2.092055                | 4.359101  | -0.487322 |
| 42               | 1                | 0              | 0.530878                | 4.587138  | -1.342660 |
| 43               | 9                | 0              | -5.638666               | -1.255439 | 0.628825  |

10a''

| Center<br>Number | Atomic<br>Number | Atomic<br>Type | Coordinates (Angstroms) |           |           |
|------------------|------------------|----------------|-------------------------|-----------|-----------|
|                  |                  |                | X                       | Y         | Z         |
| 1                | 6                | 0              | -4.703747               | -0.651881 | 0.550910  |
| 2                | 1                | 0              | -5.538263               | -0.806972 | 1.217140  |
| 3                | 6                | 0              | -4.644617               | -0.620735 | -0.806686 |
| 4                | 1                | 0              | -5.418035               | -0.742086 | -1.549289 |
| 5                | 7                | 0              | -3.413765               | -0.434357 | 1.009314  |
| 6                | 7                | 0              | -3.319935               | -0.386271 | -1.140678 |
| 7                | 6                | 0              | -2.544489               | -0.266310 | -0.026378 |
| 8                | 29               | 0              | -0.672949               | 0.100576  | 0.041731  |
| 9                | 6                | 0              | 2.128266                | -1.347047 | 0.227046  |
| 10               | 6                | 0              | 2.246656                | 0.171600  | 0.030218  |
| 11               | 6                | 0              | 3.556134                | 0.714748  | -0.236977 |
| 12               | 1                | 0              | 3.695570                | 1.786155  | -0.206172 |
| 13               | 6                | 0              | 4.578739                | -0.107447 | -0.605596 |
| 14               | 1                | 0              | 5.538660                | 0.334639  | -0.858443 |
| 15               | 6                | 0              | 4.433070                | -1.544490 | -0.712241 |
| 16               | 6                | 0              | 3.270305                | -2.129340 | -0.370243 |
| 17               | 1                | 0              | 3.155984                | -3.207378 | -0.421284 |
| 18               | 6                | 0              | 1.190817                | 2.292673  | 0.235558  |
| 19               | 8                | 0              | 2.052308                | 2.946145  | 0.783032  |
| 20               | 6                | 0              | 2.172115                | -1.565416 | 1.772596  |
| 21               | 1                | 0              | 1.324515                | -1.046930 | 2.229946  |
| 22               | 1                | 0              | 2.121037                | -2.630255 | 2.011309  |
| 23               | 1                | 0              | 3.099829                | -1.169695 | 2.193930  |
| 24               | 7                | 0              | 1.140304                | 0.869241  | 0.159830  |
| 25               | 8                | 0              | 0.848108                | -1.724268 | -0.303889 |
| 26               | 6                | 0              | 0.493657                | -3.112803 | -0.314746 |
| 27               | 1                | 0              | 1.039360                | -3.656754 | -1.092492 |
| 28               | 1                | 0              | 0.657525                | -3.588187 | 0.657990  |
| 29               | 1                | 0              | -0.572365               | -3.140672 | -0.544342 |
| 30               | 6                | 0              | -2.839311               | -0.260388 | -2.515994 |
| 31               | 1                | 0              | -3.309030               | 0.598480  | -3.002539 |
| 32               | 1                | 0              | -1.759359               | -0.113511 | -2.495374 |
| 33               | 1                | 0              | -3.069708               | -1.168321 | -3.079336 |
| 34               | 6                | 0              | -3.054843               | -0.383767 | 2.425454  |
| 35               | 1                | 0              | -3.270036               | -1.342447 | 2.904880  |
| 36               | 1                | 0              | -1.988823               | -0.171001 | 2.505355  |
| 37               | 1                | 0              | -3.616780               | 0.407954  | 2.927551  |
| 38               | 8                | 0              | 0.095609                | 2.800044  | -0.344894 |
| 39               | 6                | 0              | -0.026064               | 4.244298  | -0.304178 |
| 40               | 1                | 0              | 0.812168                | 4.705428  | -0.829855 |
| 41               | 1                | 0              | -0.966878               | 4.463785  | -0.805954 |
| 42               | 1                | 0              | -0.044854               | 4.587680  | 0.731887  |
| 43               | 1                | 0              | 5.270458                | -2.134435 | -1.070822 |

**TS<sub>10a</sub>"-11a"**

| Center<br>Number | Atomic<br>Number | Atomic<br>Type | Coordinates (Angstroms) |           |           |
|------------------|------------------|----------------|-------------------------|-----------|-----------|
|                  |                  |                | X                       | Y         | Z         |
| 1                | 6                | 0              | -4.731548               | -0.849225 | 0.544570  |
| 2                | 1                | 0              | -5.561535               | -0.988106 | 1.220008  |
| 3                | 6                | 0              | -4.654154               | -0.980158 | -0.806238 |
| 4                | 1                | 0              | -5.403968               | -1.254251 | -1.532203 |
| 5                | 7                | 0              | -3.470775               | -0.470892 | 0.979110  |
| 6                | 7                | 0              | -3.348160               | -0.678768 | -1.159630 |
| 7                | 6                | 0              | -2.601329               | -0.358894 | -0.064832 |
| 8                | 29               | 0              | -0.781682               | 0.198110  | -0.019108 |
| 9                | 6                | 0              | 2.185127                | -1.203237 | 0.013853  |
| 10               | 6                | 0              | 2.205909                | 0.250530  | -0.209327 |
| 11               | 6                | 0              | 3.446221                | 0.779412  | -0.607040 |
| 12               | 1                | 0              | 3.503238                | 1.838392  | -0.811660 |
| 13               | 6                | 0              | 4.597376                | -0.015161 | -0.765547 |
| 14               | 1                | 0              | 5.506085                | 0.469257  | -1.110800 |
| 15               | 6                | 0              | 4.608567                | -1.370700 | -0.491568 |
| 16               | 6                | 0              | 3.401611                | -1.967546 | -0.057251 |
| 17               | 1                | 0              | 3.332162                | -3.047708 | -0.007737 |
| 18               | 6                | 0              | 1.038417                | 2.311949  | 0.008504  |
| 19               | 8                | 0              | 1.993494                | 3.071531  | -0.014519 |
| 20               | 6                | 0              | 3.064400                | -1.407239 | 1.810176  |
| 21               | 1                | 0              | 2.071169                | -1.232342 | 2.225020  |
| 22               | 1                | 0              | 3.484002                | -2.339118 | 2.182182  |
| 23               | 1                | 0              | 3.731998                | -0.558657 | 1.916826  |
| 24               | 7                | 0              | 1.029900                | 0.921323  | -0.036464 |
| 25               | 8                | 0              | 0.967689                | -1.763202 | 0.079962  |
| 26               | 6                | 0              | 0.807455                | -3.194080 | 0.061566  |
| 27               | 1                | 0              | 1.245884                | -3.623921 | -0.843578 |
| 28               | 1                | 0              | 1.244753                | -3.649616 | 0.955741  |
| 29               | 1                | 0              | -0.269700               | -3.354977 | 0.063629  |
| 30               | 6                | 0              | -2.860257               | -0.673753 | -2.537731 |
| 31               | 1                | 0              | -3.397620               | 0.075219  | -3.125369 |
| 32               | 1                | 0              | -1.798820               | -0.425559 | -2.527906 |
| 33               | 1                | 0              | -2.999520               | -1.659094 | -2.990426 |
| 34               | 6                | 0              | -3.140648               | -0.200738 | 2.377152  |
| 35               | 1                | 0              | -3.316296               | -1.091954 | 2.985635  |
| 36               | 1                | 0              | -2.088521               | 0.078313  | 2.435964  |
| 37               | 1                | 0              | -3.750974               | 0.623552  | 2.755260  |
| 38               | 8                | 0              | -0.243051               | 2.755662  | 0.114753  |
| 39               | 6                | 0              | -0.403509               | 4.188597  | 0.190507  |
| 40               | 1                | 0              | 0.001376                | 4.663924  | -0.705487 |
| 41               | 1                | 0              | -1.478207               | 4.353057  | 0.261859  |
| 42               | 1                | 0              | 0.107499                | 4.581916  | 1.071985  |
| 43               | 1                | 0              | 5.502121                | -1.975596 | -0.588246 |

11a”

| Center<br>Number | Atomic<br>Number | Atomic<br>Type | Coordinates (Angstroms) |           |           |
|------------------|------------------|----------------|-------------------------|-----------|-----------|
|                  |                  |                | X                       | Y         | Z         |
| 1                | 6                | 0              | -4.698520               | -1.125390 | 0.590079  |
| 2                | 1                | 0              | -5.473239               | -1.411632 | 1.284522  |
| 3                | 6                | 0              | -4.708117               | -1.042738 | -0.766810 |
| 4                | 1                | 0              | -5.492698               | -1.243692 | -1.479855 |
| 5                | 7                | 0              | -3.429326               | -0.749380 | 1.001099  |
| 6                | 7                | 0              | -3.444823               | -0.618003 | -1.147216 |
| 7                | 6                | 0              | -2.639673               | -0.429278 | -0.063254 |
| 8                | 29               | 0              | -0.852683               | 0.221376  | -0.036373 |
| 9                | 6                | 0              | 2.215568                | -1.043098 | -0.107893 |
| 10               | 6                | 0              | 2.137871                | 0.377116  | -0.205262 |
| 11               | 6                | 0              | 3.346467                | 0.999736  | -0.581803 |
| 12               | 1                | 0              | 3.312645                | 2.067014  | -0.758101 |
| 13               | 6                | 0              | 4.592025                | 0.323797  | -0.751863 |
| 14               | 1                | 0              | 5.453491                | 0.910110  | -1.055243 |
| 15               | 6                | 0              | 4.697700                | -1.008953 | -0.535024 |
| 16               | 6                | 0              | 3.512603                | -1.783654 | -0.081960 |
| 17               | 1                | 0              | 3.425474                | -2.698443 | -0.684004 |
| 18               | 6                | 0              | 0.898511                | 2.371860  | 0.149188  |
| 19               | 8                | 0              | 1.840946                | 3.152753  | 0.215802  |
| 20               | 6                | 0              | 3.795266                | -2.232906 | 1.407370  |
| 21               | 1                | 0              | 2.958236                | -2.794092 | 1.825218  |
| 22               | 1                | 0              | 4.684145                | -2.866930 | 1.423498  |
| 23               | 1                | 0              | 3.974303                | -1.354830 | 2.031225  |
| 24               | 7                | 0              | 0.921470                | 1.004368  | -0.029862 |
| 25               | 8                | 0              | 1.072675                | -1.688481 | 0.040184  |
| 26               | 6                | 0              | 0.933930                | -3.115079 | -0.159429 |
| 27               | 1                | 0              | 1.309944                | -3.392955 | -1.147837 |
| 28               | 1                | 0              | 1.445820                | -3.677823 | 0.621780  |
| 29               | 1                | 0              | -0.138306               | -3.295988 | -0.105136 |
| 30               | 6                | 0              | -3.052751               | -0.375097 | -2.534456 |
| 31               | 1                | 0              | -3.676266               | 0.410291  | -2.969566 |
| 32               | 1                | 0              | -2.011613               | -0.052329 | -2.547490 |
| 33               | 1                | 0              | -3.158573               | -1.290758 | -3.122427 |
| 34               | 6                | 0              | -3.017253               | -0.674789 | 2.401695  |
| 35               | 1                | 0              | -3.137260               | -1.649521 | 2.882116  |
| 36               | 1                | 0              | -1.968889               | -0.378295 | 2.438225  |
| 37               | 1                | 0              | -3.618125               | 0.068136  | 2.932796  |
| 38               | 8                | 0              | -0.392956               | 2.787540  | 0.273980  |
| 39               | 6                | 0              | -0.578084               | 4.202605  | 0.486096  |
| 40               | 1                | 0              | -0.169843               | 4.770780  | -0.352661 |
| 41               | 1                | 0              | -1.656478               | 4.342881  | 0.556411  |
| 42               | 1                | 0              | -0.087263               | 4.517305  | 1.409642  |
| 43               | 1                | 0              | 5.642484                | -1.537313 | -0.616199 |

10h''

| Center<br>Number | Atomic<br>Number | Atomic<br>Type | Coordinates (Angstroms) |           |           |
|------------------|------------------|----------------|-------------------------|-----------|-----------|
|                  |                  |                | X                       | Y         | Z         |
| 1                | 6                | 0              | -5.303997               | -1.838365 | 0.325639  |
| 2                | 1                | 0              | -6.137597               | -2.153424 | 0.934082  |
| 3                | 6                | 0              | -5.073024               | -1.979595 | -1.006467 |
| 4                | 1                | 0              | -5.667740               | -2.439678 | -1.780434 |
| 5                | 7                | 0              | -4.211398               | -1.164558 | 0.848599  |
| 6                | 7                | 0              | -3.844761               | -1.389789 | -1.260740 |
| 7                | 6                | 0              | -3.298776               | -0.878488 | -0.121759 |
| 8                | 29               | 0              | -1.647297               | 0.062496  | 0.046968  |
| 9                | 6                | 0              | 1.422114                | -0.413776 | 0.662092  |
| 10               | 6                | 0              | 1.096463                | 1.036931  | 0.279437  |
| 11               | 6                | 0              | 2.204877                | 1.937021  | 0.064769  |
| 12               | 1                | 0              | 2.010528                | 2.996919  | -0.022467 |
| 13               | 6                | 0              | 3.463788                | 1.452529  | -0.106959 |
| 14               | 1                | 0              | 4.284163                | 2.128899  | -0.327241 |
| 15               | 6                | 0              | 3.773796                | 0.033918  | -0.050173 |
| 16               | 6                | 0              | 2.806136                | -0.852024 | 0.261832  |
| 17               | 1                | 0              | 3.036491                | -1.909635 | 0.323896  |
| 18               | 6                | 0              | -0.560752               | 2.730380  | 0.102121  |
| 19               | 8                | 0              | -0.039064               | 3.661364  | 0.675244  |
| 20               | 6                | 0              | 1.360193                | -0.454393 | 2.222545  |
| 21               | 1                | 0              | 0.346654                | -0.196097 | 2.542492  |
| 22               | 1                | 0              | 1.618127                | -1.449105 | 2.592661  |
| 23               | 1                | 0              | 2.062410                | 0.261219  | 2.657786  |
| 24               | 7                | 0              | -0.173787               | 1.360400  | 0.215152  |
| 25               | 8                | 0              | 0.390334                | -1.227364 | 0.085951  |
| 26               | 6                | 0              | 0.466760                | -2.650113 | 0.246664  |
| 27               | 1                | 0              | 1.253772                | -3.080487 | -0.380826 |
| 28               | 1                | 0              | 0.621421                | -2.939864 | 1.291099  |
| 29               | 1                | 0              | -0.499323               | -3.032625 | -0.085135 |
| 30               | 6                | 0              | -3.243466               | -1.307708 | -2.591324 |
| 31               | 1                | 0              | -3.872015               | -0.705700 | -3.252797 |
| 32               | 1                | 0              | -2.264085               | -0.837249 | -2.502973 |
| 33               | 1                | 0              | -3.126696               | -2.309301 | -3.012998 |
| 34               | 6                | 0              | -4.079864               | -0.803493 | 2.259034  |
| 35               | 1                | 0              | -4.057353               | -1.703015 | 2.879930  |
| 36               | 1                | 0              | -3.149650               | -0.250404 | 2.389118  |
| 37               | 1                | 0              | -4.917739               | -0.171462 | 2.564169  |
| 38               | 8                | 0              | -1.635415               | 2.817427  | -0.690934 |
| 39               | 6                | 0              | -2.182704               | 4.149454  | -0.864850 |
| 40               | 1                | 0              | -1.436571               | 4.803867  | -1.319254 |
| 41               | 1                | 0              | -3.038863               | 4.019916  | -1.524509 |
| 42               | 1                | 0              | -2.489393               | 4.555080  | 0.101127  |
| 43               | 6                | 0              | 5.186376                | -0.367526 | -0.356504 |
| 44               | 8                | 0              | 6.048245                | 0.437908  | -0.647502 |
| 45               | 8                | 0              | 5.378458                | -1.692353 | -0.272645 |
| 46               | 6                | 0              | 6.721257                | -2.157781 | -0.556949 |
| 47               | 1                | 0              | 6.679951                | -3.239084 | -0.437035 |
| 48               | 1                | 0              | 7.002044                | -1.887960 | -1.576877 |
| 49               | 1                | 0              | 7.427161                | -1.713253 | 0.147253  |

TS<sub>10h</sub>"-11h"

| Center<br>Number | Atomic<br>Number | Atomic<br>Type | Coordinates (Angstroms) |           |           |
|------------------|------------------|----------------|-------------------------|-----------|-----------|
|                  |                  |                | X                       | Y         | Z         |
| 1                | 6                | 0              | -5.311220               | -1.941427 | 0.477920  |
| 2                | 1                | 0              | -6.089848               | -2.292201 | 1.137498  |
| 3                | 6                | 0              | -5.164910               | -2.064086 | -0.867974 |
| 4                | 1                | 0              | -5.792726               | -2.540524 | -1.605006 |
| 5                | 7                | 0              | -4.213061               | -1.228426 | 0.932818  |
| 6                | 7                | 0              | -3.980576               | -1.423953 | -1.198068 |
| 7                | 6                | 0              | -3.378797               | -0.898752 | -0.093470 |
| 8                | 29               | 0              | -1.779471               | 0.132014  | -0.017122 |
| 9                | 6                | 0              | 1.447905                | -0.395366 | 0.125184  |
| 10               | 6                | 0              | 1.080254                | 1.018767  | -0.092531 |
| 11               | 6                | 0              | 2.153032                | 1.876734  | -0.409624 |
| 12               | 1                | 0              | 1.931977                | 2.914967  | -0.607254 |
| 13               | 6                | 0              | 3.477660                | 1.430846  | -0.496006 |
| 14               | 1                | 0              | 4.255994                | 2.134901  | -0.774758 |
| 15               | 6                | 0              | 3.847899                | 0.117151  | -0.226962 |
| 16               | 6                | 0              | 2.822880                | -0.798446 | 0.118838  |
| 17               | 1                | 0              | 3.062522                | -1.853109 | 0.158246  |
| 18               | 6                | 0              | -0.624986               | 2.675582  | 0.012058  |
| 19               | 8                | 0              | 0.077748                | 3.671262  | 0.023739  |
| 20               | 6                | 0              | 2.231902                | -0.397802 | 1.960742  |
| 21               | 1                | 0              | 1.212484                | -0.534273 | 2.322954  |
| 22               | 1                | 0              | 2.887815                | -1.179665 | 2.338033  |
| 23               | 1                | 0              | 2.617378                | 0.603480  | 2.123113  |
| 24               | 7                | 0              | -0.237031               | 1.333440  | 0.006697  |
| 25               | 8                | 0              | 0.427751                | -1.266515 | 0.098771  |
| 26               | 6                | 0              | 0.671546                | -2.686587 | 0.056771  |
| 27               | 1                | 0              | 1.266234                | -2.952335 | -0.821670 |
| 28               | 1                | 0              | 1.164353                | -3.026561 | 0.972896  |
| 29               | 1                | 0              | -0.316860               | -3.138417 | -0.012753 |
| 30               | 6                | 0              | -3.478750               | -1.299725 | -2.565734 |
| 31               | 1                | 0              | -4.173082               | -0.710747 | -3.170792 |
| 32               | 1                | 0              | -2.513591               | -0.793740 | -2.536100 |
| 33               | 1                | 0              | -3.357023               | -2.289737 | -3.012930 |
| 34               | 6                | 0              | -4.003193               | -0.866379 | 2.333353  |
| 35               | 1                | 0              | -3.904312               | -1.766091 | 2.946794  |
| 36               | 1                | 0              | -3.089821               | -0.275663 | 2.404417  |
| 37               | 1                | 0              | -4.843848               | -0.269679 | 2.696508  |
| 38               | 8                | 0              | -1.981090               | 2.736030  | 0.030052  |
| 39               | 6                | 0              | -2.547502               | 4.065321  | 0.056963  |
| 40               | 1                | 0              | -2.239517               | 4.625931  | -0.828062 |
| 41               | 1                | 0              | -3.626566               | 3.916032  | 0.063453  |
| 42               | 1                | 0              | -2.223816               | 4.596448  | 0.954576  |
| 43               | 6                | 0              | 5.272263                | -0.292776 | -0.293448 |
| 44               | 8                | 0              | 6.174531                | 0.442159  | -0.640166 |
| 45               | 8                | 0              | 5.446708                | -1.582978 | 0.078387  |
| 46               | 6                | 0              | 6.809579                | -2.071201 | 0.030816  |
| 47               | 1                | 0              | 6.755375                | -3.108584 | 0.357825  |
| 48               | 1                | 0              | 7.196130                | -2.003251 | -0.987999 |
| 49               | 1                | 0              | 7.441525                | -1.483781 | 0.699788  |

11h”

| Center<br>Number | Atomic<br>Number | Atomic<br>Type | Coordinates (Angstroms) |           |           |
|------------------|------------------|----------------|-------------------------|-----------|-----------|
|                  |                  |                | X                       | Y         | Z         |
| 1                | 6                | 0              | -5.223610               | -2.114571 | 0.644302  |
| 2                | 1                | 0              | -5.863437               | -2.641322 | 1.335312  |
| 3                | 6                | 0              | -5.341607               | -1.906933 | -0.693986 |
| 4                | 1                | 0              | -6.103877               | -2.218244 | -1.391415 |
| 5                | 7                | 0              | -4.051743               | -1.489338 | 1.040699  |
| 6                | 7                | 0              | -4.238637               | -1.160716 | -1.078362 |
| 7                | 6                | 0              | -3.429539               | -0.891459 | -0.014669 |
| 8                | 29               | 0              | -1.844030               | 0.160596  | -0.000554 |
| 9                | 6                | 0              | 1.415006                | -0.350779 | -0.131495 |
| 10               | 6                | 0              | 1.037461                | 1.027842  | -0.010971 |
| 11               | 6                | 0              | 2.129793                | 1.921695  | -0.010656 |
| 12               | 1                | 0              | 1.897866                | 2.978449  | 0.000093  |
| 13               | 6                | 0              | 3.494982                | 1.525837  | -0.068716 |
| 14               | 1                | 0              | 4.259561                | 2.294451  | -0.123252 |
| 15               | 6                | 0              | 3.867213                | 0.216450  | -0.066665 |
| 16               | 6                | 0              | 2.812476                | -0.829321 | 0.070176  |
| 17               | 1                | 0              | 3.030928                | -1.668579 | -0.597932 |
| 18               | 6                | 0              | -0.684132               | 2.675180  | 0.078349  |
| 19               | 8                | 0              | 0.013312                | 3.680109  | 0.112188  |
| 20               | 6                | 0              | 2.868736                | -1.392357 | 1.554465  |
| 21               | 1                | 0              | 2.070273                | -2.113390 | 1.739377  |
| 22               | 1                | 0              | 3.831863                | -1.884134 | 1.692972  |
| 23               | 1                | 0              | 2.771826                | -0.569570 | 2.265705  |
| 24               | 7                | 0              | -0.299159               | 1.347314  | 0.013936  |
| 25               | 8                | 0              | 0.440109                | -1.212356 | -0.322946 |
| 26               | 6                | 0              | 0.661719                | -2.590863 | -0.715998 |
| 27               | 1                | 0              | 1.217416                | -2.621230 | -1.656602 |
| 28               | 1                | 0              | 1.185182                | -3.145185 | 0.063262  |
| 29               | 1                | 0              | -0.337931               | -2.997904 | -0.856591 |
| 30               | 6                | 0              | -4.006943               | -0.698886 | -2.446176 |
| 31               | 1                | 0              | -4.819349               | -0.039953 | -2.763466 |
| 32               | 1                | 0              | -3.068474               | -0.144836 | -2.470335 |
| 33               | 1                | 0              | -3.944306               | -1.552109 | -3.126845 |
| 34               | 6                | 0              | -3.577319               | -1.453775 | 2.422814  |
| 35               | 1                | 0              | -3.418726               | -2.469925 | 2.793802  |
| 36               | 1                | 0              | -2.635777               | -0.905068 | 2.450593  |
| 37               | 1                | 0              | -4.306647               | -0.944747 | 3.058355  |
| 38               | 8                | 0              | -2.044271               | 2.740466  | 0.103484  |
| 39               | 6                | 0              | -2.606838               | 4.067858  | 0.181909  |
| 40               | 1                | 0              | -2.311537               | 4.658077  | -0.688276 |
| 41               | 1                | 0              | -3.686274               | 3.920359  | 0.199536  |
| 42               | 1                | 0              | -2.270888               | 4.569941  | 1.091685  |
| 43               | 6                | 0              | 5.309182                | -0.142650 | -0.150379 |
| 44               | 8                | 0              | 6.208147                | 0.672708  | -0.192720 |
| 45               | 8                | 0              | 5.496243                | -1.480545 | -0.193357 |
| 46               | 6                | 0              | 6.874079                | -1.920001 | -0.296217 |
| 47               | 1                | 0              | 6.828323                | -3.007741 | -0.314940 |
| 48               | 1                | 0              | 7.320932                | -1.531751 | -1.213491 |
| 49               | 1                | 0              | 7.444438                | -1.566371 | 0.564907  |

#### 4. Analytical data

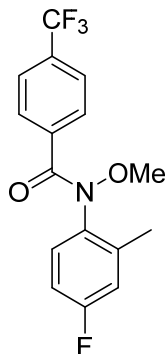

***N*-(4-Fluoro-2-methylphenyl)-*N*-methoxy-4-(trifluoromethyl)benzamide (1b).** Brown solid.  $R_f = 0.44$  [hexane/EtOAc = 3:1 (v/v)].  $^1\text{H}$  NMR (400 MHz,  $\text{CDCl}_3$ )  $\delta$  7.73 (br, 2H), 7.63 (br, 2H), 7.23 (br, 1H), 7.01 (d,  $J = 8.7$  Hz, 1H), 6.92 (br, 1H), 3.66 (s, 3H), 2.36 (s, 3H).  $^{13}\text{C}$  NMR (100 MHz,  $\text{CDCl}_3$ )  $\delta$  167.1, 162.4 (d,  $J = 249$  Hz), 139.3 (d,  $J = 8.6$  Hz), 137.6, 132.1 (q,  $J = 33$  Hz), 130.1, 128.4, 128.1, 127.5, 124.8 (q,  $J = 2.9$  Hz), 122.1, 119.4, 117.8 (d,  $J = 22$  Hz), 113.4 (d,  $J = 23$  Hz), 60.7, 17.8.  $^{19}\text{F}$  NMR (565 MHz,  $\text{CDCl}_3$ )  $\delta$  -111.8, -110.4, -62.9. IR (neat) 3068, 2973, 2937, 2817, 1926, 1768, 1664, 1618, 1588, 1493, 1439, 1409, 1379, 1271, 1246, 1228, 1215, 1168, 1125, 1109, 1065, 1038, 1016, 972, 951, 886, 856, 836, 815, 762, 714, 686  $\text{cm}^{-1}$ . HRMS (ESI) calcd. for  $\text{C}_{16}\text{H}_{13}\text{F}_4\text{NO}_2$  ( $\text{M}+\text{Na}$ ) $^+$  327.0882, found 327.0880.

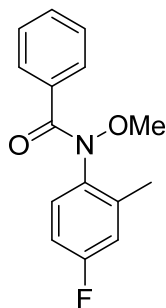

***N*-(4-Fluoro-2-methylphenyl)-*N*-methoxybenzamide (1c).** Orange oil.  $R_f = 0.27$  [hexane/EtOAc = 3:1 (v/v)].  $^1\text{H}$  NMR (400 MHz,  $\text{CDCl}_3$ )  $\delta$  7.56 (m, 2H), 7.33-7.40 (m, 3H), 7.21 (br, 1H), 6.98 (d,  $J = 8.7$  Hz, 1H), 6.88 (br, 1H), 3.71 (s, 3H), 2.35 (s, 3H).  $^{13}\text{C}$  NMR (100 MHz,  $\text{CDCl}_3$ )  $\delta$  168.2, 162.0 (d,  $J = 249$  Hz), 139.1 (d,  $J = 8.6$  Hz), 133.8, 133.5, 130.4, 130.2, 127.9, 127.7, 117.5 (d,  $J = 22$  Hz), 113.0 (d,  $J = 23$  Hz), 60.4, 17.8.  $^{19}\text{F}$  NMR (565 MHz,  $\text{CDCl}_3$ )  $\delta$  -112.0. IR (neat) 3062, 3003, 2973, 2933, 2897, 2815, 1959, 1889, 1814, 1773, 1659, 1617, 1601, 1588, 1493, 1446, 1417, 1352, 1270, 1244, 1227, 1182, 1151, 1101, 1073, 1040, 1022, 971, 950, 865, 838, 814, 785, 754, 696, 679  $\text{cm}^{-1}$ . HRMS (ESI) calcd. for  $\text{C}_{15}\text{H}_{14}\text{FNO}_2$  ( $\text{M}+\text{Na}$ ) $^+$  259.1009, found 259.1009.

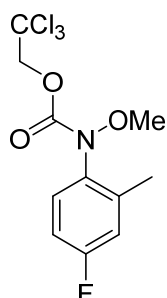

**2,2,2-Trichloroethyl (4-fluoro-2-methylphenyl)(methoxy)carbamate (1e).** Orange oil.  $R_f = 0.58$  [hexane/EtOAc = 3:1 (v/v)].  $^1\text{H}$  NMR (400 MHz,  $\text{CDCl}_3$ )  $\delta$  7.28 (dd,  $J = 8.7, 5.5$  Hz, 1H), 6.99 (dd,  $J = 9.2, 2.8$  Hz, 1H), 6.93 (td,  $J = 8.2, 2.8$  Hz, 1H), 4.82 (s, 2H), 3.78 (s, 3H), 2.33 (s, 3H).  $^{13}\text{C}$  NMR (100 MHz,  $\text{CDCl}_3$ )  $\delta$  162.4 (d,  $J = 249$  Hz), 153.2, 139.2 (d,  $J = 9.6$  Hz), 133.1 (d,  $J = 2.9$  Hz), 129.8 (d,  $J = 9.6$  Hz), 117.5 (d,  $J = 22$  Hz), 95.0, 74.9, 61.7, 17.8.  $^{19}\text{F}$  NMR (565 MHz,  $\text{CDCl}_3$ )  $\delta$  -111.9 IR (neat) 2966, 2935, 1747, 1275, 1616, 1589, 1496, 1438, 1421, 1387, 1334, 1269, 1240, 1225, 1151, 1111, 1056, 985, 958, 938, 905, 866, 822, 778, 743, 712  $\text{cm}^{-1}$ . HRMS (ESI) calcd. for  $\text{C}_{11}\text{H}_{11}\text{Cl}_3\text{FNO}_3$  ( $\text{M}+\text{Na}$ ) $^+$  328.9789, found 328.9787.

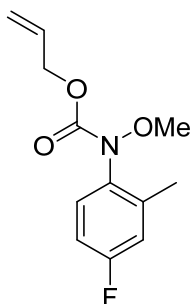

**Allyl (4-fluoro-2-methylphenyl)(methoxy)carbamate (1f).** Orange oil.  $R_f = 0.50$  [hexane/EtOAc = 3:1 (v/v)].  $^1\text{H}$  NMR (400 MHz,  $\text{CDCl}_3$ )  $\delta$  7.25 (dd,  $J = 8.7, 5.5$  Hz, 1H), 6.97 (dd,  $J = 9.2, 2.8$  Hz, 1H), 6.91 (td,  $J = 8.7, 2.8$  Hz, 1H), 5.92 (ddt,  $J = 16.9, 10.5, 5.5$  Hz, 1H), 5.26 (d,  $J = 16.9$  Hz, 1H), 5.22 (dq,  $J = 10.5, 0.9$  Hz, 1H), 4.67 (dt,  $J = 6.0, 1.4$  Hz, 2H), 3.73 (s, 3H), 2.29 (s, 3H).  $^{13}\text{C}$  NMR (100 MHz,  $\text{CDCl}_3$ )  $\delta$  162.2 (d,  $J = 248$  Hz), 154.9, 139.0 (d,  $J = 8.6$  Hz), 134.1, 131.9, 129.5 (d,  $J = 8.6$  Hz), 118.0, 117.4 (d,  $J = 22$  Hz), 113.1 (d,  $J = 22$  Hz), 66.6, 61.7, 17.7.  $^{19}\text{F}$  NMR (565 MHz,  $\text{CDCl}_3$ )  $\delta$  -112.7. IR (neat) 3087, 2971, 2935, 2897, 2816, 1735, 1714, 1649, 1616, 1589, 1496, 1441, 1419, 1381, 1325, 1269, 1244, 1224, 1188, 1150, 1091, 1030, 989, 935, 865, 820, 771, 729  $\text{cm}^{-1}$ . HRMS (ESI) calcd. for  $\text{C}_{12}\text{H}_{14}\text{FNO}_3$  ( $\text{M}+\text{Na}$ ) $^+$  239.0958, found 239.0957.

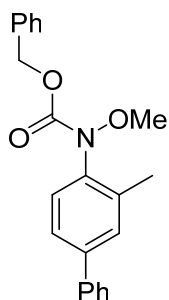

**Benzyl methoxy[3-methyl-(1,1'-biphenyl)-4-yl]carbamate (1h).** Yellow oil.  $R_f = 0.50$  [hexane/EtOAc = 3:1 (v/v)].  $^1\text{H}$  NMR (600 MHz,  $\text{CDCl}_3$ )  $\delta$  7.57-7.59 (m, 2H), 7.42-7.47 (m, 4H), 7.29-7.37 (m, 7H), 5.25 (s, 2H), 3.77 (s, 3H), 2.31 (s, 3H).  $^{13}\text{C}$  NMR (100 MHz,  $\text{CDCl}_3$ )  $\delta$  155.2, 141.7, 140.3, 137.2, 136.6, 136.0, 129.7, 128.7, 128.4, 128.1, 127.9, 127.5, 127.1, 125.2, 67.7, 61.9, 17.9. IR (neat) 3061, 3032, 2965, 2931, 2894, 1954, 1891, 1727, 1601, 1586, 1571, 1508, 1486, 1455, 1388, 1327, 1239, 1180, 1131, 1091, 1024, 986, 907, 885, 832, 768, 734, 714, 695  $\text{cm}^{-1}$ . HRMS (ESI) calcd. for  $\text{C}_{22}\text{H}_{21}\text{NO}_3$  ( $\text{M}+\text{Na}$ ) $^+$  347.1521, found 347.1521.

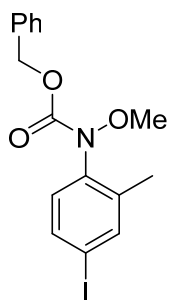

**Benzyl (4-iodo-2-methylphenyl)(methoxy)carbamate (1k).** Yellow oil.  $R_f = 0.53$  [hexane/EtOAc = 3:1 (v/v)].  $^1\text{H}$  NMR (600 MHz,  $\text{CDCl}_3$ )  $\delta$  7.61 (dd,  $J = 2.1, 0.7$  Hz, 1H), 7.54 (ddd,  $J = 8.3, 2.1, 0.7$  Hz, 1H), 7.30-7.36 (m, 5H), 7.00 (d,  $J = 8.3$  Hz, 1H), 5.21 (s, 2H), 3.71 (s, 3H), 2.18 (s, 3H).  $^{13}\text{C}$  NMR (100 MHz,  $\text{CDCl}_3$ )  $\delta$  154.8, 139.7, 138.6, 138.0, 135.7, 135.5, 129.2, 128.4, 128.1, 127.9, 94.4, 67.8, 62.0, 17.4. IR (neat) 3089, 3064, 3033, 2964, 2931, 2893, 2813, 1953, 1711, 1586, 1479, 1455, 1393, 1322, 1237, 1190, 1131, 1091, 1022, 984, 934, 907, 873, 820, 696  $\text{cm}^{-1}$ . HRMS (ESI) calcd. for  $\text{C}_{16}\text{H}_{16}\text{INO}_3$  ( $\text{M}+\text{Na}$ ) $^+$  397.0175, found 397.0175.

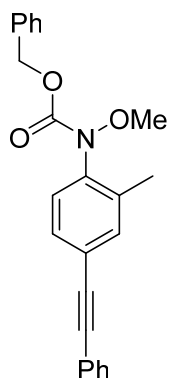

**Benzyl methoxy[2-methyl-4-(phenylethynyl)phenyl]carbamate (1l).** Yellow oil.  $R_f = 0.53$  [hexane/EtOAc = 3:1 (v/v)].  $^1\text{H}$  NMR (600 MHz,  $\text{CDCl}_3$ )  $\delta$  7.51-7.54 (m, 2H), 7.43 (br, 1H), 7.30-7.39 (m, 9H), 7.26 (d,  $J = 8.3$  Hz, 1H), 5.23 (s, 2H), 3.74 (s, 3H), 2.24 (s, 3H).  $^{13}\text{C}$  NMR (100 MHz,  $\text{CDCl}_3$ )  $\delta$  154.9, 137.9, 136.4, 135.8, 134.0, 131.5, 129.6, 128.4, 128.4, 128.3, 128.1, 127.9, 127.6, 123.6, 122.9, 90.1, 88.6, 67.8, 62.0, 17.6. IR (neat) 3064, 3033, 2967, 2932, 2894, 2251, 1714, 1602, 1572, 1498, 1455, 1442, 1388, 1335, 1309, 1238, 1092, 1023, 986, 907, 829, 755, 728, 690  $\text{cm}^{-1}$ . HRMS (ESI) calcd. for  $\text{C}_{24}\text{H}_{21}\text{NO}_3$  ( $\text{M}+\text{Na}$ ) $^+$  371.1521, found 371.1521.

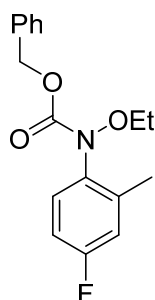

**Benzyl ethoxy(4-fluoro-2-methylphenyl)carbamate (1n).** Yellow oil.  $R_f = 0.56$  [hexane/EtOAc = 3:1 (v/v)].  $^1\text{H}$  NMR (600 MHz,  $\text{CDCl}_3$ )  $\delta$  7.29-7.35 (m, 5H), 7.24-7.26 (m, 1H), 6.94 (dd,  $J = 9.3, 2.8$  Hz, 1H), 6.90 (dt,  $J = 8.3, 3.1$  Hz, 1H), 5.21 (s, 2H), 3.95 (q,  $J = 6.9$  Hz, 2H), 2.23 (s, 3H), 1.22 (t,  $J = 7.2$  Hz, 3H).  $^{13}\text{C}$  NMR (100 MHz,  $\text{CDCl}_3$ )  $\delta$  162.1 (d,  $J = 248$  Hz), 155.5, 138.9, 136.0, 134.9, 129.4 (d,  $J = 9.6$  Hz), 128.5, 128.1, 127.9, 117.4 (d,  $J = 22$  Hz), 113.2 (d,  $J = 22$  Hz), 69.9, 67.8, 17.9, 13.5.  $^{19}\text{F}$  NMR (565 MHz,  $\text{CDCl}_3$ )  $\delta$  -113.1. IR (neat) 3066, 3034, 2981, 2935, 2888, 1955, 1869, 1733, 1714, 1617, 1589, 1496, 1456, 1418, 1389, 1331, 1268, 1244, 1150, 1091, 1031, 955, 939, 868, 819, 795, 755  $\text{cm}^{-1}$ . HRMS (ESI) calcd. for  $\text{C}_{17}\text{H}_{18}\text{FNO}_3$  ( $\text{M}+\text{Na}$ ) $^+$  303.12707, found 303.12705.

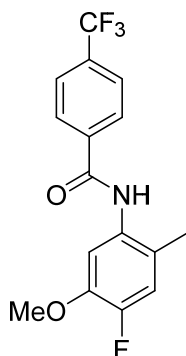

***N*-(4-Fluoro-5-methoxy-2-methylphenyl)-4-(trifluoromethyl)benzamide (3ba).**

Colorless solid.  $R_f = 0.42$  [hexane/EtOAc = 3:1 (v/v)].  $^1\text{H}$  NMR (400 MHz,  $\text{CDCl}_3$ )  $\delta$  8.00 (d,  $J = 8.2$  Hz, 2H), 7.78 (d,  $J = 8.2$  Hz, 2H), 7.69 (d,  $J = 7.8$  Hz, 1H), 7.59 (br, 1H), 6.97 (d,  $J = 11.5$  Hz, 1H), 3.91 (s, 3H), 2.26 (s, 3H).  $^{13}\text{C}$  NMR (100 MHz,  $\text{CDCl}_3$ )  $\delta$  164.4, 149.7 (d,  $J = 244$  Hz), 145.8 (d,  $J = 12$  Hz), 137.9, 133.7 (q,  $J = 33$  Hz), 131.0 (d,  $J = 2.9$  Hz), 127.5, 126.0 (q,  $J = 3.8$  Hz), 123.5 (q,  $J = 272$  Hz), 121.9 (d,  $J = 5.8$  Hz), 117.6 (d,  $J = 19$  Hz), 109.2, 56.4, 16.9.  $^{19}\text{F}$  NMR (565 MHz,  $\text{CDCl}_3$ )  $\delta$  -138.2, -62.9. IR (neat) 3271, 2924, 2853, 1662, 1638, 1536, 1519, 1469, 1408, 1330, 1277, 1218, 1199, 1170, 1127, 1109, 1091, 1067, 1017, 925, 876, 858, 691  $\text{cm}^{-1}$ . HRMS (ESI) calcd. for  $\text{C}_{16}\text{H}_{13}\text{F}_4\text{NO}_2$  ( $\text{M}+\text{Na}$ ) $^+$  327.0882, found 327.0882.

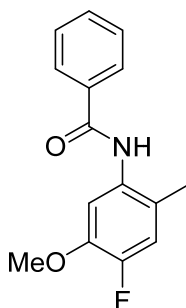

***N*-(4-Fluoro-5-methoxy-2-methylphenyl)benzamide (3ca).** Colorless solid.  $R_f = 0.22$  [hexane/EtOAc = 3:1 (v/v)].  $^1\text{H}$  NMR (400 MHz,  $\text{CDCl}_3$ )  $\delta$  7.85-7.90 (m, 2H), 7.64-7.73 (m, 2H), 7.54-7.60 (m, 1H), 7.47-7.53 (m, 2H), 6.93 (d,  $J = 11.5$  Hz, 1H), 3.88 (s, 3H), 2.24 (s, 3H).  $^{13}\text{C}$  NMR (100 MHz,  $\text{CDCl}_3$ )  $\delta$  165.7, 149.4 (d,  $J = 243$  Hz), 145.6 (d,  $J = 11$  Hz), 134.5, 131.9, 131.5 (d,  $J = 2.9$  Hz), 128.8, 127.0, 122.0 (d,  $J = 6.7$  Hz), 117.4 (d,  $J = 19$  Hz), 109.2, 56.3, 16.9.  $^{19}\text{F}$  NMR (565 MHz,  $\text{CDCl}_3$ )  $\delta$  -139.1. IR (neat) 3286, 2960, 2933, 1644, 1602, 1579, 1510, 1487, 1462, 1408, 1334, 1308, 1272, 1212, 1199, 1132, 1092, 1074, 1017, 918, 864, 849, 836, 798, 771, 753, 709, 691, 665  $\text{cm}^{-1}$ . HRMS (ESI) calcd. for  $\text{C}_{15}\text{H}_{14}\text{FNO}_2$  ( $\text{M}+\text{Na}$ ) $^+$  259.1009, found 259.1008.

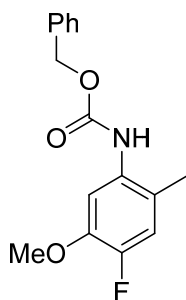

**Benzyl (4-fluoro-5-methoxy-2-methylphenyl)carbamate (3da).** Colorless solid.  $R_f = 0.39$  [hexane/EtOAc = 3:1 (v/v)].  $^1\text{H}$  NMR (400 MHz,  $\text{CDCl}_3$ )  $\delta$  7.56 (br, 1H), 7.37-7.41 (m, 5H), 6.86 (d,  $J = 11.5$  Hz, 1H), 6.39 (br, 1H), 5.20 (s, 2H), 3.86 (s, 3H), 2.14 (s, 3H).  $^{13}\text{C}$  NMR (100 MHz,  $\text{CDCl}_3$ )  $\delta$  153.7, 148.7 (d,  $J = 241$  Hz), 145.7 (d,  $J = 11$  Hz), 135.9, 131.5, 128.6, 128.4, 128.4, 119.5, 117.3 (d,  $J = 19$  Hz), 107.1, 67.2, 56.3, 16.8.  $^{19}\text{F}$  NMR (565 MHz,  $\text{CDCl}_3$ )  $\delta$  -141.0. IR (neat) 3279, 2956, 2928, 1692, 1535, 1514, 1454, 1409, 1334, 1254, 1207, 1121, 1056, 1019, 873, 837, 772, 694  $\text{cm}^{-1}$ . HRMS (ESI) calcd. for  $\text{C}_{16}\text{H}_{16}\text{FNO}_3$  ( $\text{M}+\text{Na}$ ) $^+$  289.1114, found 289.1113.

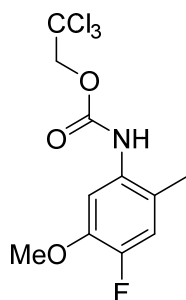

**2,2,2-Trichloroethyl (4-fluoro-5-methoxy-2-methylphenyl)carbamate (3ea).** Colorless solid.  $R_f = 0.49$  [hexane/EtOAc = 3:1 (v/v)].  $^1\text{H}$  NMR (400 MHz,  $\text{CDCl}_3$ )  $\delta$  7.45 (d,  $J = 6.0$  Hz, 1H), 6.91 (d,  $J = 11.5$  Hz, 1H), 6.57 (br, 1H), 4.83 (s, 2H), 3.88 (s, 3H), 2.22 (s, 3H).  $^{13}\text{C}$  NMR (100 MHz,  $\text{CDCl}_3$ )  $\delta$  152.1, 149.3 (d,  $J = 244$  Hz), 145.9, 130.6, 121.0, 117.5 (d,  $J = 19$  Hz), 108.0, 95.2, 74.6, 56.4, 16.8.  $^{19}\text{F}$  NMR (565 MHz,  $\text{CDCl}_3$ )  $\delta$  -139.5. IR (neat) 3317, 2957, 1724, 1629, 1601, 1534, 1457, 1413, 1333, 1276, 1126, 1092, 1048, 1016, 966, 871, 820, 741, 719  $\text{cm}^{-1}$ . HRMS (ESI) calcd. for  $\text{C}_{11}\text{H}_{11}\text{Cl}_3\text{FNO}_3$  ( $\text{M}+\text{Na}$ ) $^+$  328.9789, found 328.9788.

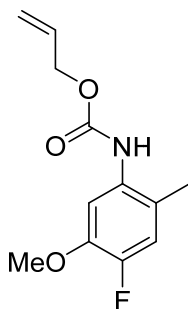

**Allyl (4-fluoro-5-methoxy-2-methylphenyl)carbamate (3fa).** Colorless solid.  $R_f = 0.39$  [hexane/EtOAc = 3:1 (v/v)].  $^1\text{H}$  NMR (400 MHz,  $\text{CDCl}_3$ )  $\delta$  7.55 (br, 1H), 6.88 (d,  $J = 11.5$  Hz, 1H), 6.35 (br, 1H), 5.98 (ddt,  $J = 17.0, 11.0, 5.5$  Hz, 1H), 5.38 (d,  $J = 17.4$  Hz, 1H), 5.28 (d,  $J = 11.5$  Hz, 1H), 4.67 (d,  $J = 5.5$  Hz, 2H), 3.88 (s, 3H), 2.17 (s, 3H).  $^{13}\text{C}$  NMR (100 MHz,  $\text{CDCl}_3$ )  $\delta$  153.6, 148.7 (d,  $J = 244$  Hz), 145.6 (d,  $J = 12$  Hz), 132.3, 131.4, 112.0, 118.2, 117.2 (d,  $J = 19$  Hz), 107.3, 65.9, 56.2, 16.6.  $^{19}\text{F}$  NMR (565 MHz,  $\text{CDCl}_3$ )  $\delta$  -141.0. IR (neat) 3317, 2937, 1708, 1649, 1628, 1604, 1530, 1455, 1412, 1331, 1228, 1200, 1120, 1047, 996, 933, 870, 733, 699  $\text{cm}^{-1}$ . HRMS (ESI) calcd. for  $\text{C}_{12}\text{H}_{14}\text{FNO}_3$  ( $\text{M}+\text{Na}$ ) $^+$  239.0958, found 239.0957.

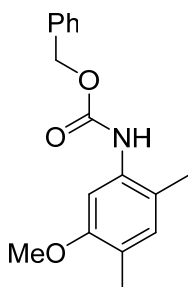

**Benzyl (5-methoxy-2,4-dimethylphenyl)carbamate (3ga).** Colorless solid.  $R_f = 0.54$  [hexane/EtOAc = 3:1 (v/v)].  $^1\text{H}$  NMR (400 MHz,  $\text{CDCl}_3$ )  $\delta$  7.32-7.46 (m, 6H), 6.89 (s, 1H), 6.42 (br, 1H), 5.20 (s, 2H), 3.81 (s, 3H), 2.14 (s, 3H), 2.13 (s, 3H).  $^{13}\text{C}$  NMR (100 MHz,  $\text{CDCl}_3$ )  $\delta$  156.4, 153.9, 136.3, 134.1, 132.2, 128.7, 128.5, 122.2, 118.5, 103.8, 67.1, 56.6, 16.7, 15.7. IR (neat) 3303, 2922, 1692, 1661, 1621, 1594, 1532, 1505, 1463, 1402, 1371, 1317, 1291, 1272, 1241, 1208, 1126, 1055, 1011, 988, 920, 873, 835, 747, 737, 697, 663  $\text{cm}^{-1}$ . HRMS (ESI) calcd. for  $\text{C}_{17}\text{H}_{19}\text{NO}_3$  ( $\text{M}+\text{Na}$ ) $^+$  285.1365, found 285.1364.

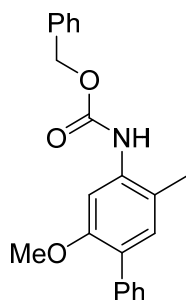

**Benzyl (2-methoxy-5-methyl-[1,1'-biphenyl]-4-yl)carbamate (3ha).** Colorless solid.  $R_f$  = 0.48 [hexane/EtOAc = 3:1 (v/v)].  $^1\text{H}$  NMR (400 MHz,  $\text{CDCl}_3$ )  $\delta$  7.69 (br, 1H), 7.27-7.51 (m, 10H), 7.09 (s, 1H), 6.54 (br, 1H), 5.24 (s, 2H), 3.81 (s, 3H), 2.21 (s, 3H).  $^{13}\text{C}$  NMR (100 MHz,  $\text{CDCl}_3$ )  $\delta$  155.2, 153.5, 138.1, 135.9, 135.9, 132.3, 129.4, 128.7, 128.5, 128.4, 128.0, 126.7, 126.0, 67.2, 55.7, 16.7. IR (neat) 3335, 2925, 2854, 1697, 1591, 1533, 1507, 1487, 1462, 1397, 1313, 1243, 1148, 1063, 1042, 892, 839, 697  $\text{cm}^{-1}$ . HRMS (ESI) calcd. for  $\text{C}_{22}\text{H}_{21}\text{NO}_3$  ( $\text{M}+\text{Na}$ ) $^+$  347.1521, found 347.1521.

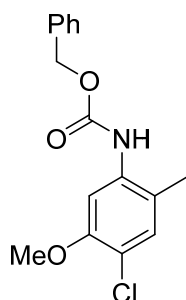

**Benzyl (4-chloro-5-methoxy-2-methylphenyl)carbamate (3ia).** Colorless solid.  $R_f$  = 0.43 [hexane/EtOAc = 3:1 (v/v)].  $^1\text{H}$  NMR (600 MHz,  $\text{CDCl}_3$ )  $\delta$  7.69 (br, 1H), 7.36-7.43 (m, 5H), 7.12 (s, 1H), 6.47 (br, 1H), 5.21 (s, 2H), 3.89 (s, 3H), 2.14 (s, 3H).  $^{13}\text{C}$  NMR (100 MHz,  $\text{CDCl}_3$ )  $\delta$  153.6, 153.3, 135.8, 135.3, 131.2, 128.7, 128.5, 128.4, 119.1, 109.1, 104.8, 67.3, 56.2, 16.5. IR (neat) 3295, 3033, 2956, 1705, 1612, 1584, 1523, 1454, 1397, 1301, 1219, 1073, 1046, 1003, 915, 882, 841, 772, 697  $\text{cm}^{-1}$ . HRMS (ESI) calcd. for  $\text{C}_{16}\text{H}_{16}\text{ClNO}_3$  ( $\text{M}+\text{Na}$ ) $^+$  305.0819, found 305.0818.

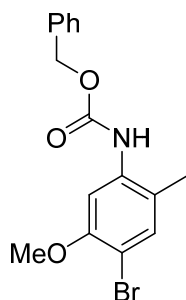

**Benzyl (4-bromo-5-methoxy-2-methylphenyl)carbamate (3ja).** Colorless solid.  $R_f = 0.42$  [hexane/EtOAc = 3:1 (v/v)].  $^1\text{H}$  NMR (400 MHz,  $\text{CDCl}_3$ )  $\delta$  7.67 (br, 1H), 7.33-7.45 (m, 5H), 7.29 (s, 1H), 6.49 (br, 1H), 5.21 (s, 2H), 3.88 (s, 3H), 2.14 (s, 3H).  $^{13}\text{C}$  NMR (100 MHz,  $\text{CDCl}_3$ )  $\delta$  154.5, 153.3, 136.0, 135.7, 134.1, 128.7, 128.35, 128.43, 119.5, 105.2, 104.4, 67.3, 56.3, 16.5. IR (neat) 3280, 3034, 2972, 2953, 2851, 1692, 1607, 1577, 1526, 1489, 1454, 1390, 1380, 1294, 1266, 1242, 1219, 1210, 1187, 1066, 1047, 736, 696  $\text{cm}^{-1}$ . HRMS (ESI) calcd. for  $\text{C}_{16}\text{H}_{16}\text{BrNO}_3$  ( $\text{M}+\text{Na}$ ) $^+$  349.0314, found 349.0313.

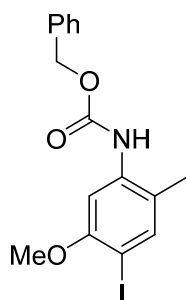

**Benzyl (4-iodo-5-methoxy-2-methylphenyl)carbamate (3ka).** Colorless solid.  $R_f = 0.50$  [hexane/EtOAc = 3:1 (v/v)].  $^1\text{H}$  NMR (600 MHz,  $\text{CDCl}_3$ )  $\delta$  7.62 (br, 1H), 7.51 (s, 1H), 7.35-7.43 (m, 5H), 6.48 (br, 1H), 5.21 (s, 2H), 3.87 (s, 3H), 2.13 (s, 3H).  $^{13}\text{C}$  NMR (100 MHz,  $\text{CDCl}_3$ )  $\delta$  157.1, 153.4, 140.1, 137.3, 135.9, 128.8, 128.6, 128.5, 120.3, 110.0, 103.5, 67.4, 56.5, 16.4. IR (neat) 3288, 2956, 1694, 1604, 1577, 1525, 1489, 1455, 1389, 1379, 1287, 1269, 1245, 1219, 1186, 1163, 1065, 1046, 1001, 882, 838, 697, 672  $\text{cm}^{-1}$ . HRMS (ESI) calcd. for  $\text{C}_{16}\text{H}_{16}\text{INO}_3$  ( $\text{M}+\text{Na}$ ) $^+$  397.0175, found 397.0174.

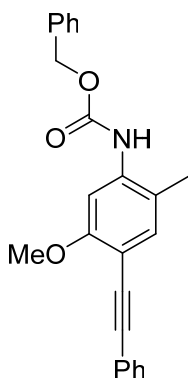

**Benzyl (5-methoxy-2-methyl-4-(phenylethynyl)phenyl)carbamate (3la).** Colorless oil.  $R_f = 0.60$  [hexane/EtOAc = 3:1 (v/v)].  $^1\text{H}$  NMR (600 MHz,  $\text{CDCl}_3$ )  $\delta$  7.72 (br, 1H), 7.51-7.54 (m, 2H), 7.26-7.44 (m, 10H), 6.58 (s, 1H), 5.22 (s, 2H), 3.91 (s, 3H), 2.16 (s, 3H).  $^{13}\text{C}$  NMR (100 MHz,  $\text{CDCl}_3$ )  $\delta$  159.1, 153.1, 137.2, 135.7, 131.6, 128.7, 128.5, 128.4, 128.2, 127.9, 123.7, 117.3, 107.0, 102.4, 92.6, 85.7, 67.3, 56.0, 16.5. IR (neat) 3331, 3033, 2930, 2856, 1737, 1613, 1583, 1518, 1486, 1456, 1403, 1335, 1259, 1219, 1110, 1044, 1004, 886, 852, 771, 692  $\text{cm}^{-1}$ . HRMS (ESI) calcd. for  $\text{C}_{24}\text{H}_{21}\text{NO}_3$  ( $\text{M}+\text{Na}$ ) $^+$  371.1521, found 371.1521.

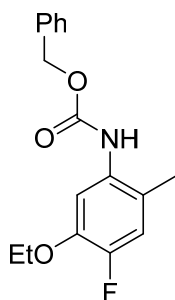

**Benzyl (5-ethoxy-4-fluoro-2-methylphenyl)carbamate (3nb).** Colorless solid.  $R_f = 0.45$  [hexane/EtOAc = 3:1 (v/v)].  $^1\text{H}$  NMR (400 MHz,  $\text{CDCl}_3$ )  $\delta$  7.54 (br, 1H), 7.33-7.44 (m, 5H), 6.86 (d,  $J = 11.5$  Hz, 1H), 6.36 (br, 1H), 5.20 (s, 2H), 4.09 (q,  $J = 6.9$  Hz, 2H), 2.15 (s, 3H), 1.43 (t,  $J = 7.3$  Hz, 3H).  $^{13}\text{C}$  NMR (100 MHz,  $\text{CDCl}_3$ )  $\delta$  153.7, 147.8, 145.0 (d,  $J = 12$  Hz), 135.9, 131.4, 128.6, 128.4, 128.3, 117.3 (d,  $J = 19$  Hz), 108.4 (d,  $J = 20$  Hz), 97.7, 67.2, 65.0, 16.8, 14.7.  $^{19}\text{F}$  NMR (565 MHz,  $\text{CDCl}_3$ )  $\delta$  -140.3. IR (neat) 3293, 2977, 2957, 2925, 1693, 1627, 1541, 1516, 1473, 1454, 1415, 1392, 1335, 1254, 1241, 1126, 1058, 1042, 1005, 924, 876, 845, 826, 694, 672  $\text{cm}^{-1}$ . HRMS (ESI) calcd. for  $\text{C}_{17}\text{H}_{18}\text{FNO}_3$  ( $\text{M}+\text{Na}$ ) $^+$  303.1271, found 303.1270.

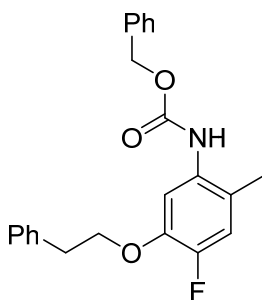

**Benzyl (4-fluoro-2-methyl-5-phenethoxyphenyl)carbamate (3dc).** Colorless solid.  $R_f$  = 0.41 [hexane/EtOAc = 3:1 (v/v)].  $^1\text{H}$  NMR (400 MHz,  $\text{CDCl}_3$ )  $\delta$  7.56 (br, 1H), 7.21-7.39 (m, 12H), 6.86 (d,  $J$  = 11.5 Hz, 1H), 6.35 (br, 1H), 5.18 (s, 2H), 4.21 (t,  $J$  = 6.4 Hz, 2H), 3.12 (t,  $J$  = 7.3 Hz, 2H), 2.14 (s, 3H).  $^{13}\text{C}$  NMR (100 MHz,  $\text{CDCl}_3$ )  $\delta$  153.7, 149.0 (d,  $J$  = 241 Hz), 144.9 (d,  $J$  = 12 Hz), 137.8, 135.9, 131.5, 129.1, 128.6, 128.5, 128.4, 128.4, 126.5, 119.8, 117.4 (d,  $J$  = 19 Hz), 108.4, 70.1, 67.2, 35.7, 16.8.  $^{19}\text{F}$  NMR (565 MHz,  $\text{CDCl}_3$ )  $\delta$  -140.0. IR (neat) 3426, 3311, 3087, 3063, 3031, 2951, 2926, 2874, 1955, 1870, 1705, 1627, 1603, 1530, 1496, 1469, 1453, 1418, 1331, 1219, 1197, 1120, 1084, 1042, 1028, 872, 771, 749, 697  $\text{cm}^{-1}$ . HRMS (ESI) calcd. for  $\text{C}_{23}\text{H}_{22}\text{FNO}_3$  ( $\text{M}+\text{Na}$ ) $^+$  379.1584, found 379.1583.

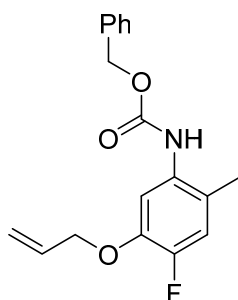

**Benzyl (5-(allyloxy)-4-fluoro-2-methylphenyl)carbamate (3dd).** Colorless solid.  $R_f$  = 0.46 [hexane/EtOAc = 3:1 (v/v)].  $^1\text{H}$  NMR (600 MHz,  $\text{CDCl}_3$ )  $\delta$  7.57 (br, 1H), 7.34-7.42 (m, 5H), 6.87 (d,  $J$  = 11.7 Hz, 1H), 6.37 (br, 1H), 6.05 (ddt,  $J$  = 16.2, 10.7, 5.5 Hz, 1H), 5.42 (d,  $J$  = 17.2 Hz, 1H), 5.29 (d,  $J$  = 11.3 Hz, 1H), 5.20 (s, 2H), 4.58 (s, 2H), 2.14 (s, 3H).  $^{13}\text{C}$  NMR (100 MHz,  $\text{CDCl}_3$ )  $\delta$  153.7, 149.0 (d,  $J$  = 243 Hz), 144.6 (d,  $J$  = 11 Hz), 135.9, 132.7, 132.7, 132.7, 131.4, 128.6, 128.4, 128.4, 118.3, 117.5 (d,  $J$  = 19 Hz), 113.3 (d,  $J$  = 22 Hz), 108.9, 70.3, 67.2, 16.8.  $^{19}\text{F}$  NMR (565 MHz,  $\text{CDCl}_3$ )  $\delta$  -139.8. IR (neat) 3283, 3033, 2958, 2925, 2863, 1692, 1649, 1627, 1540, 1516, 1455, 1415, 1337, 1256, 1220, 1124, 1056, 1017, 934, 876, 836, 695  $\text{cm}^{-1}$ . HRMS (ESI) calcd. for  $\text{C}_{18}\text{H}_{18}\text{FNO}_3$  ( $\text{M}+\text{Na}$ ) $^+$  315.1271, found 315.1271.

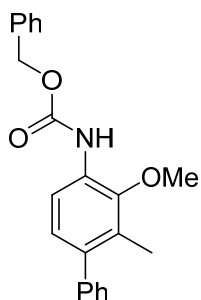

**Benzyl (3-methoxy-2-methyl-[1,1'-biphenyl]-4-yl)carbamate (5h).** Orange oil.  $R_f = 0.56$  [hexane/EtOAc = 3:1 (v/v)].  $^1\text{H}$  NMR (400 MHz,  $\text{CDCl}_3$ )  $\delta$  8.00 (d,  $J = 7.7$  Hz, 1H), 7.45-7.27 (m, 11H), 7.02 (d,  $J = 8.2$  Hz, 1H), 5.24 (s, 2H), 3.76 (s, 3H), 2.19 (s, 3H).  $^{13}\text{C}$  NMR (100 MHz,  $\text{CDCl}_3$ )  $\delta$  153.3, 146.9, 141.3, 138.0, 136.1, 130.4, 129.4, 128.6, 128.4, 128.3, 128.1, 126.8, 125.9, 116.0, 67.1, 60.3, 13.8. IR (neat) 3423, 3332, 3244, 3219, 3060, 3031, 2956, 2863, 2830, 1735, 1609, 1584, 1574, 1522, 1496, 1453, 1401, 1371, 1307, 1264, 1222, 1199, 1113, 1088, 1007, 950, 916, 827, 794, 770, 701, 677  $\text{cm}^{-1}$ . HRMS (FD) calcd. for  $\text{C}_{22}\text{H}_{21}\text{NO}_3$  ( $\text{M}^+$ ) 347.15214, found 347.15212.

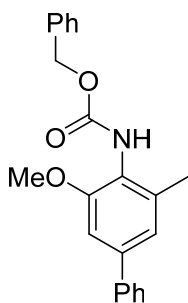

**Benzyl (3-methoxy-5-methyl-[1,1'-biphenyl]-4-yl)carbamate (6h).** Colorless solid.  $R_f = 0.25$  [hexane/EtOAc = 3:1 (v/v)].  $^1\text{H}$  NMR (400 MHz,  $\text{CDCl}_3$ )  $\delta$  7.57-7.54 (m, 2H), 7.44-7.28 (m, 8H), 7.06 (s, 1H), 6.93 (s, 1H), 6.31 (br, 1H), 5.21 (s, 2H), 3.85 (s, 3H), 2.34 (s, 3H).  $^{13}\text{C}$  NMR (100 MHz,  $\text{CDCl}_3$ )  $\delta$  154.2, 141.0, 140.3, 136.7, 136.4, 129.5, 128.7, 128.5, 128.2, 128.1, 127.9, 127.3, 127.1, 123.5, 121.7, 107.4, 67.1, 55.7, 18.5. IR (neat) 3384, 3282, 3060, 3032, 2955, 2933, 2853, 1712, 1591, 1575, 1520, 1494, 1455, 1404, 1341, 1289, 1218, 1148, 1099, 1080, 1048, 1029, 1004, 892, 848, 794, 764, 697  $\text{cm}^{-1}$ . HRMS (FD) calcd. for  $\text{C}_{22}\text{H}_{21}\text{NO}_3$  ( $\text{M}^+$ ) 347.15214, found 347.15210.

## 5. NMR charts

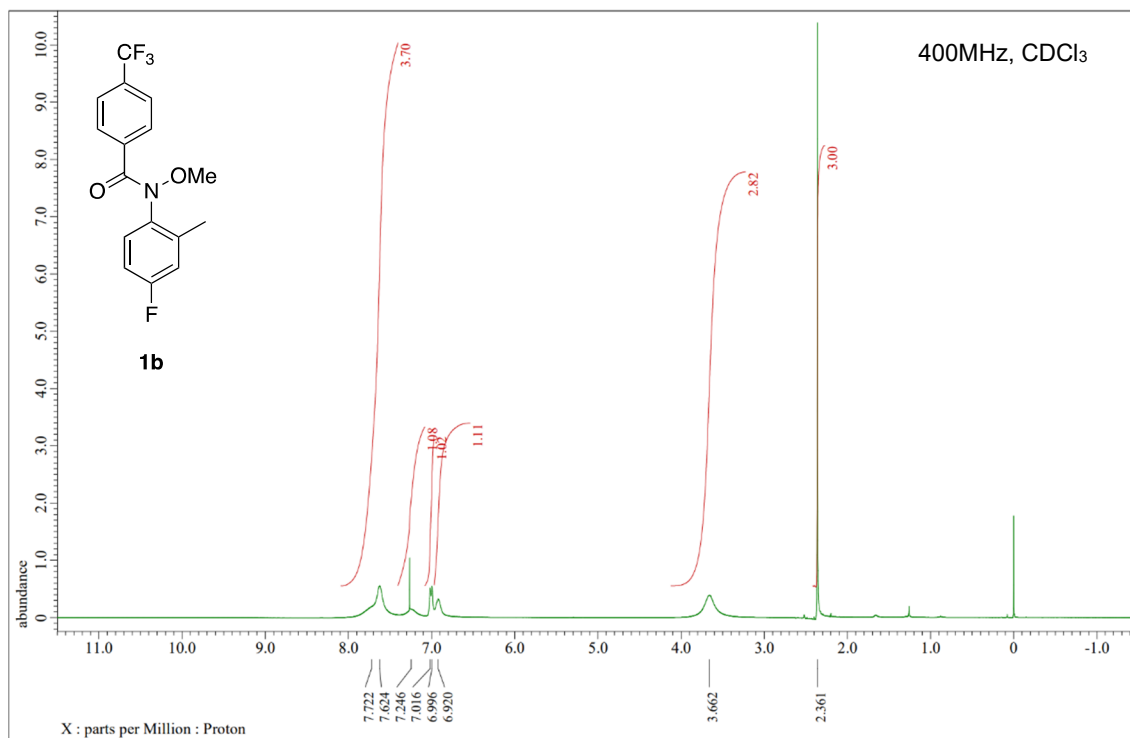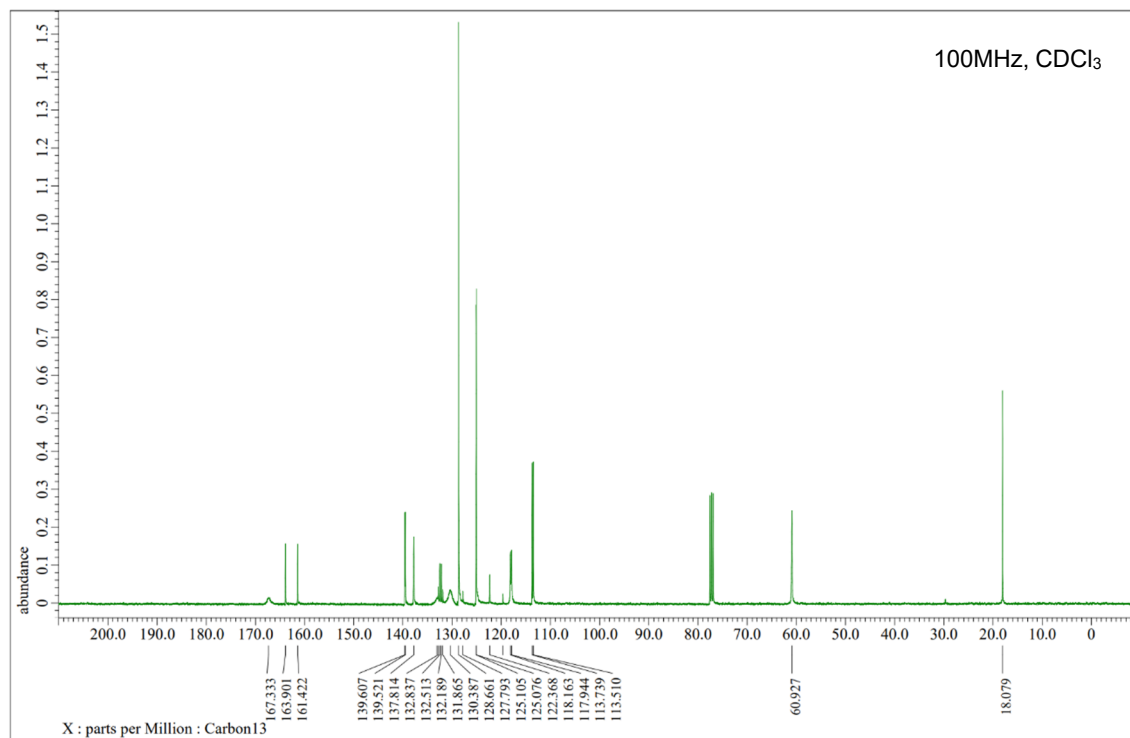

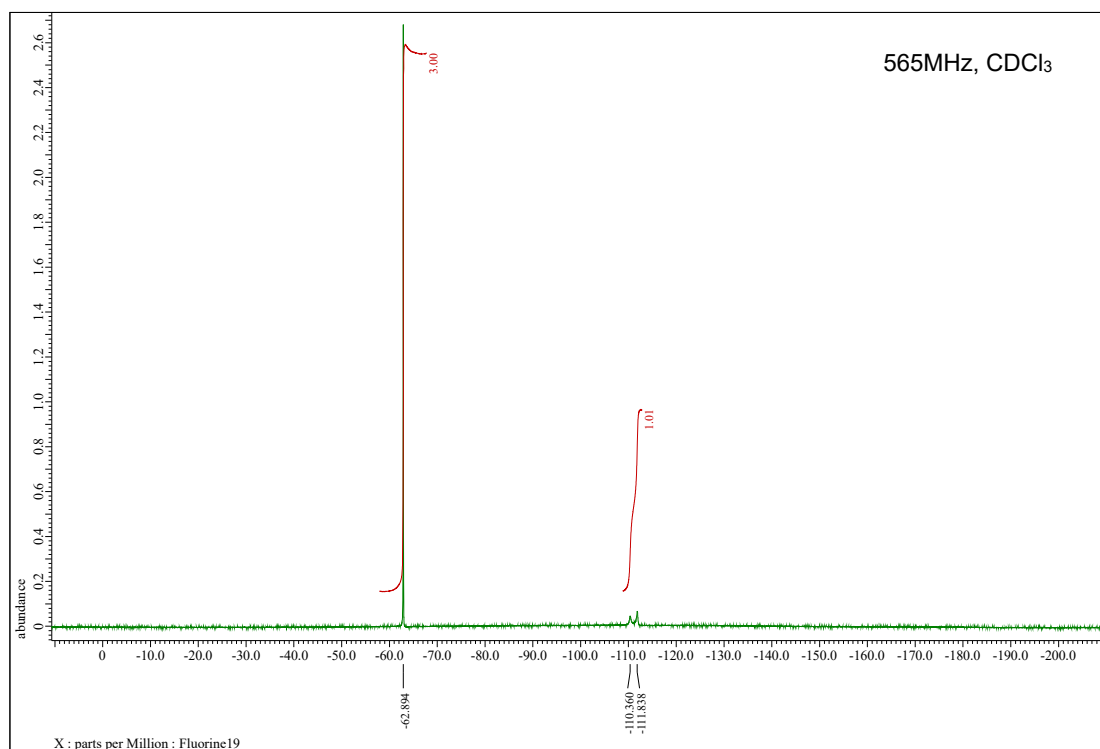

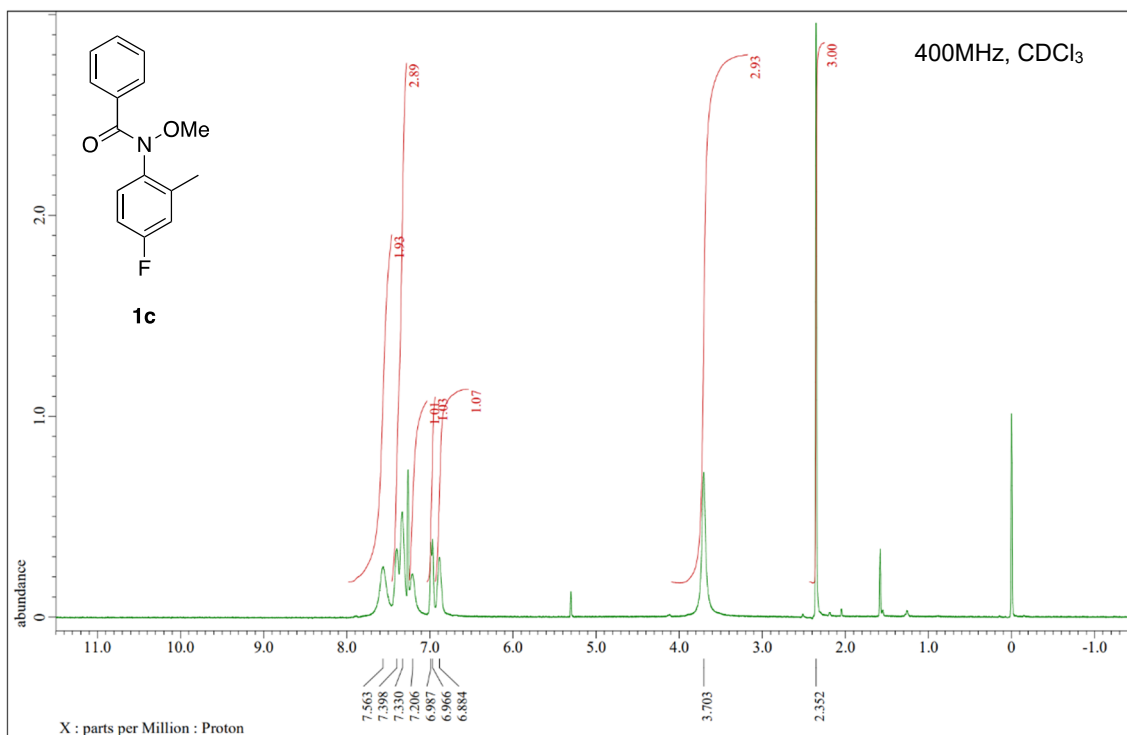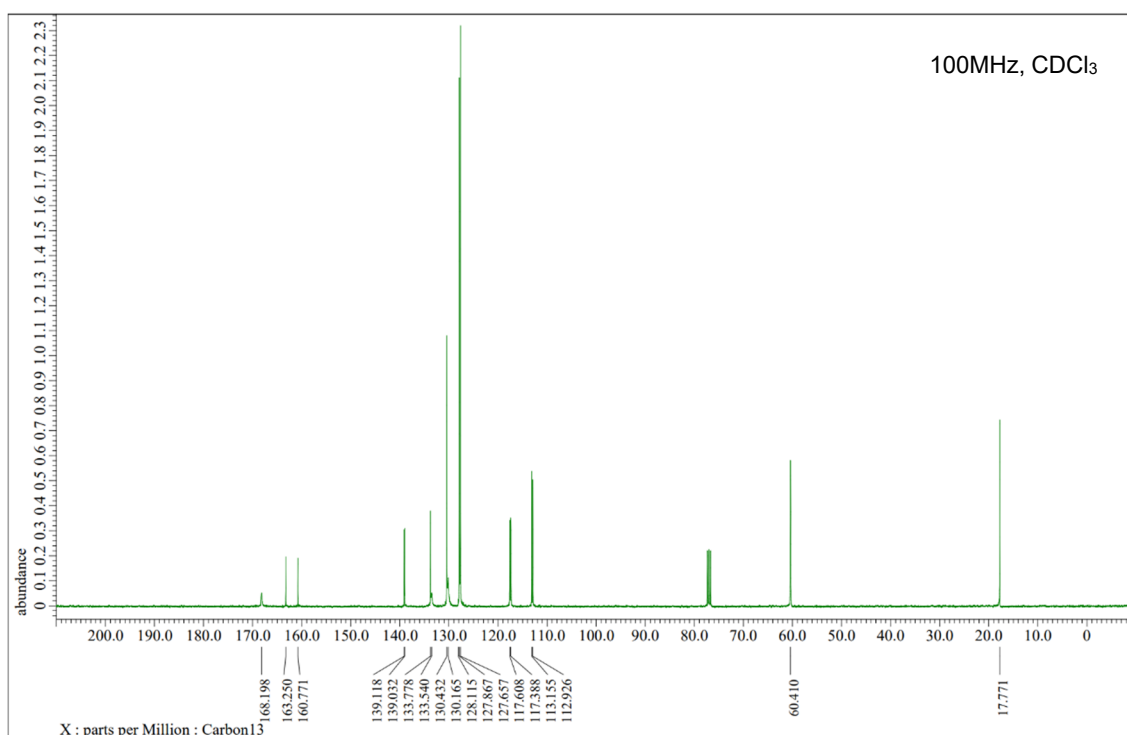

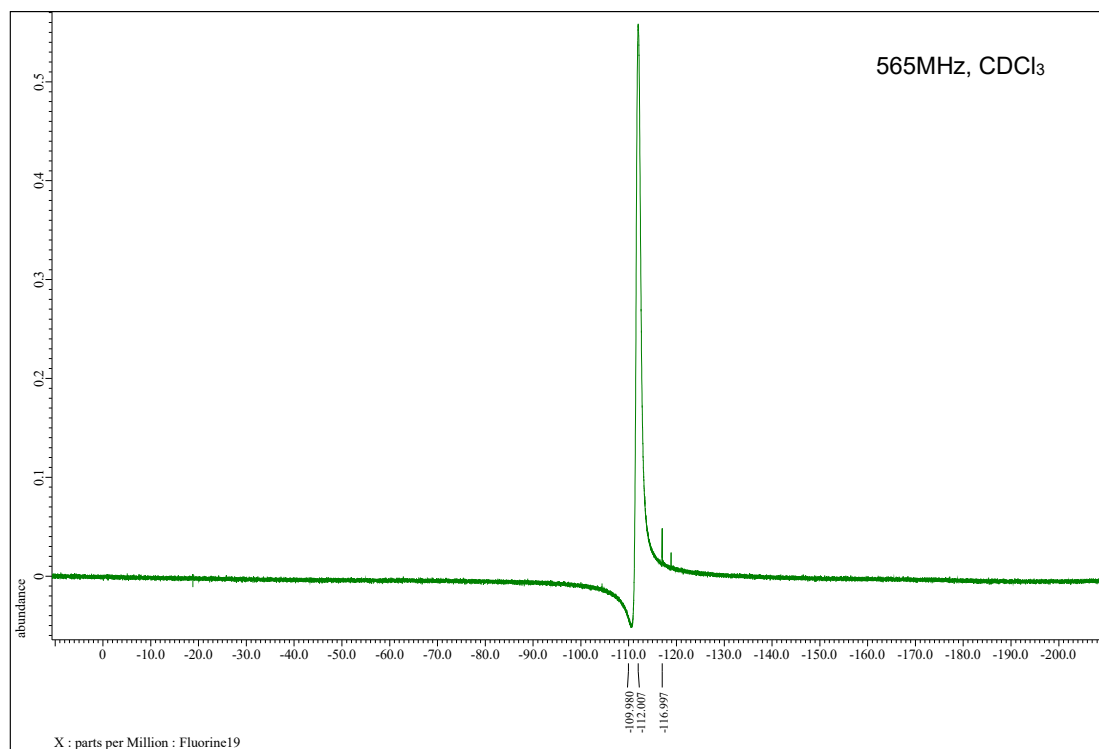

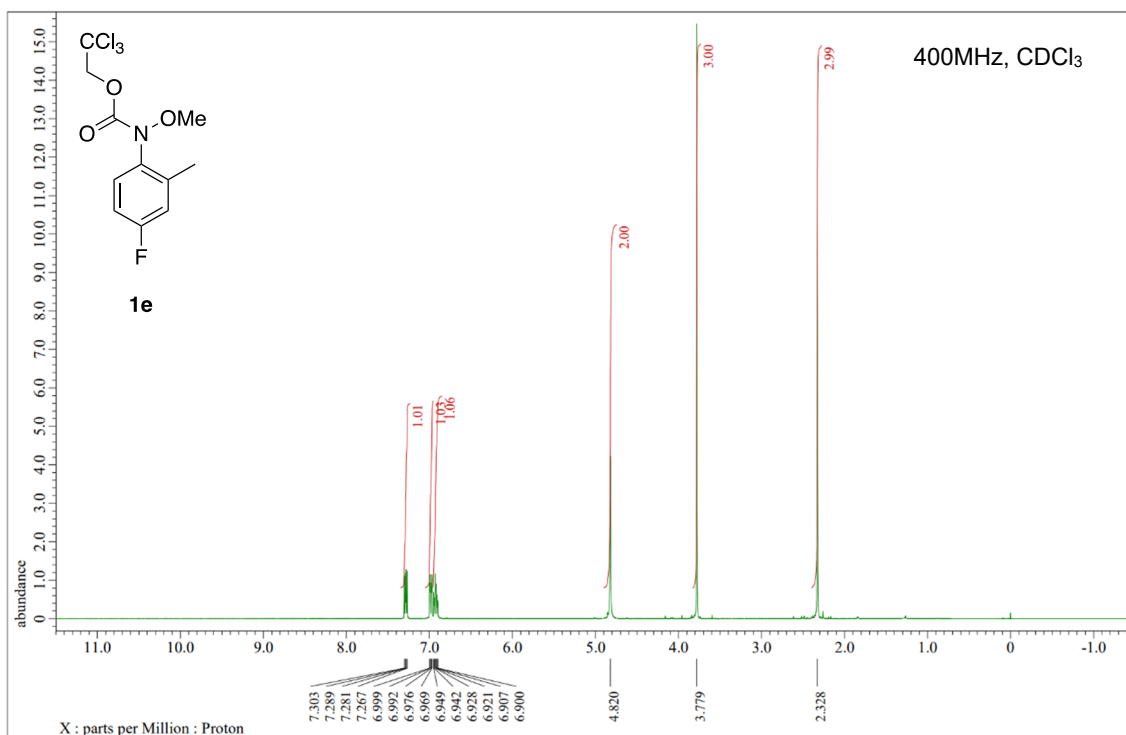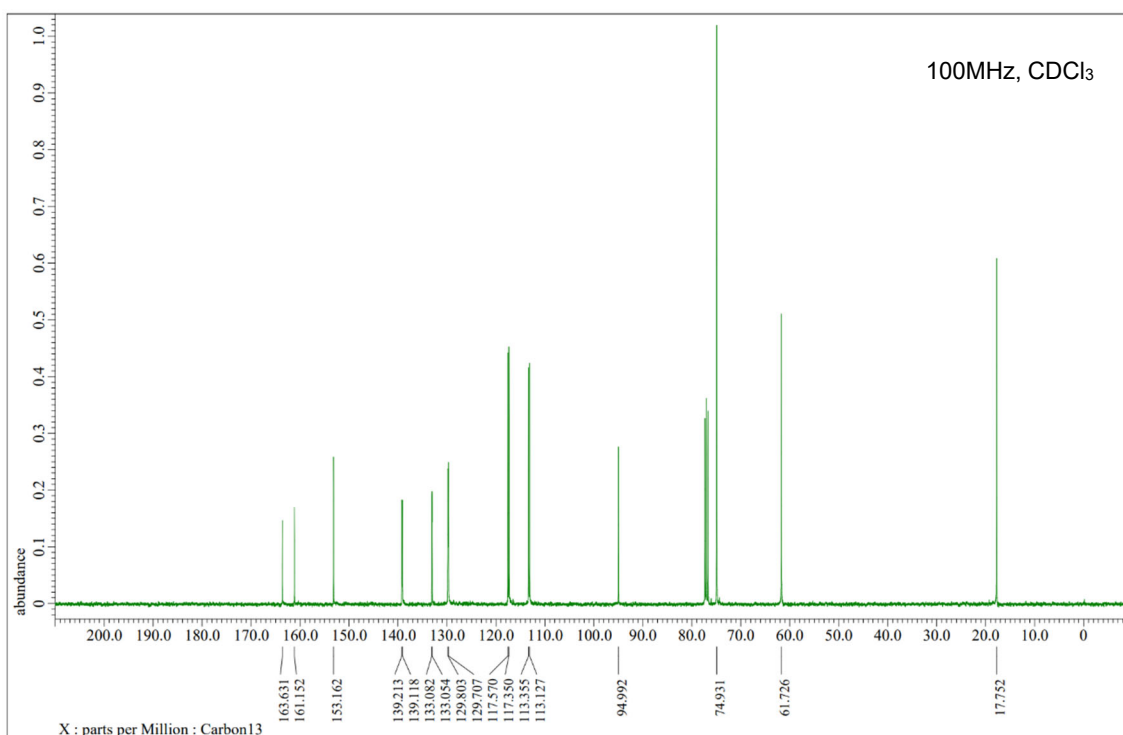

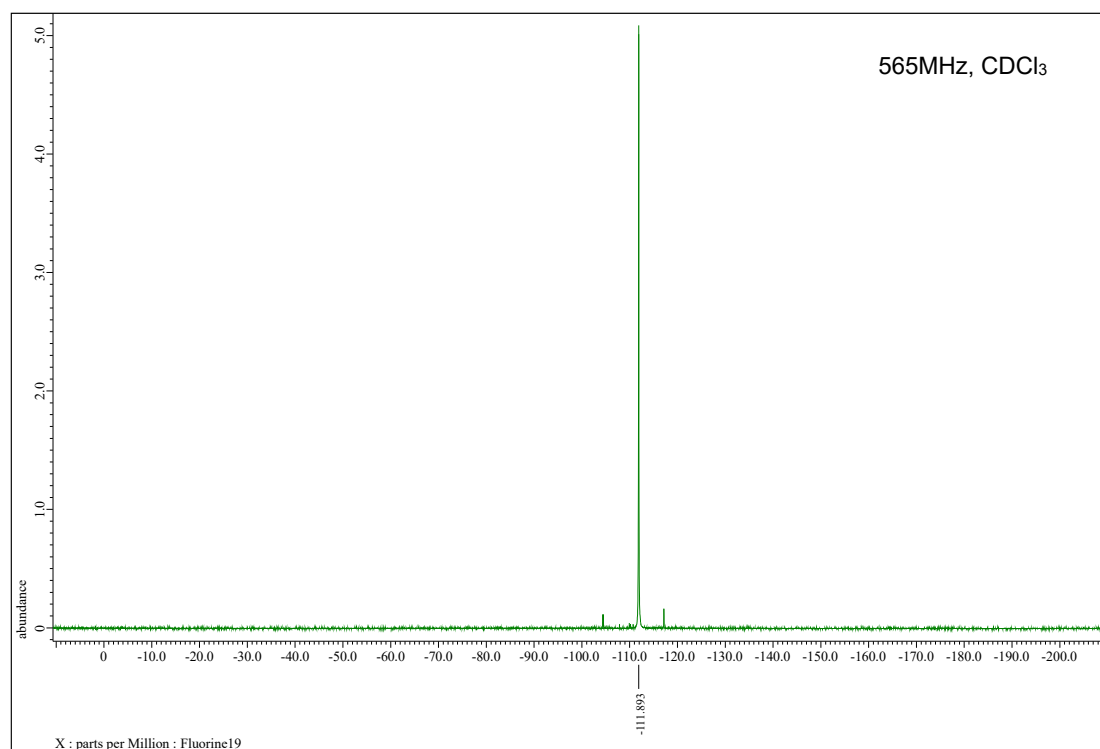

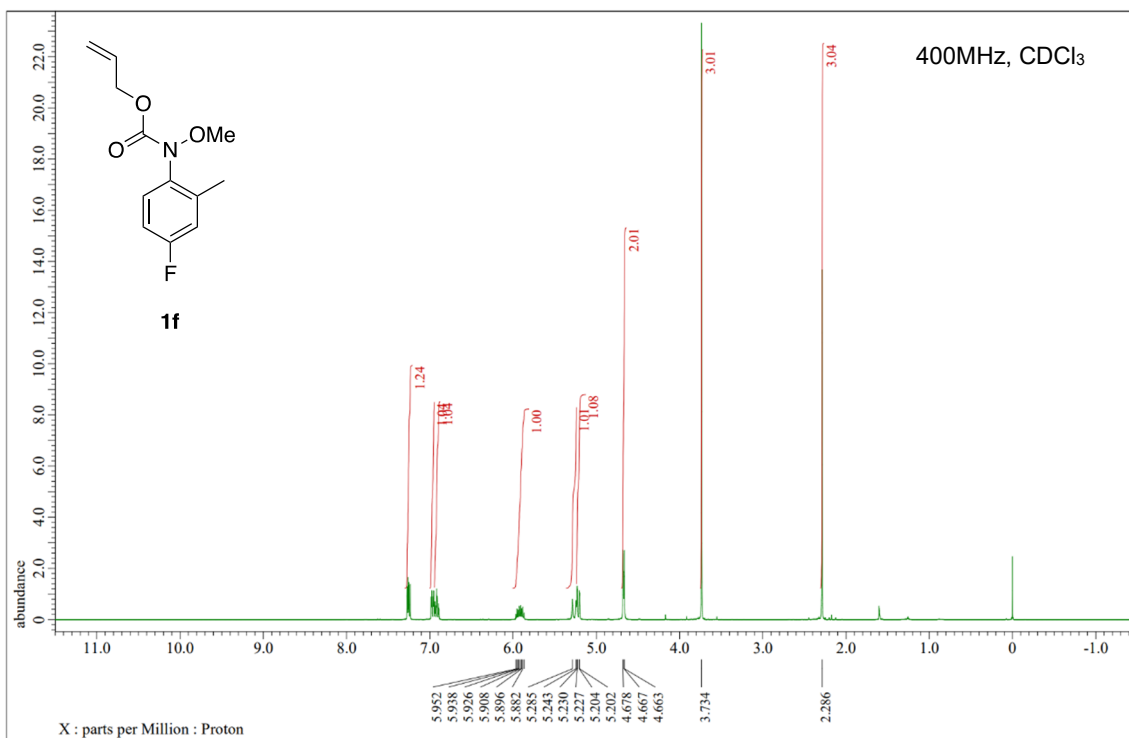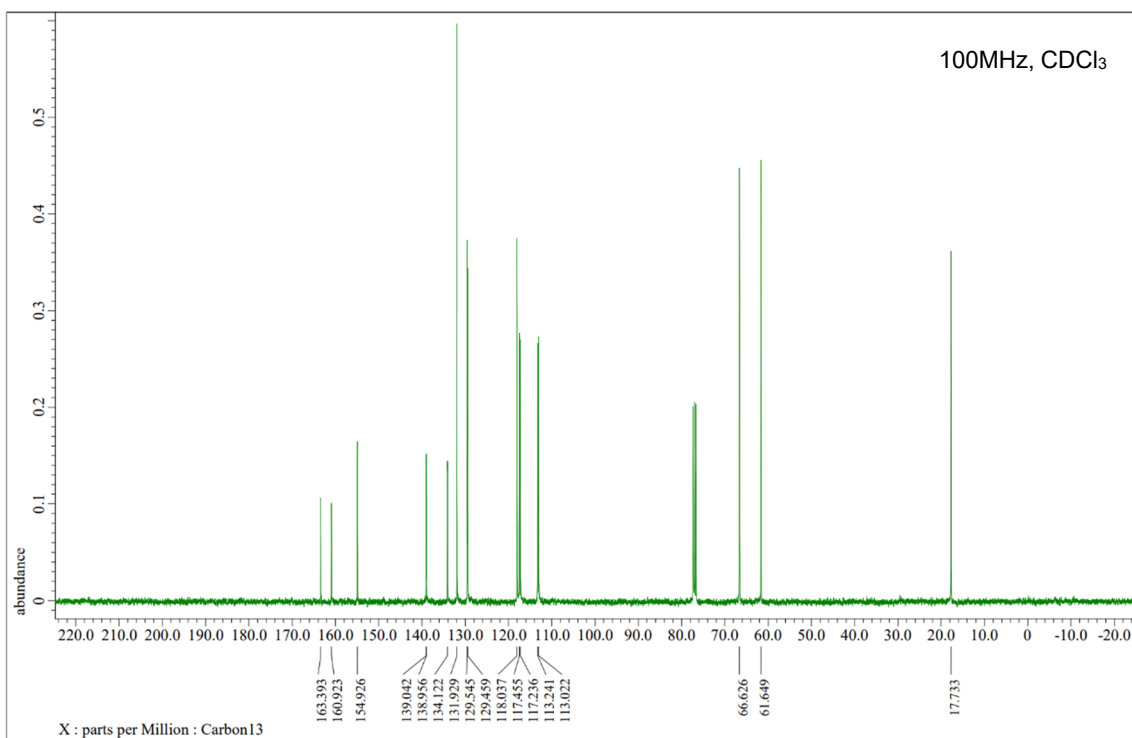

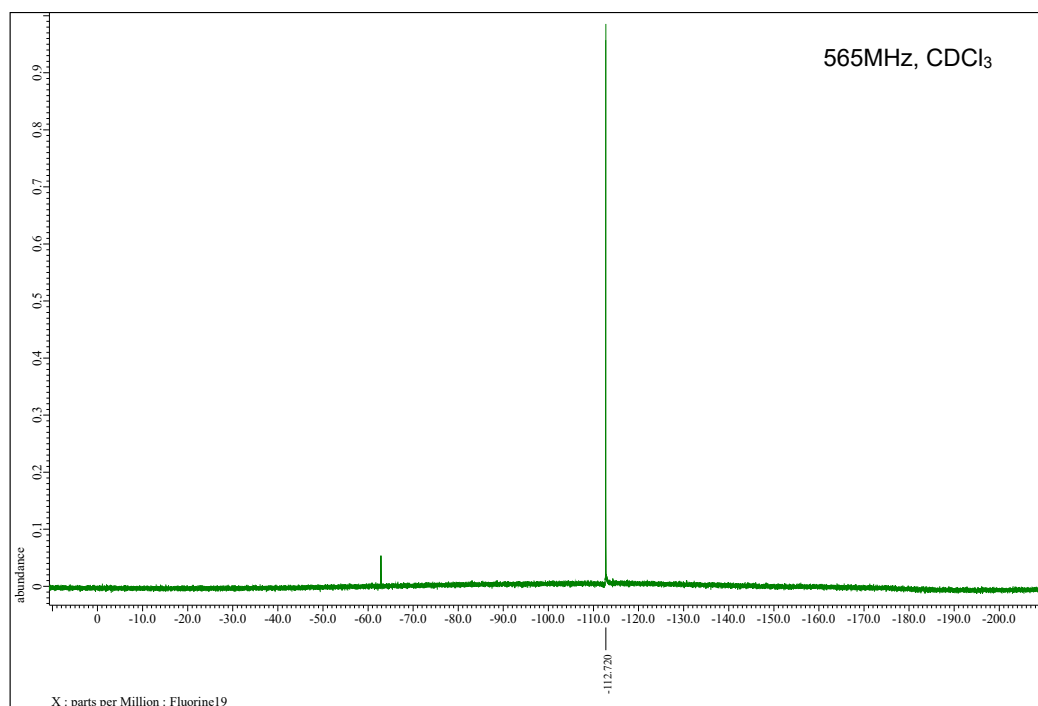

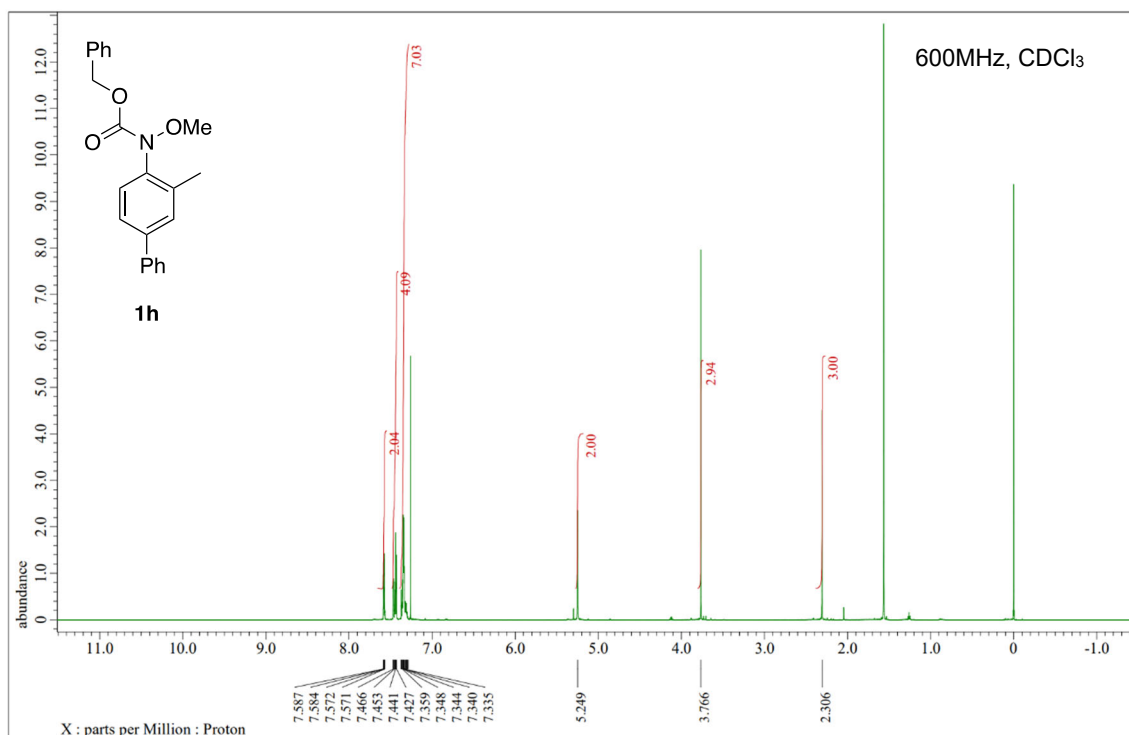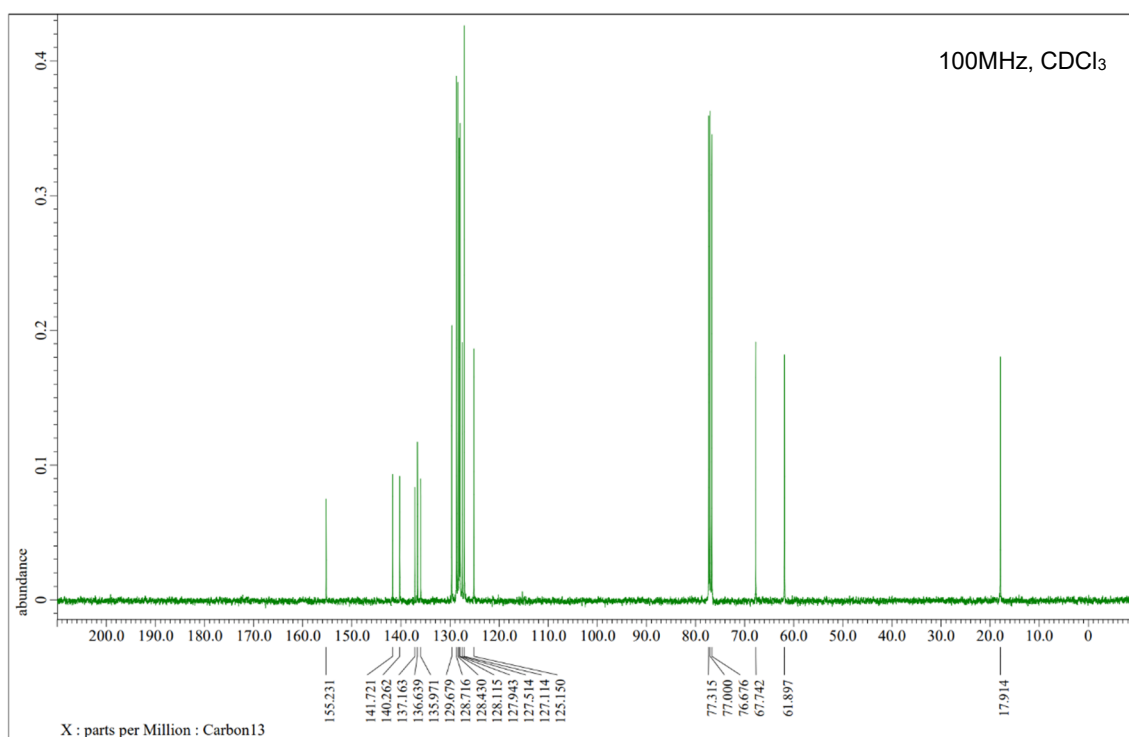

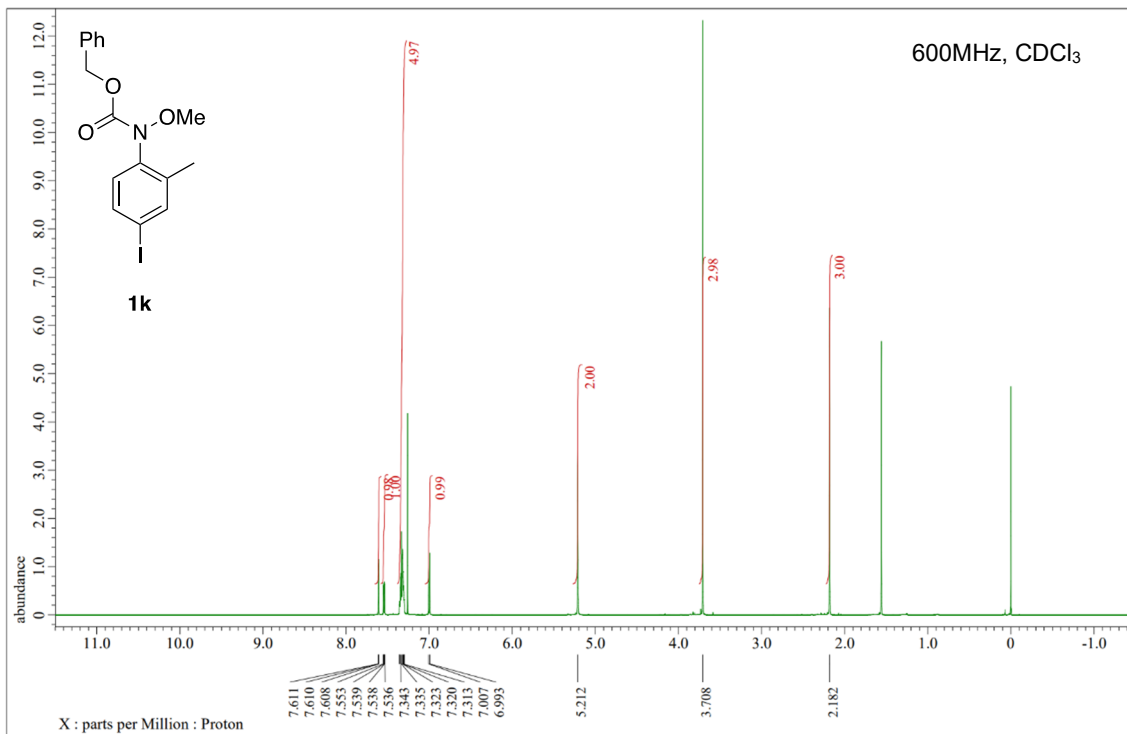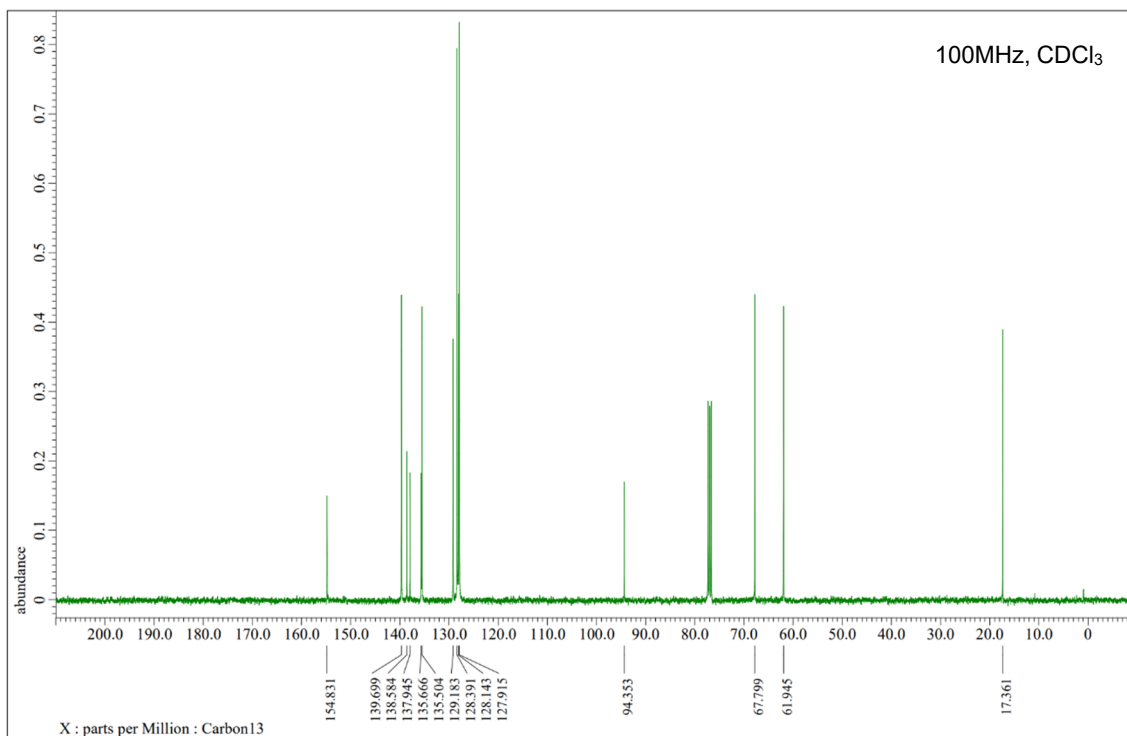

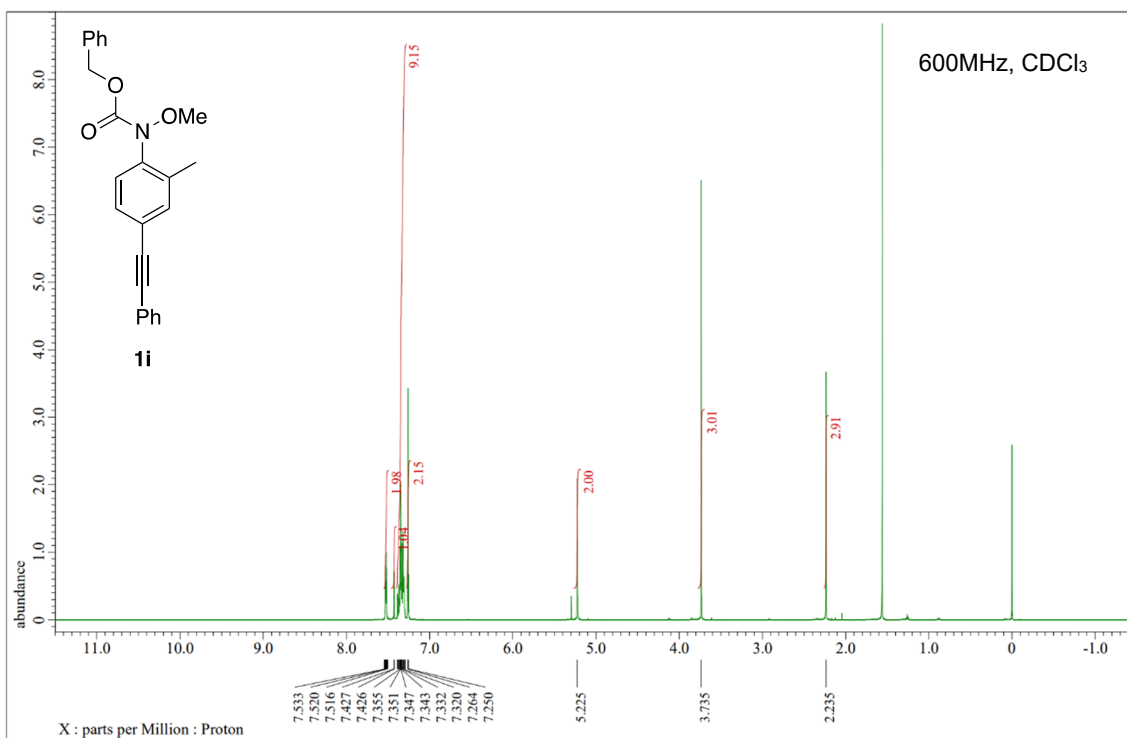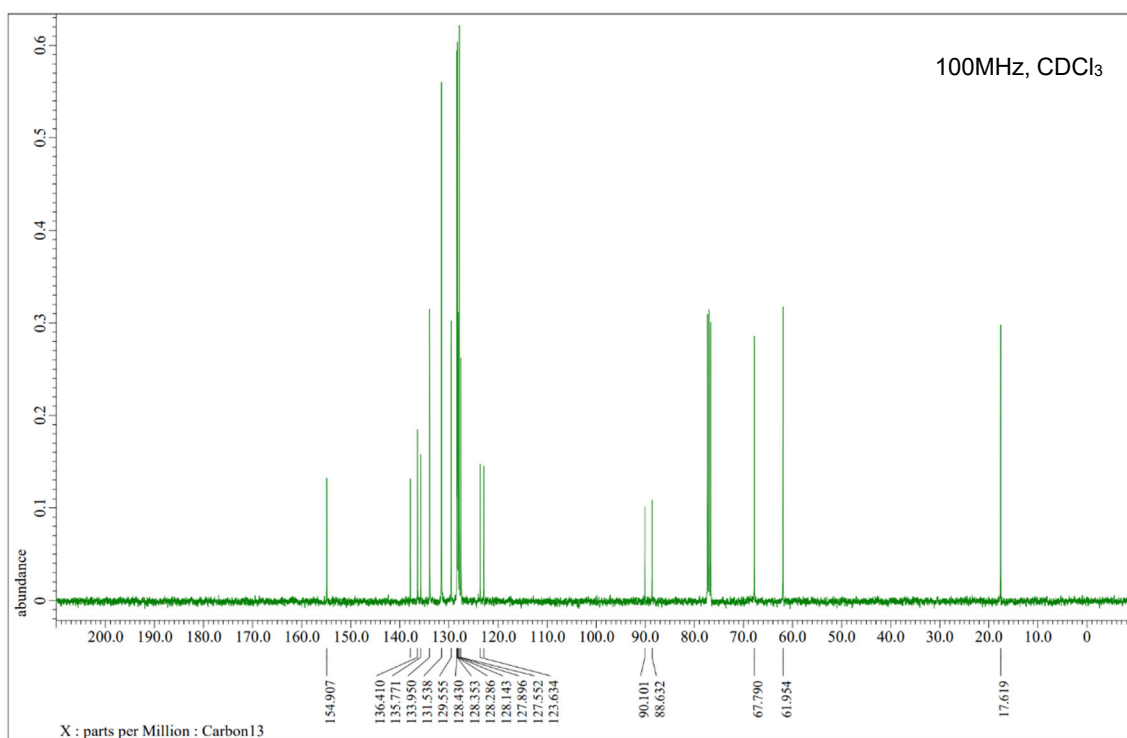

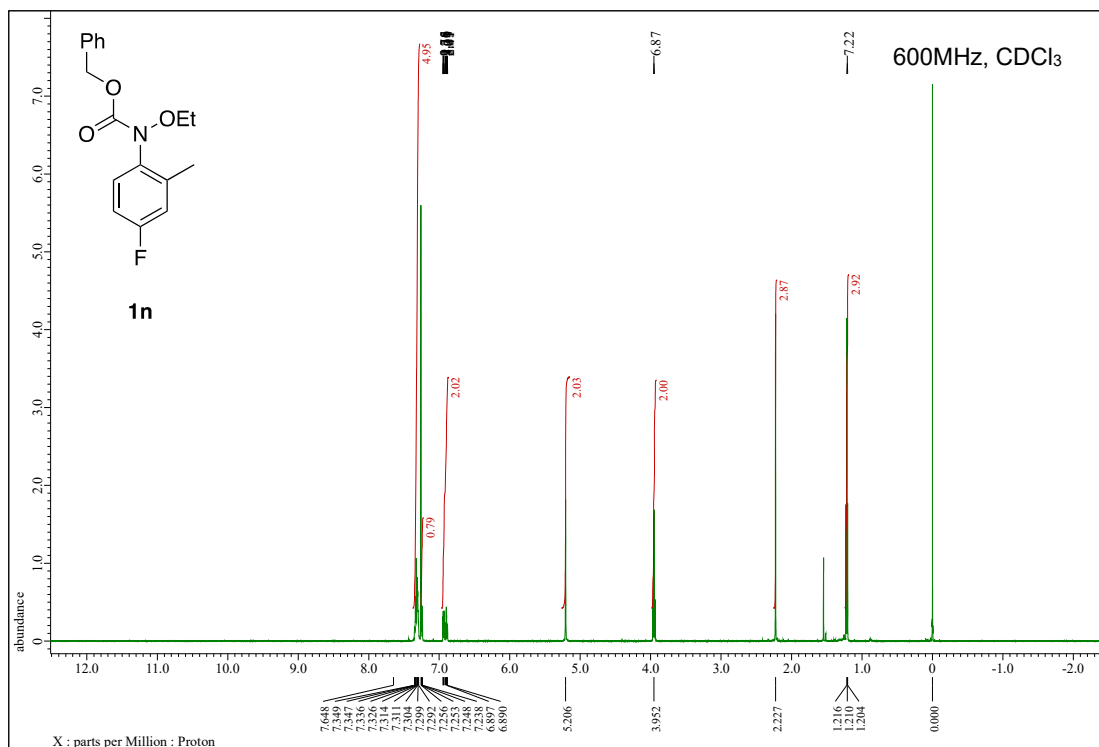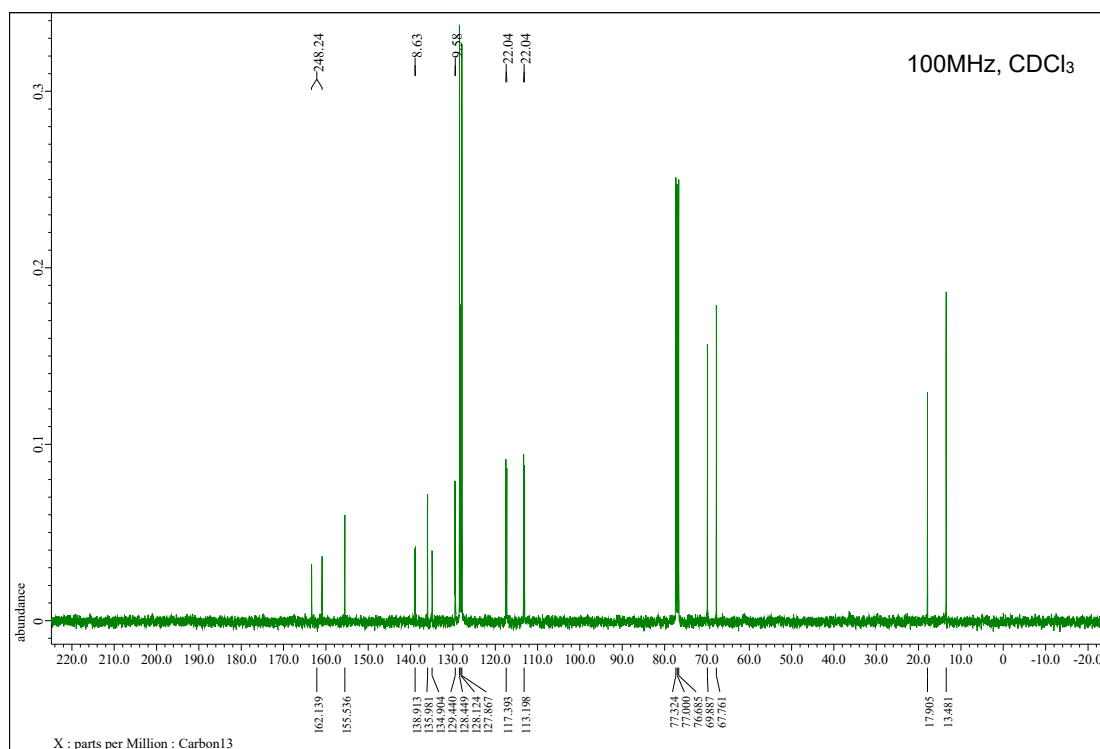

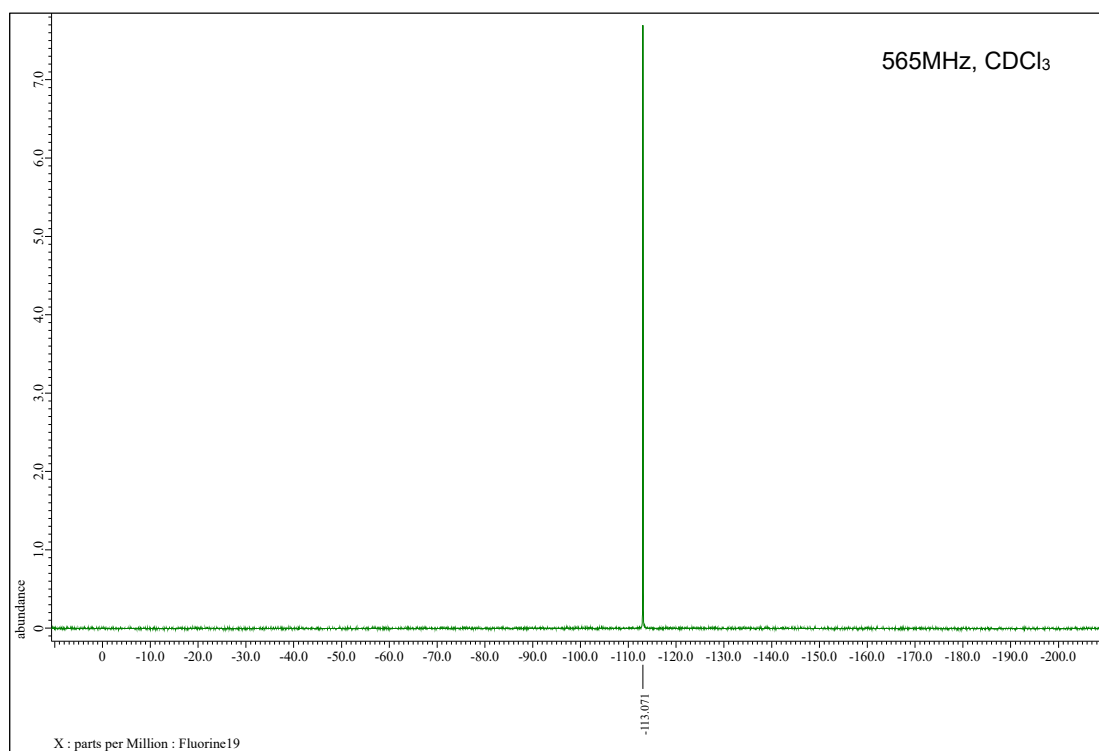

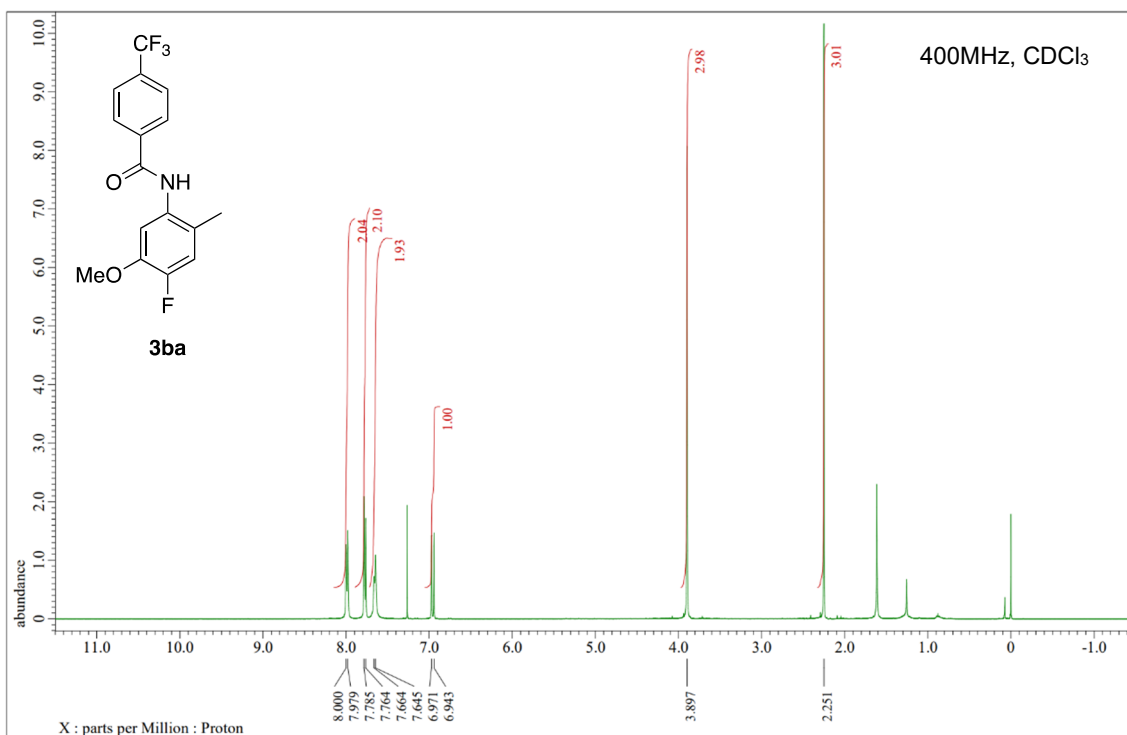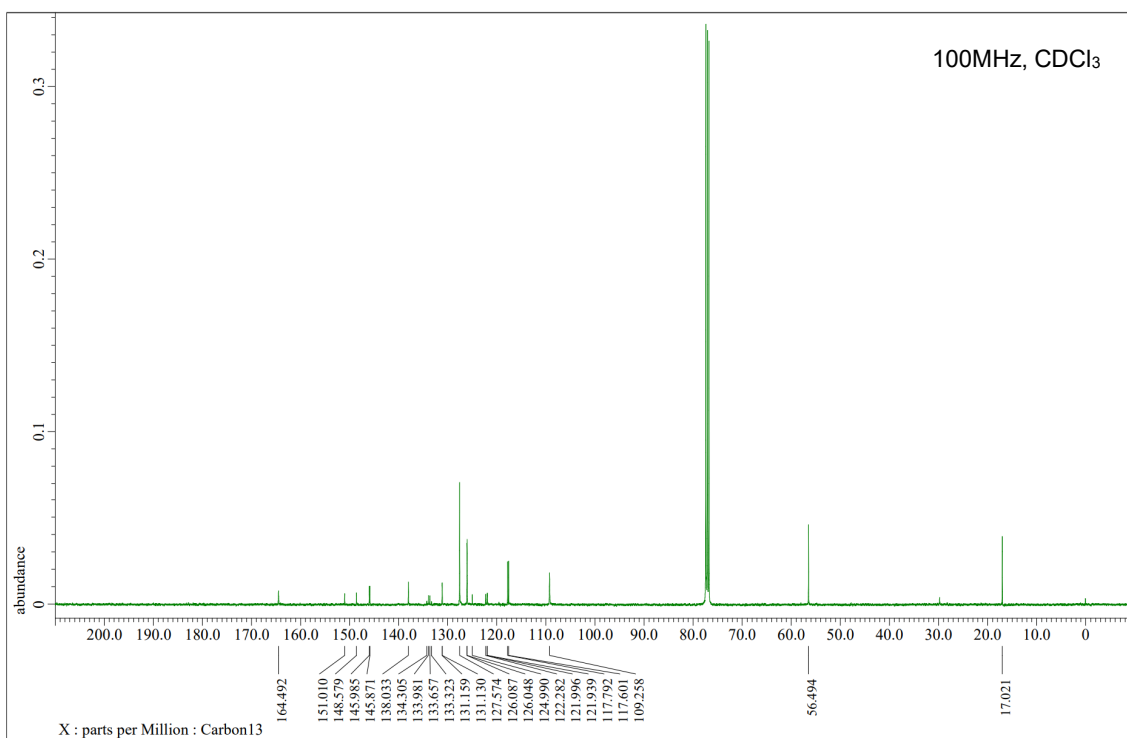

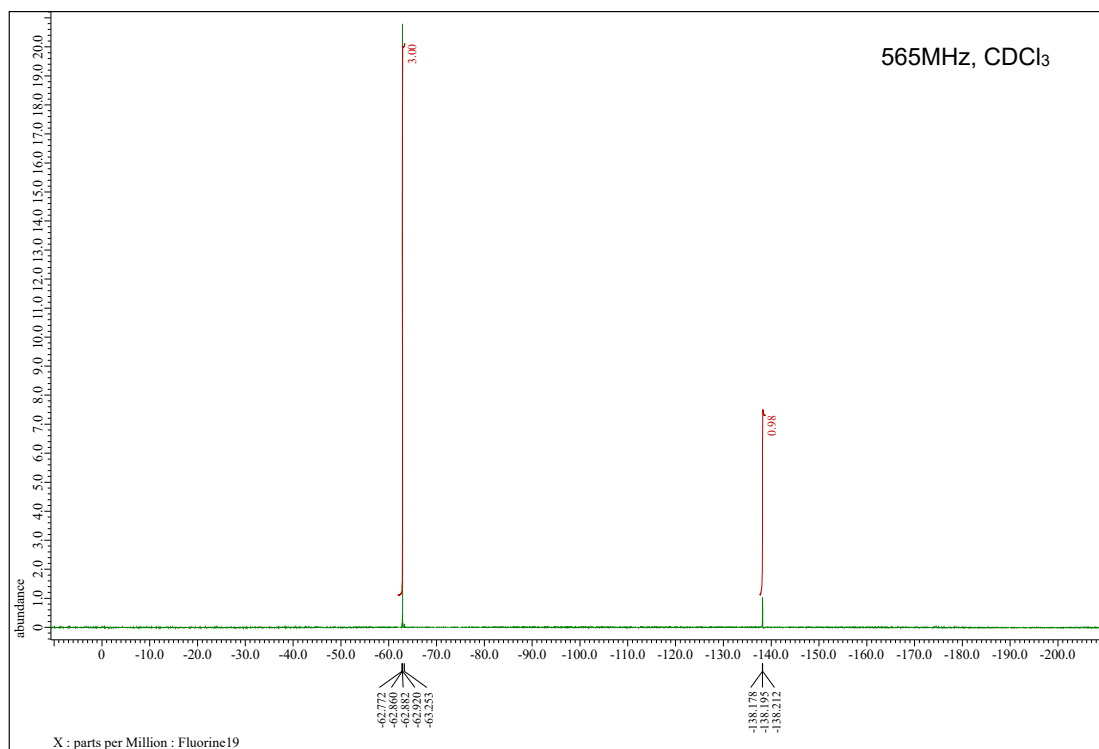

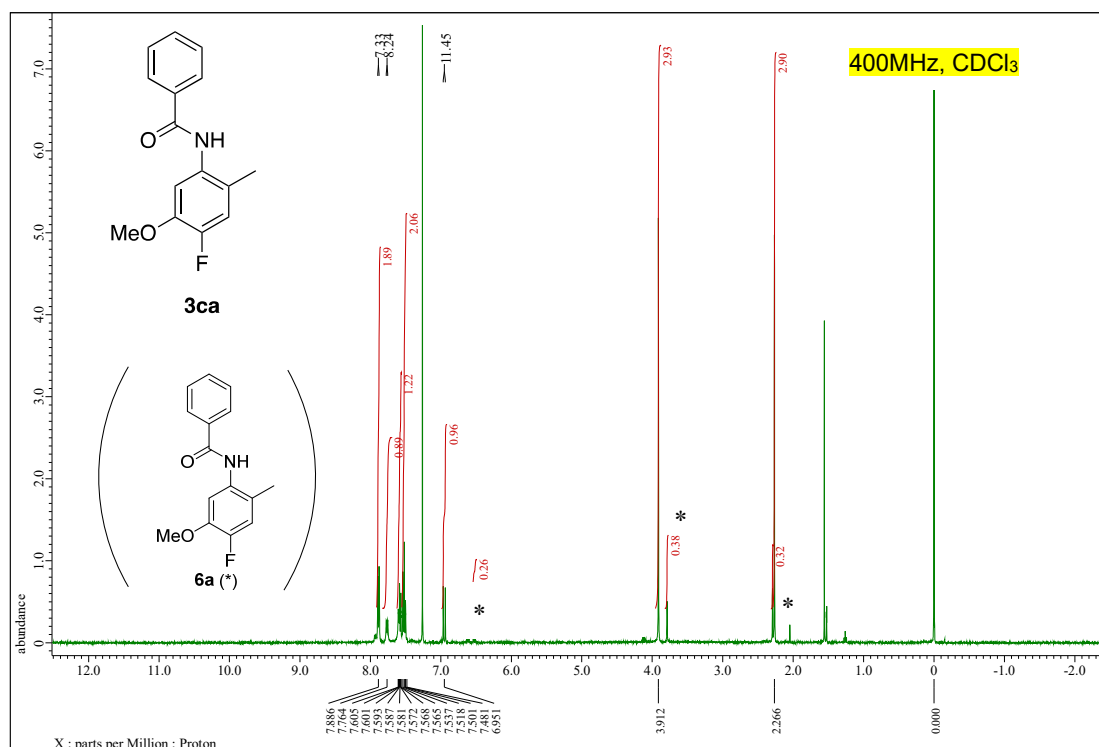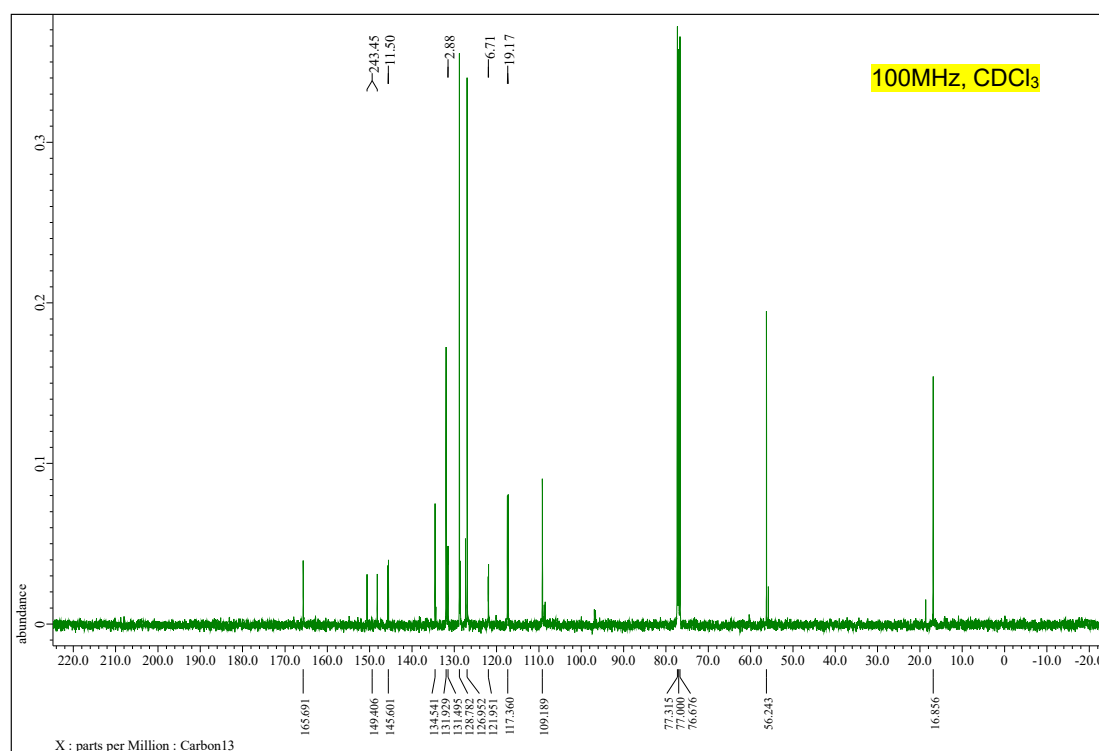

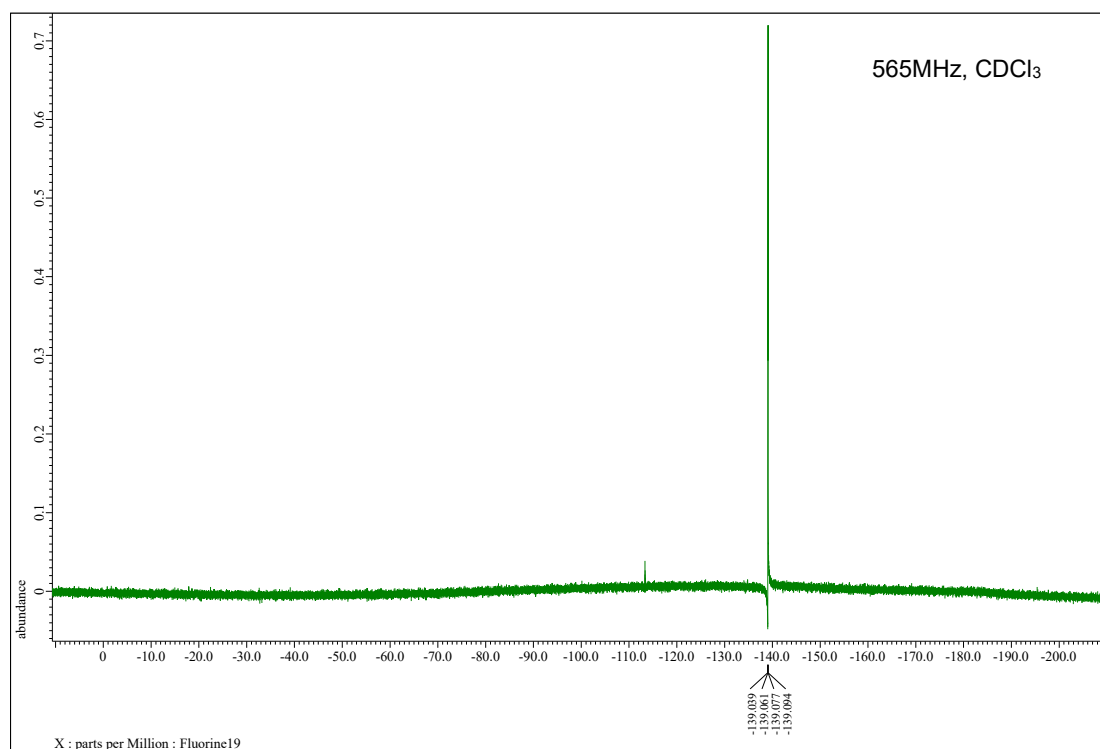

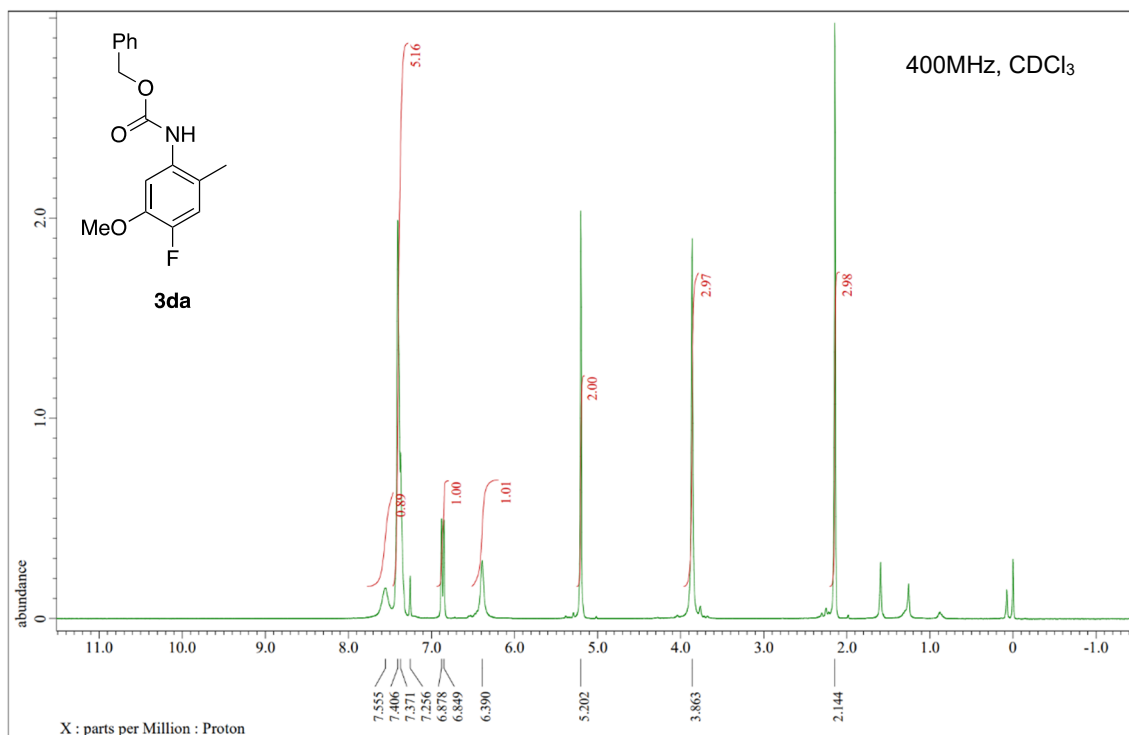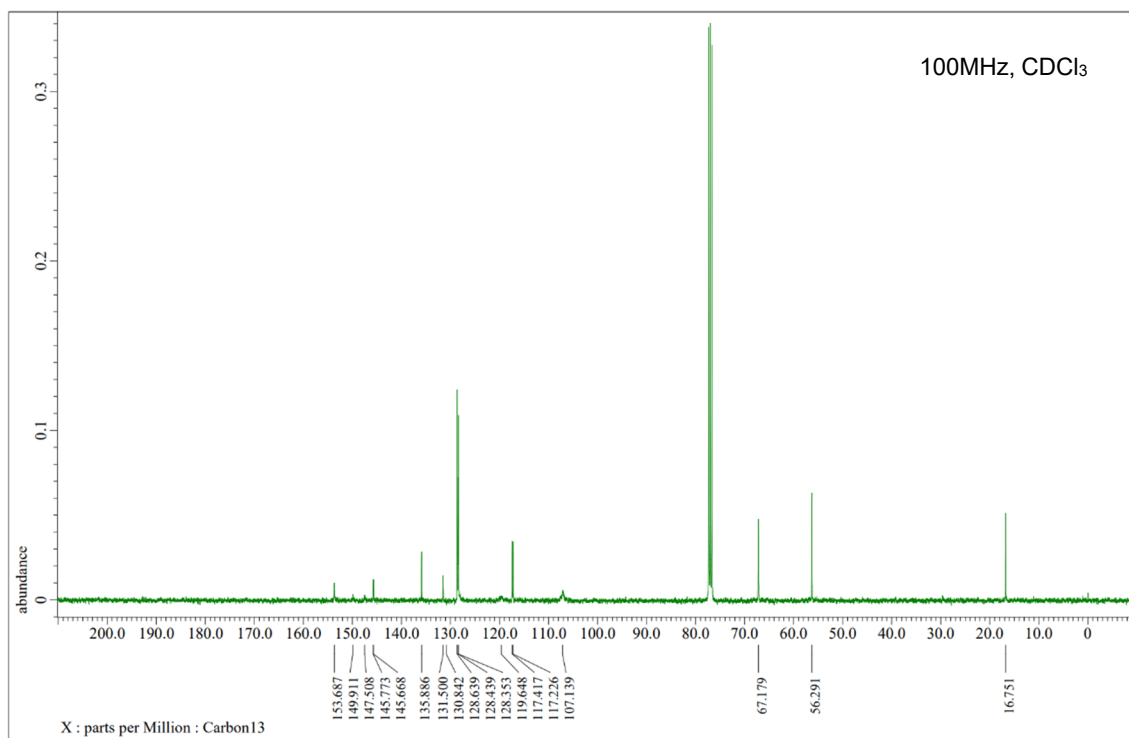

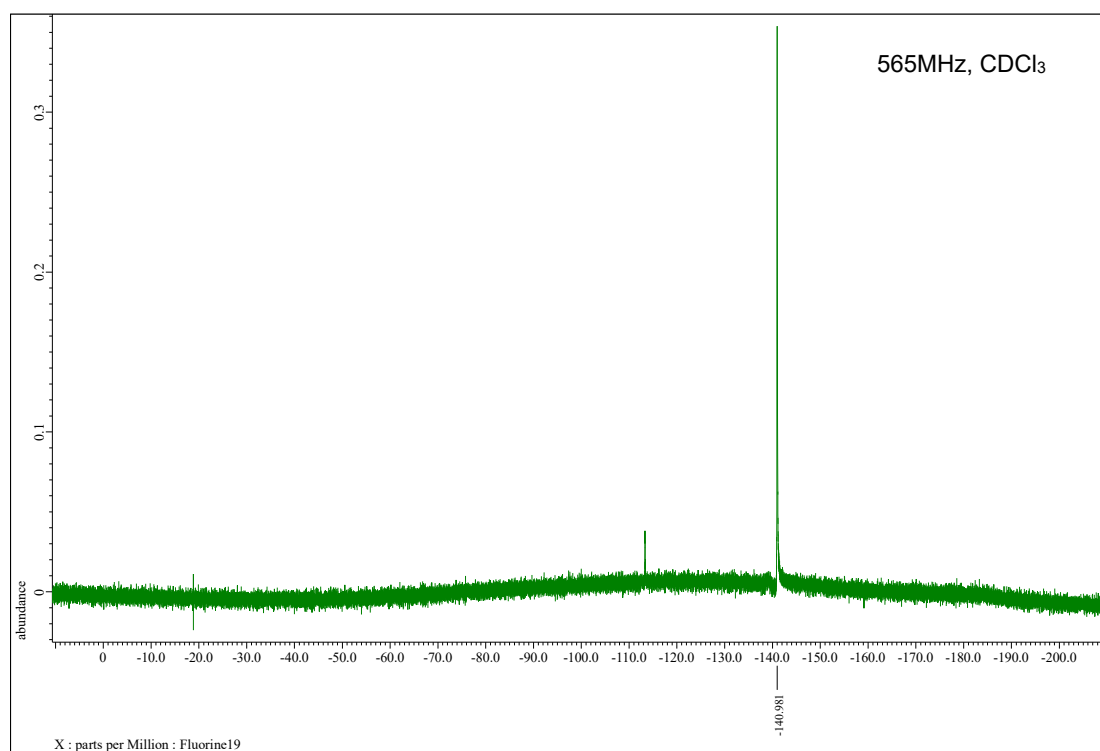

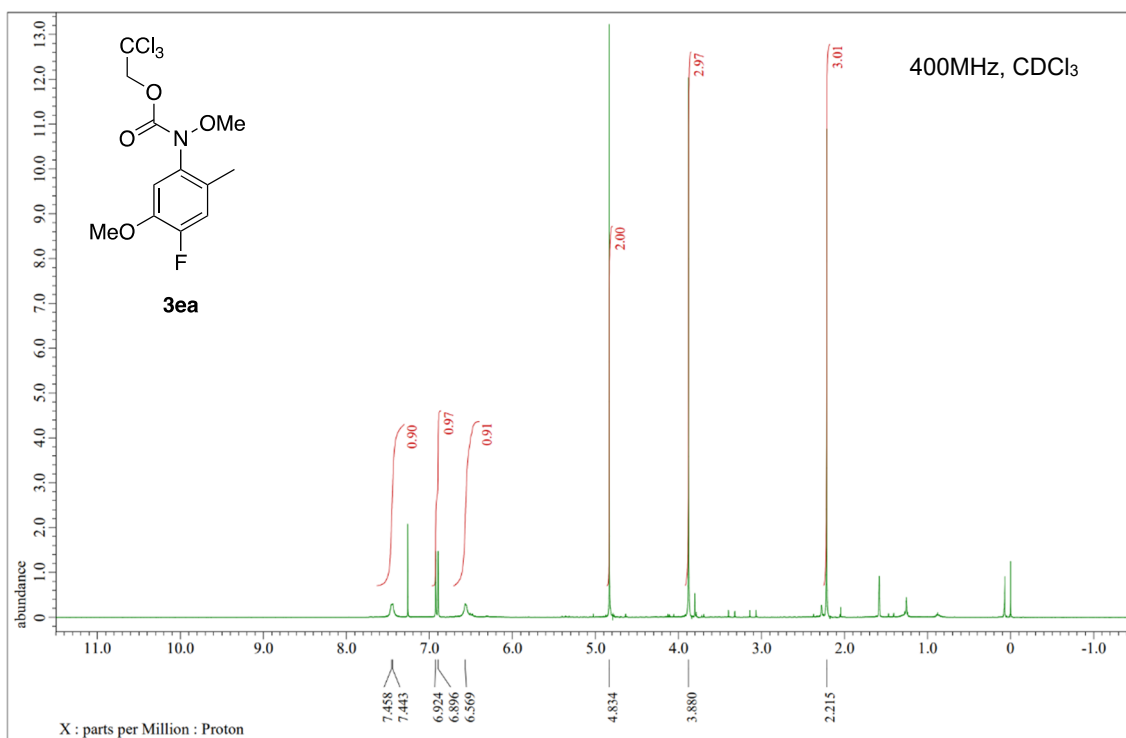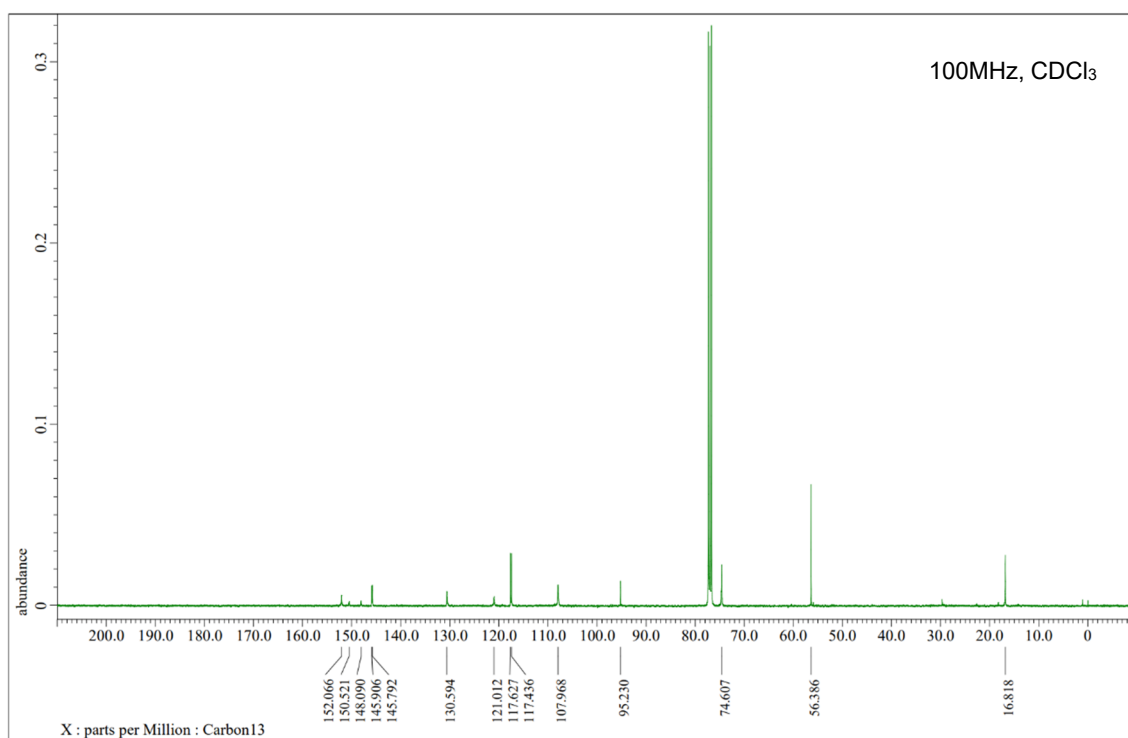

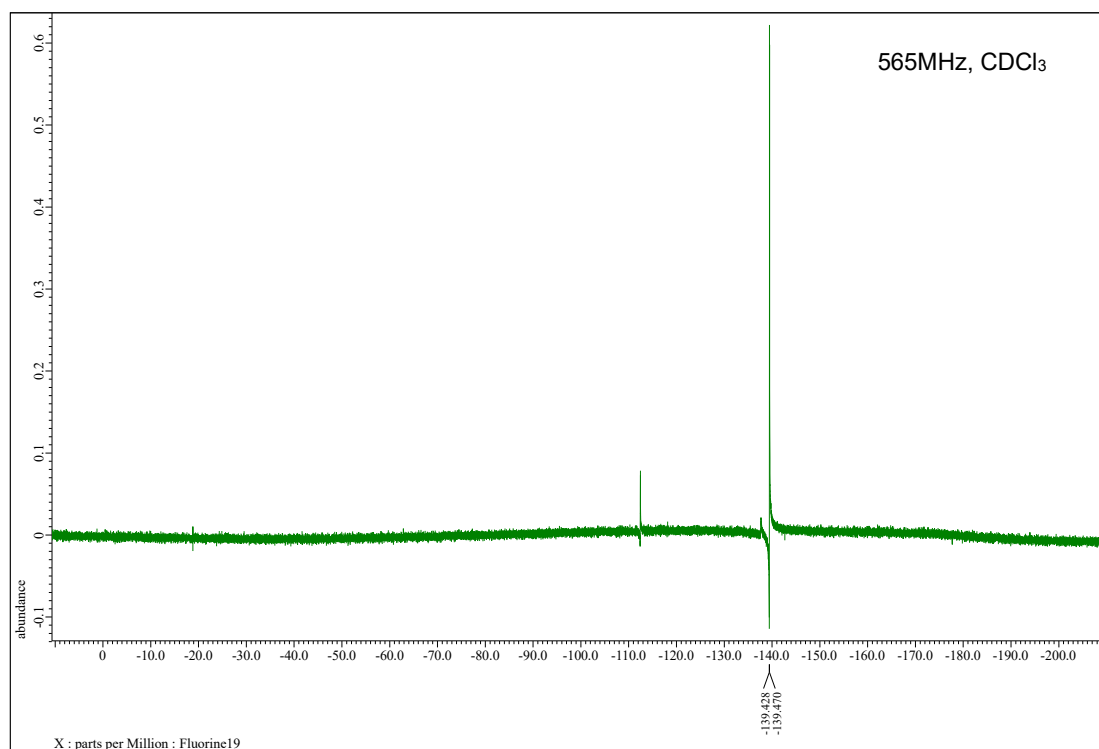

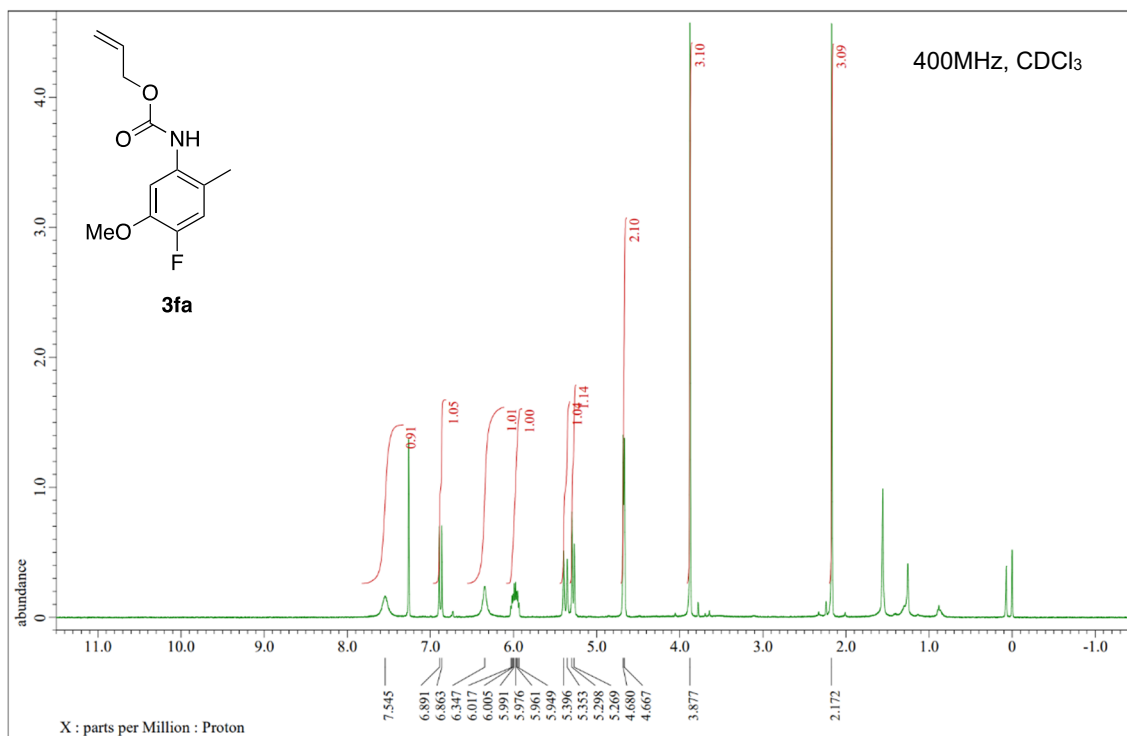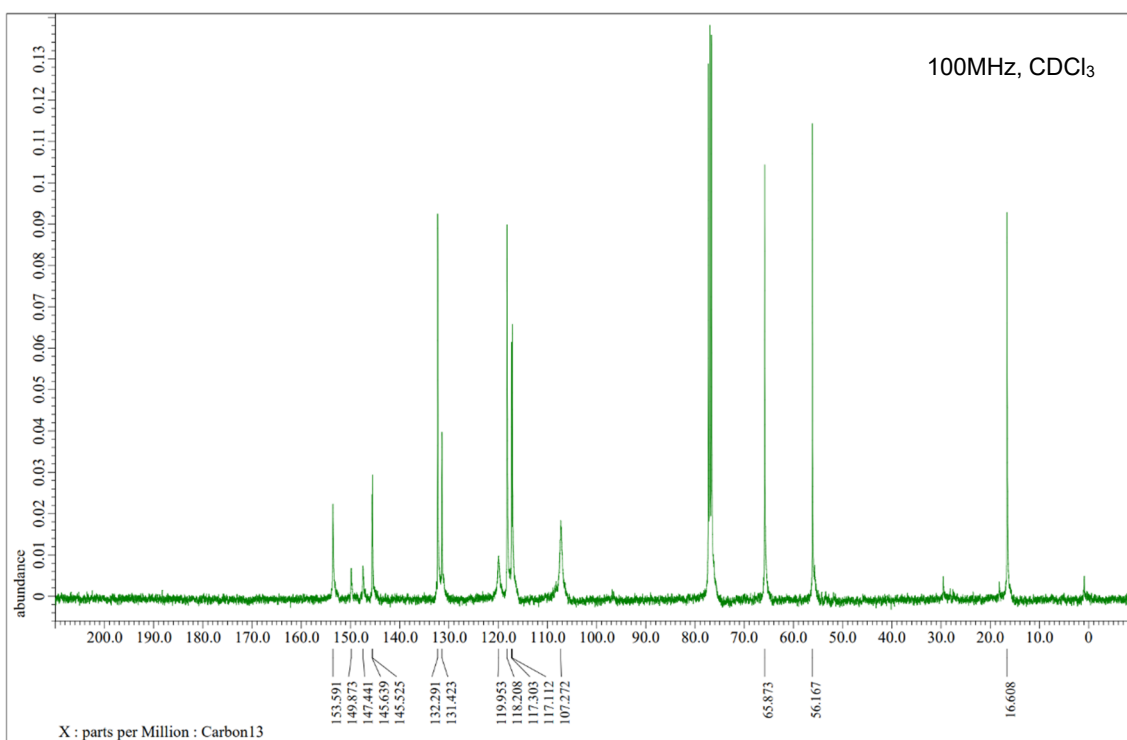

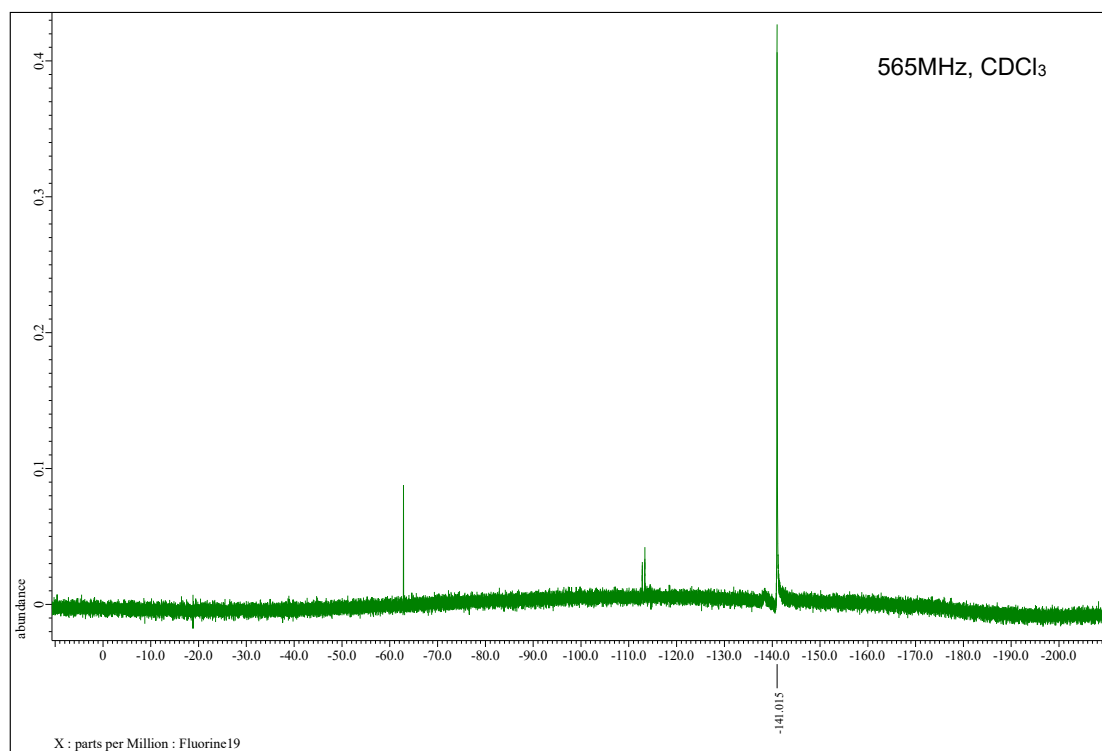

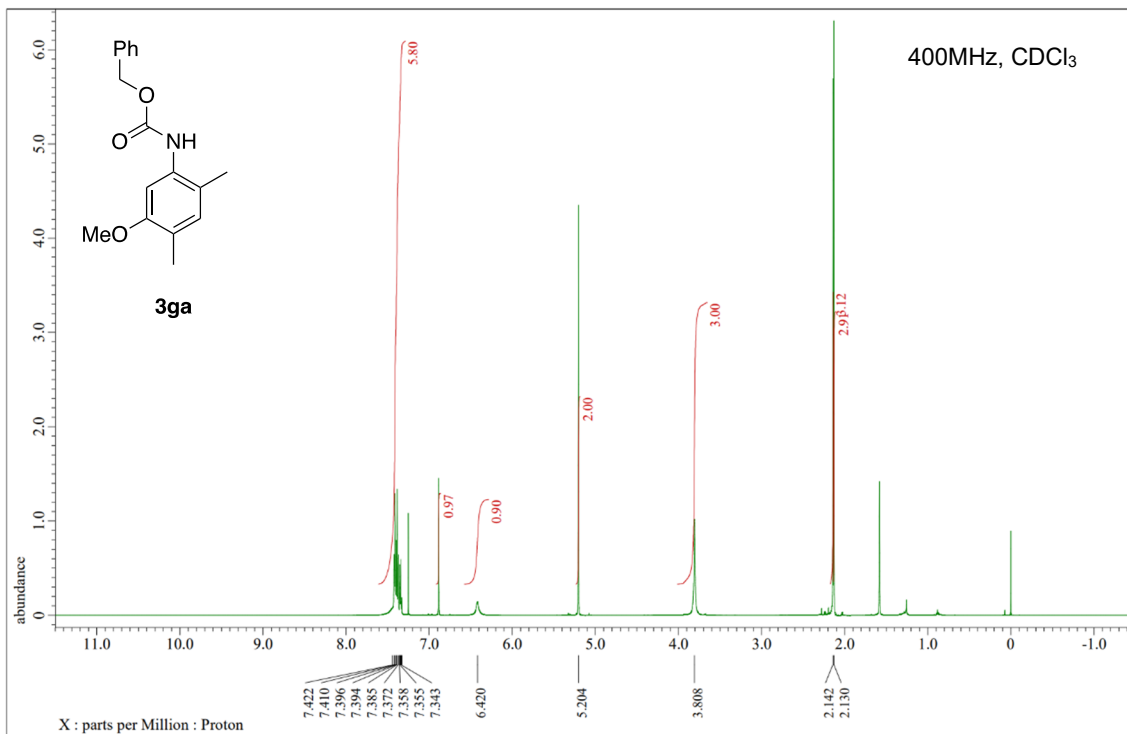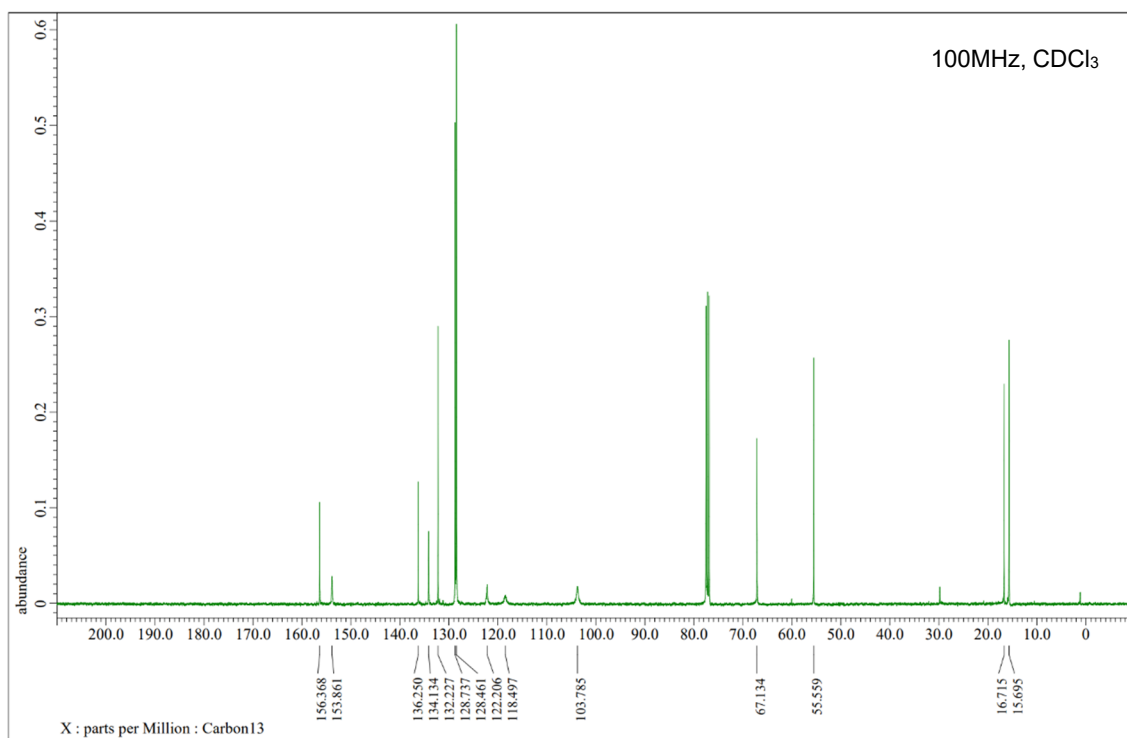

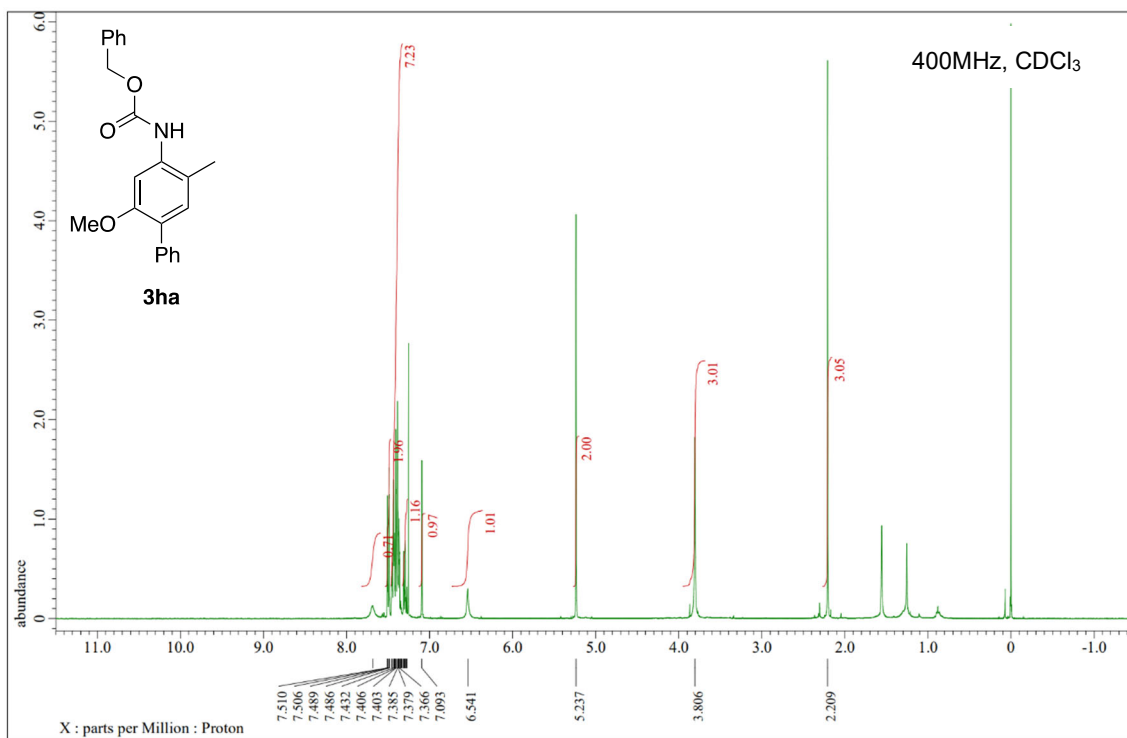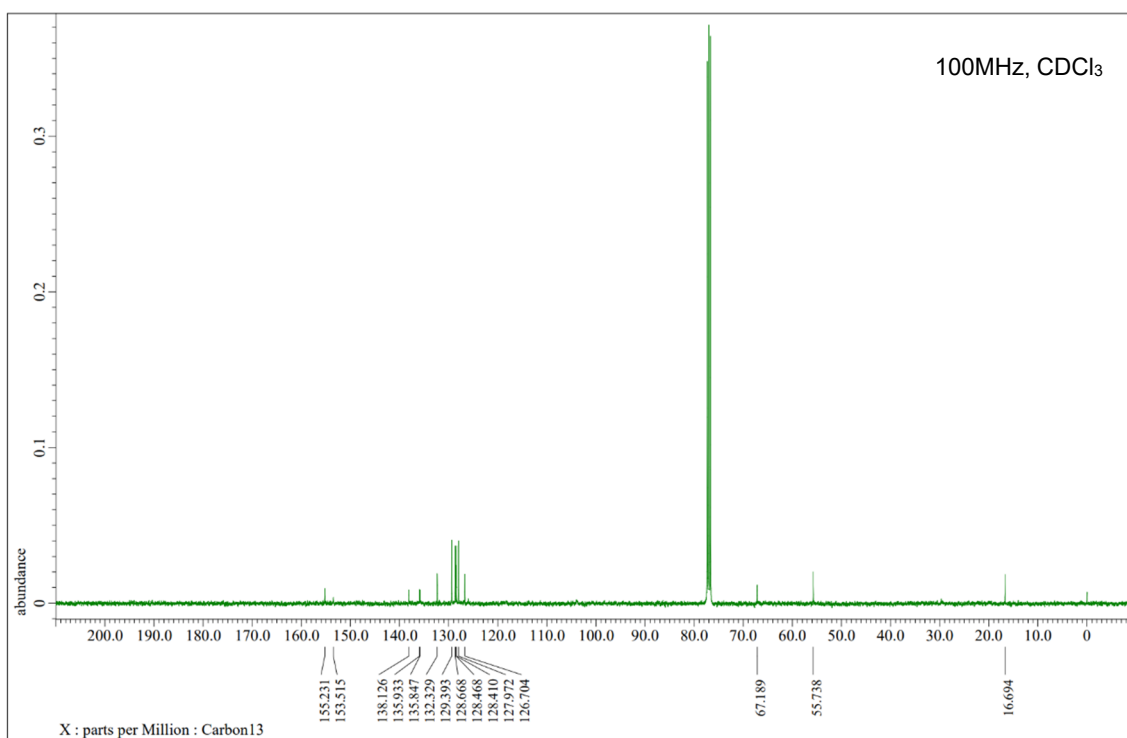

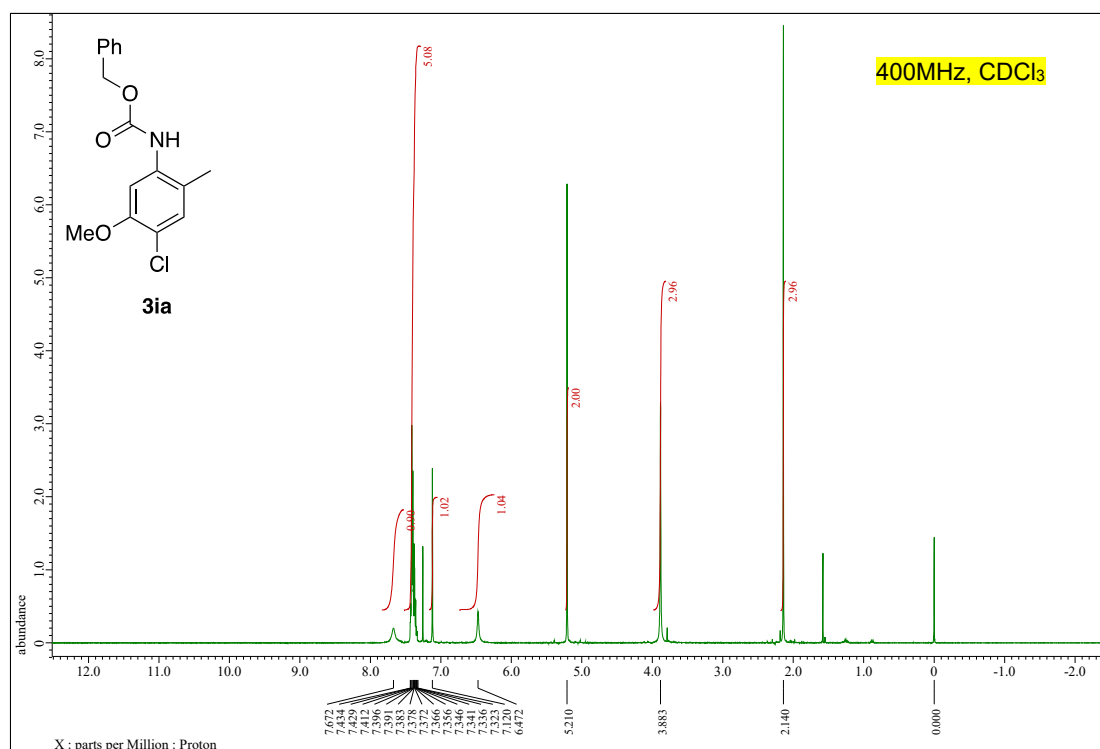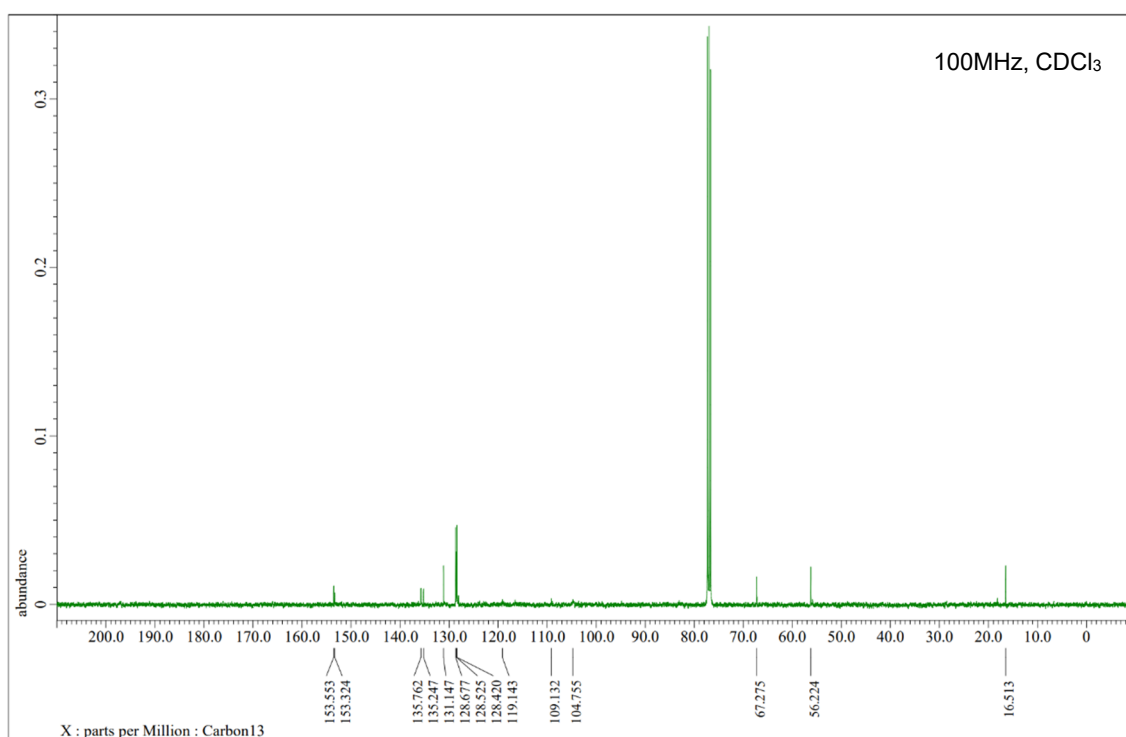

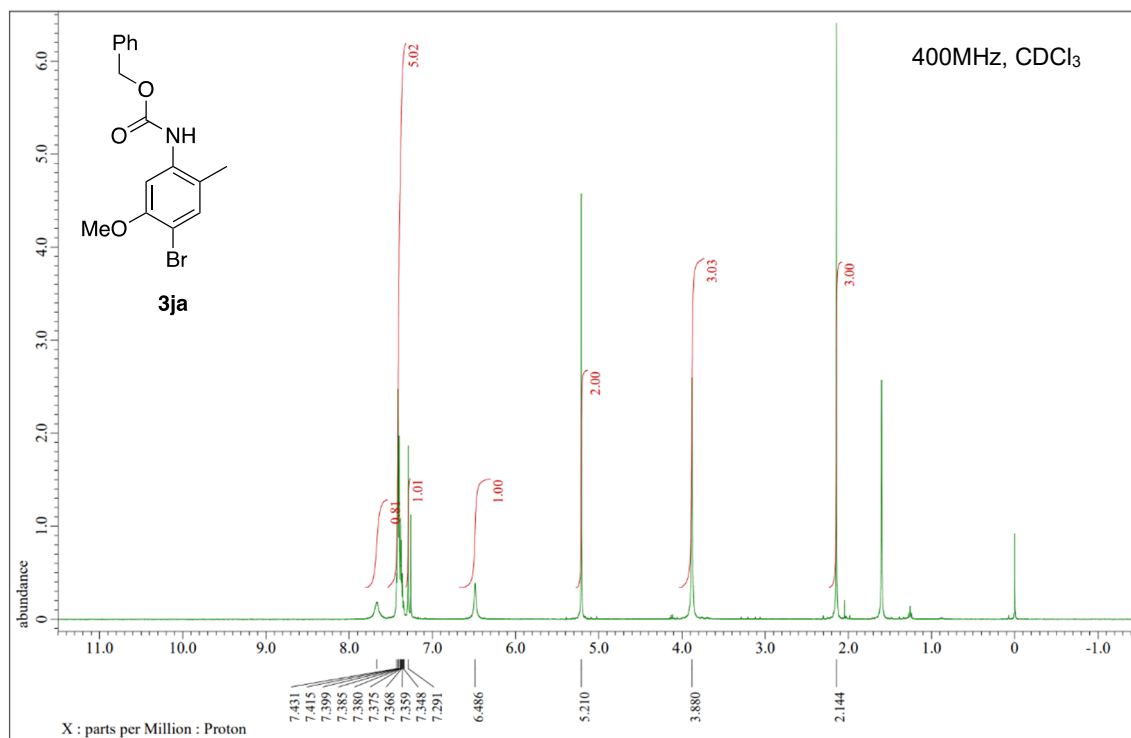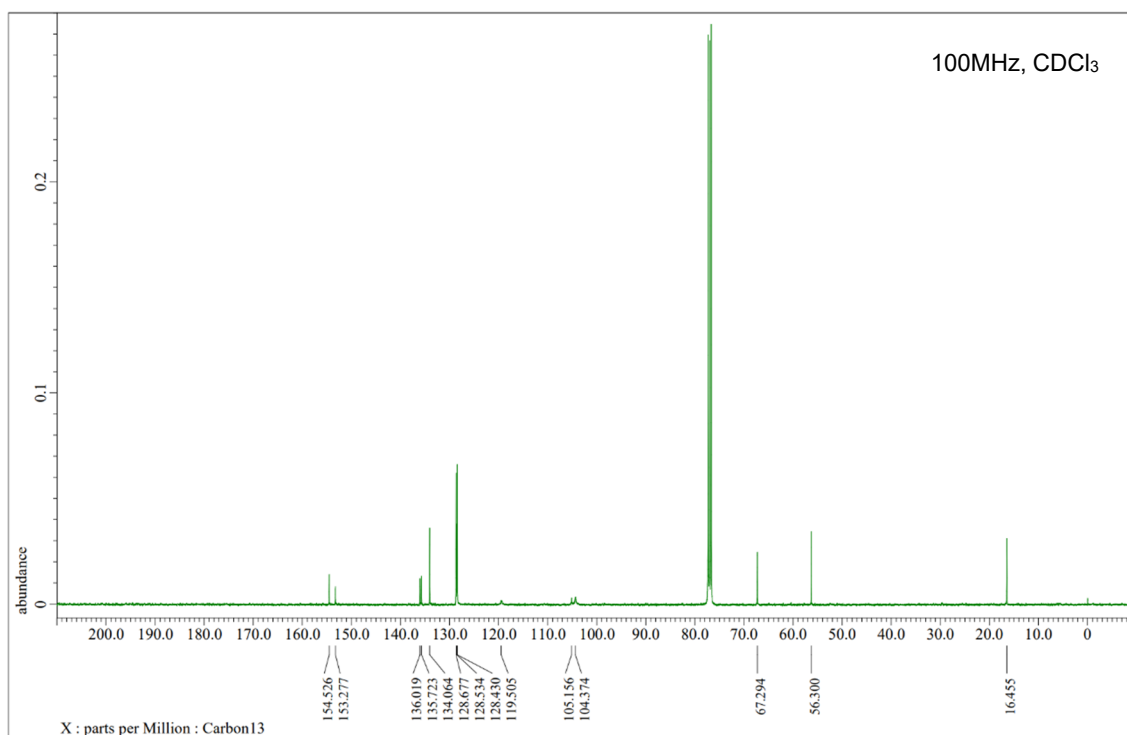

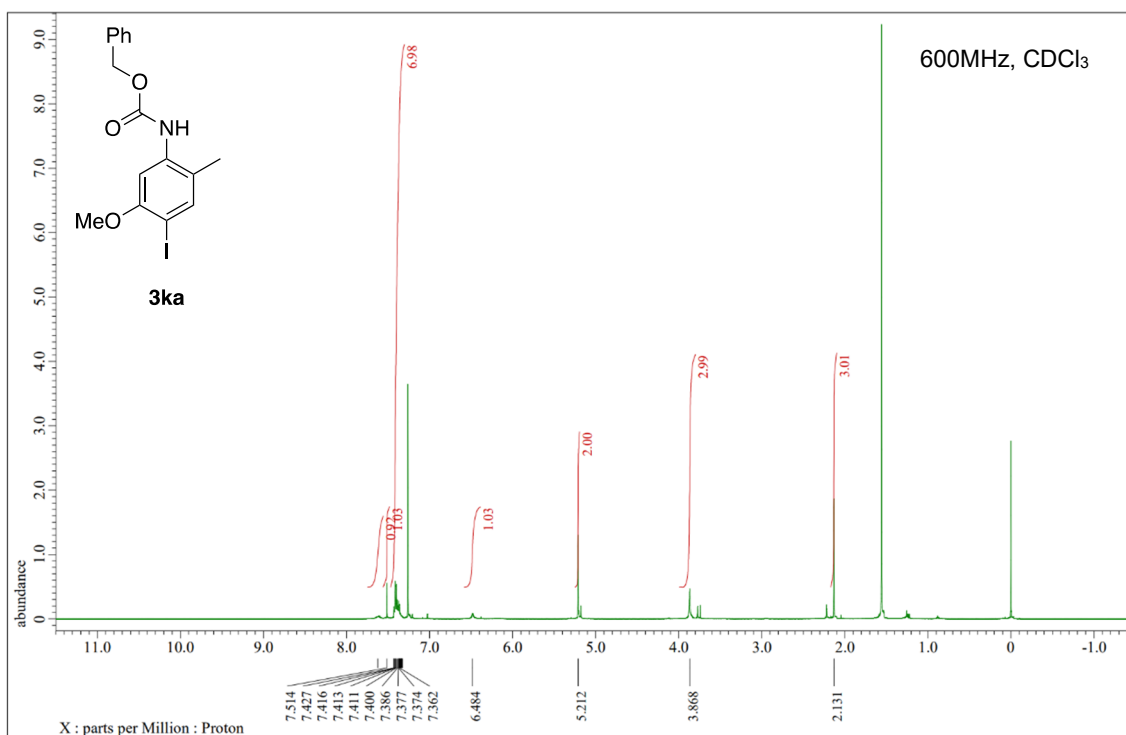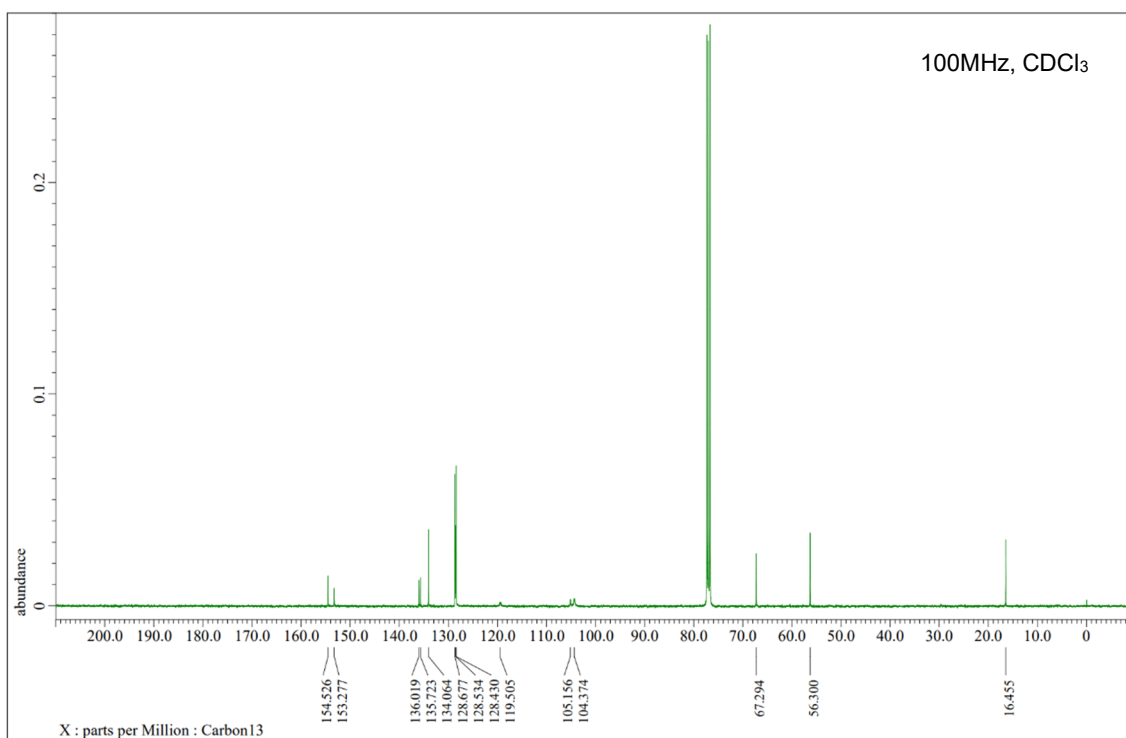

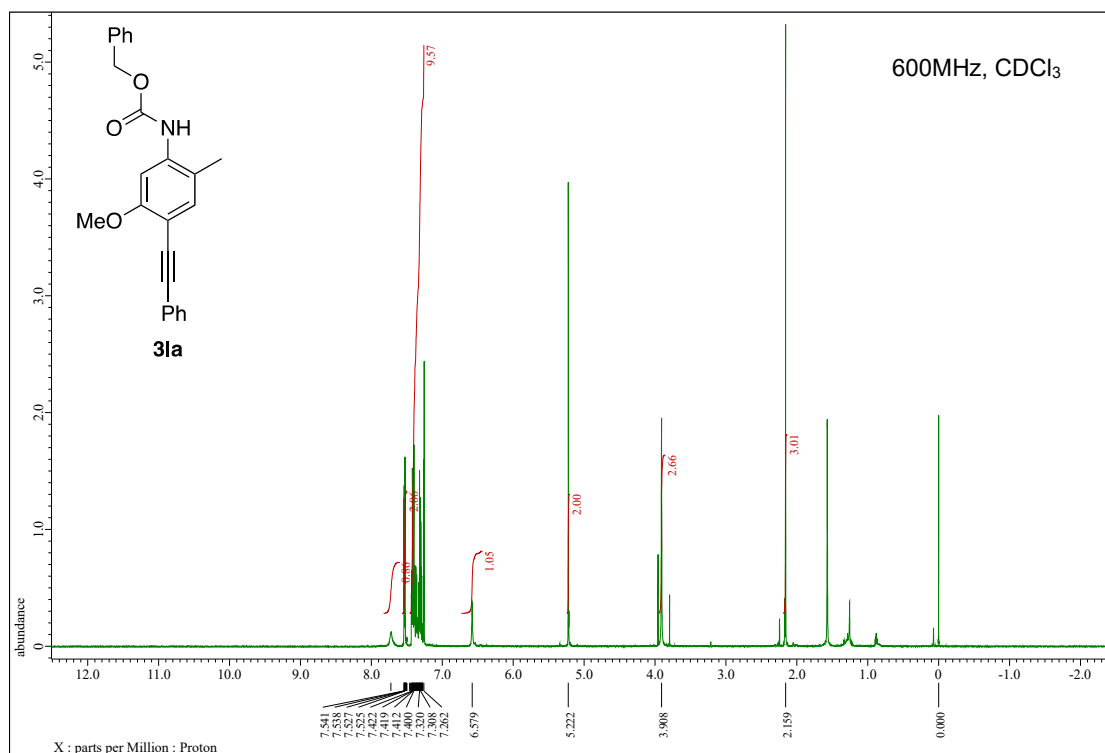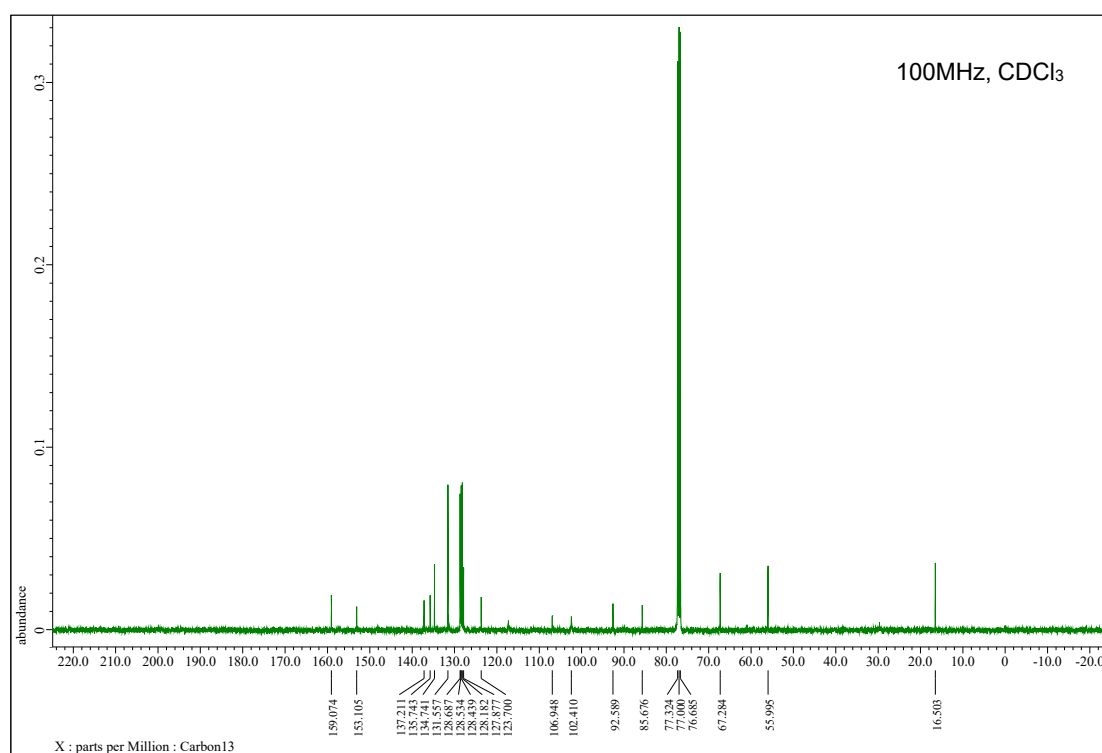

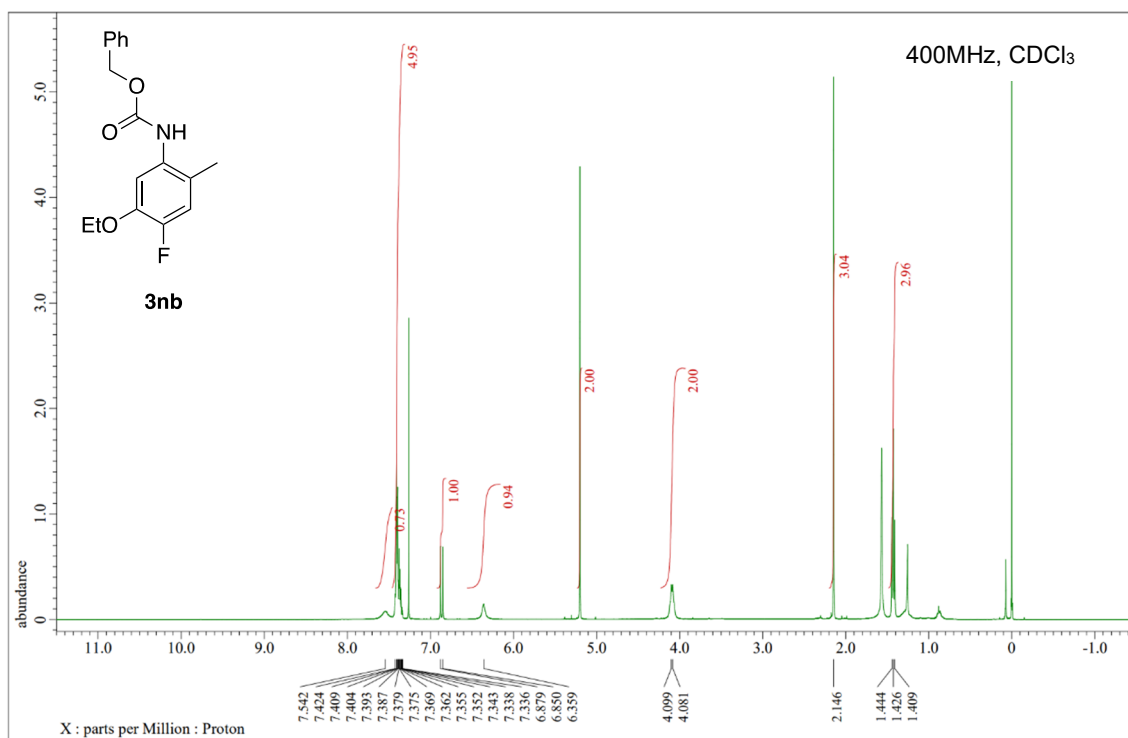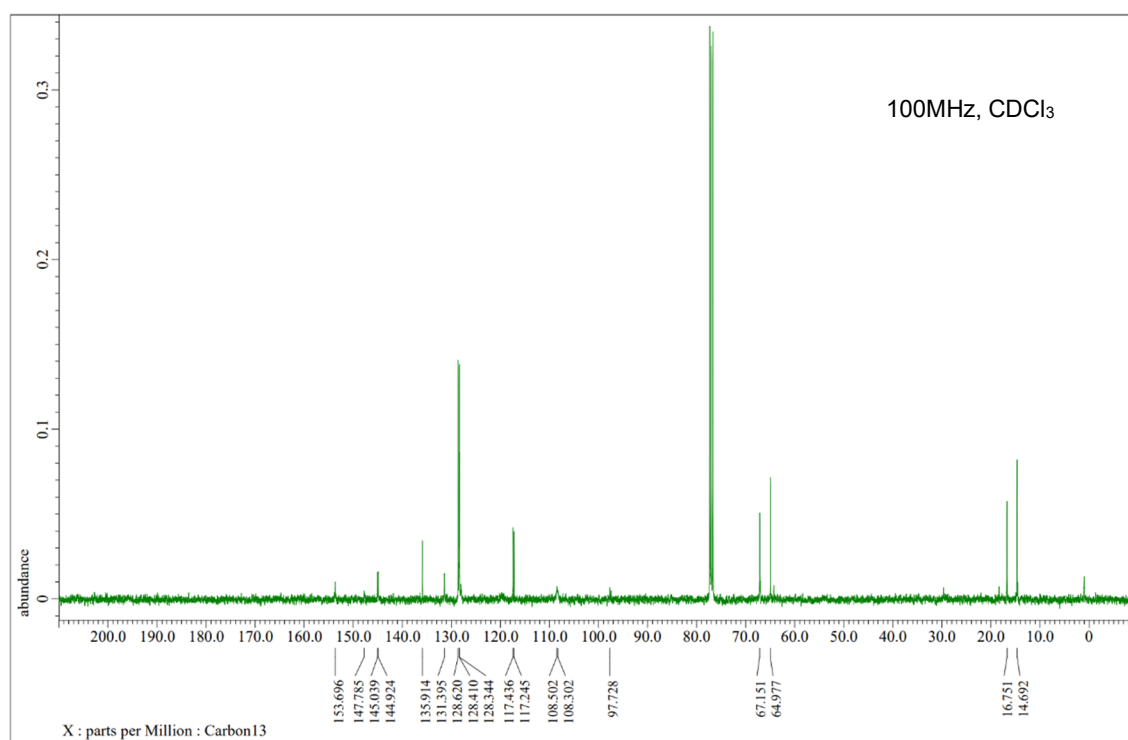

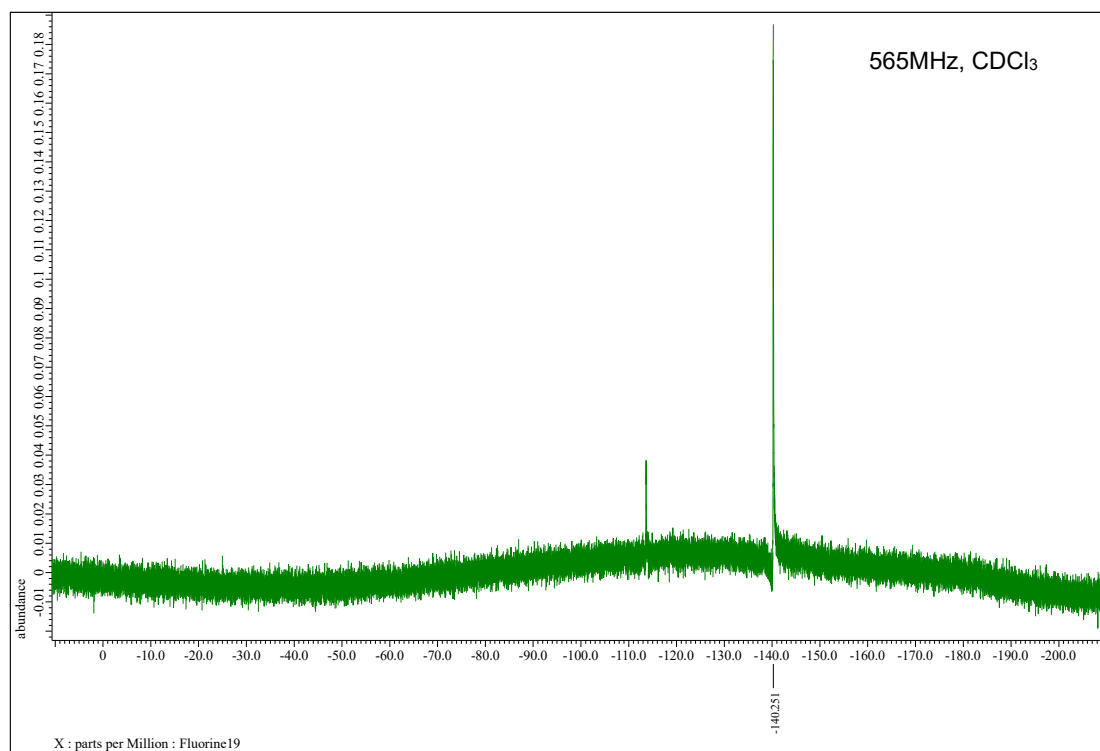

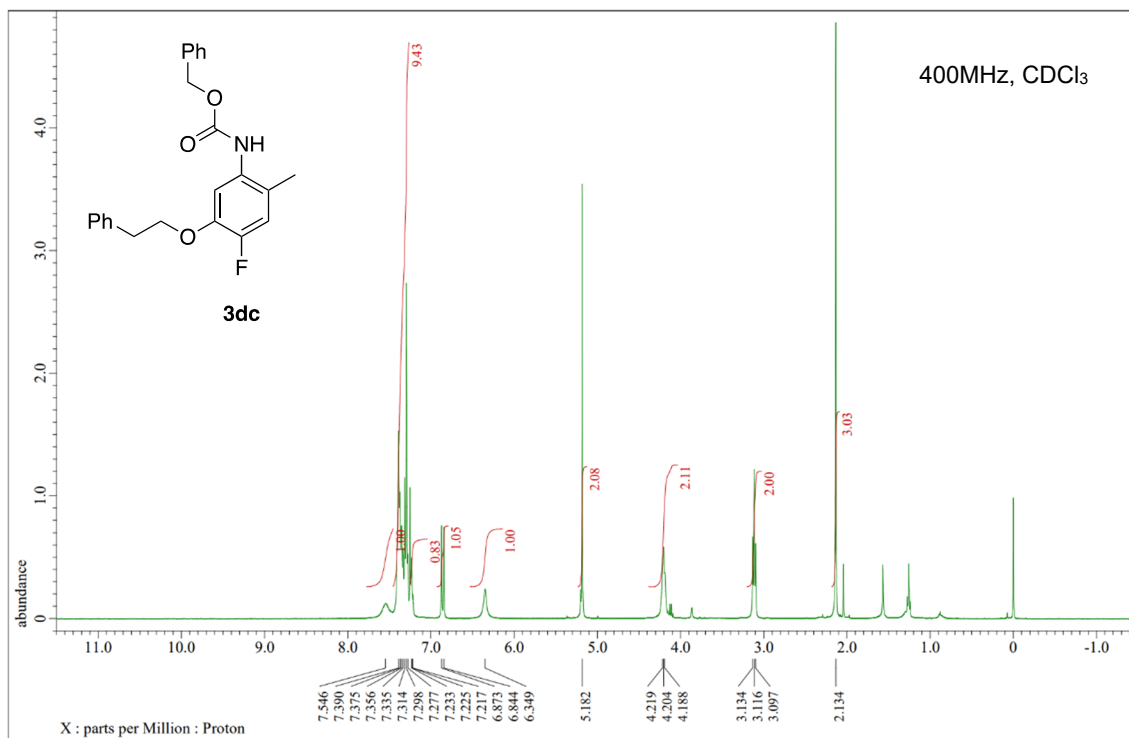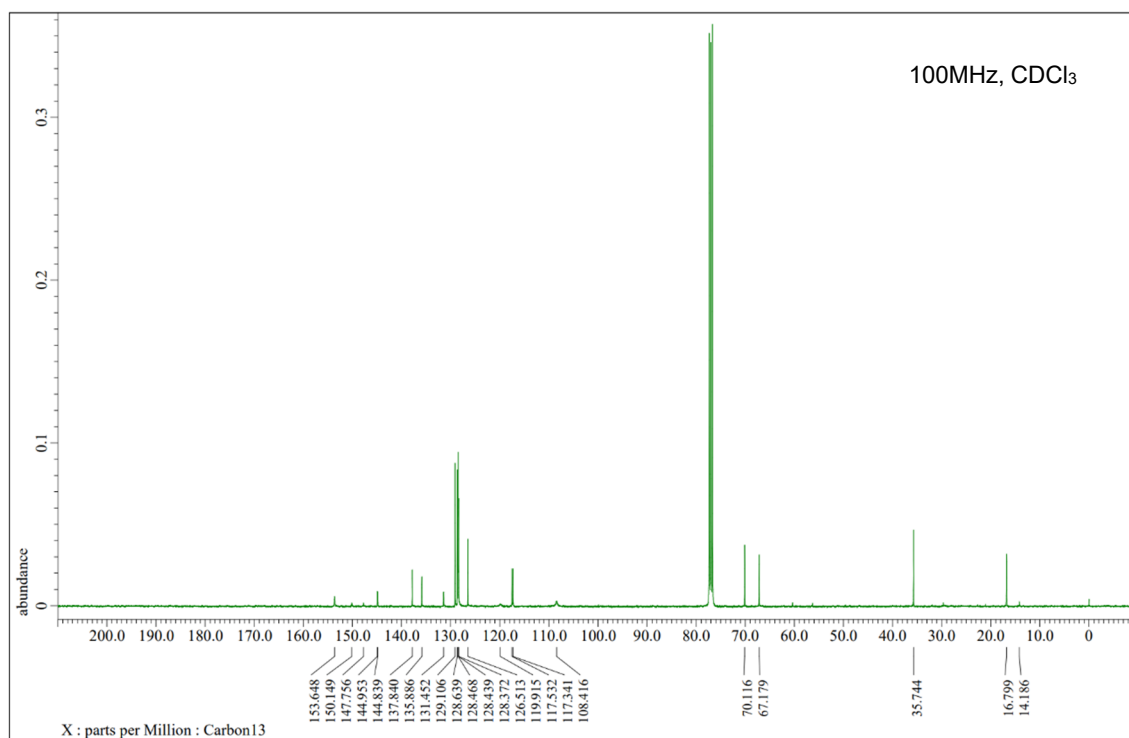

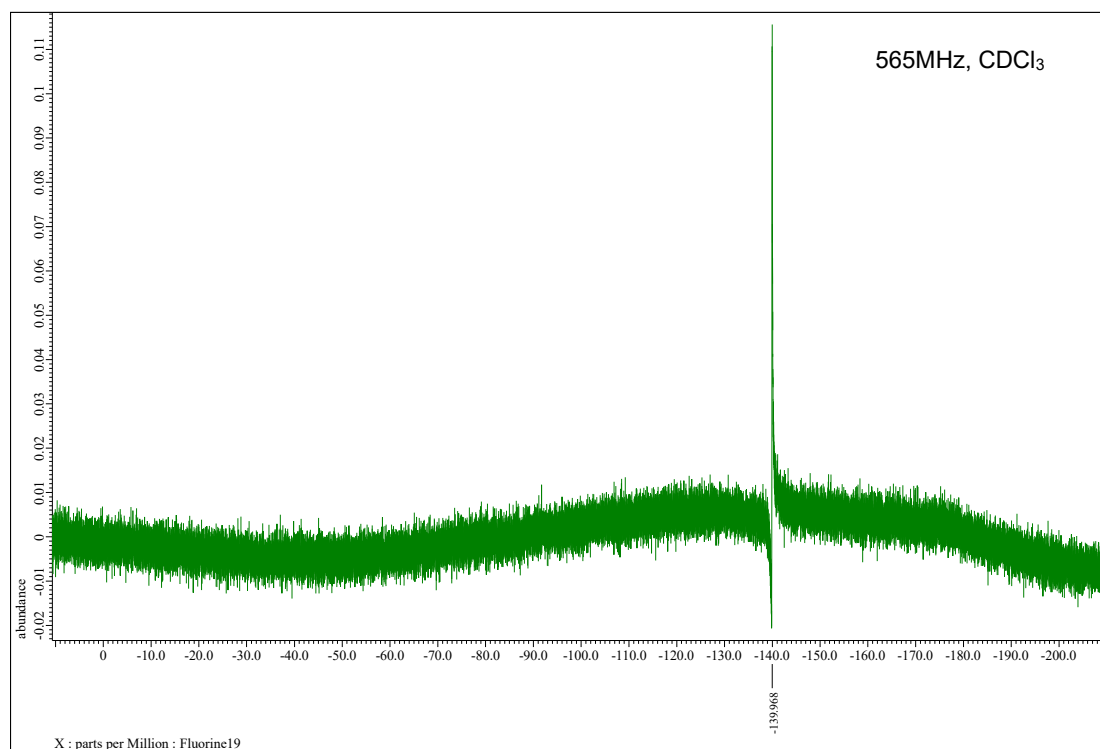

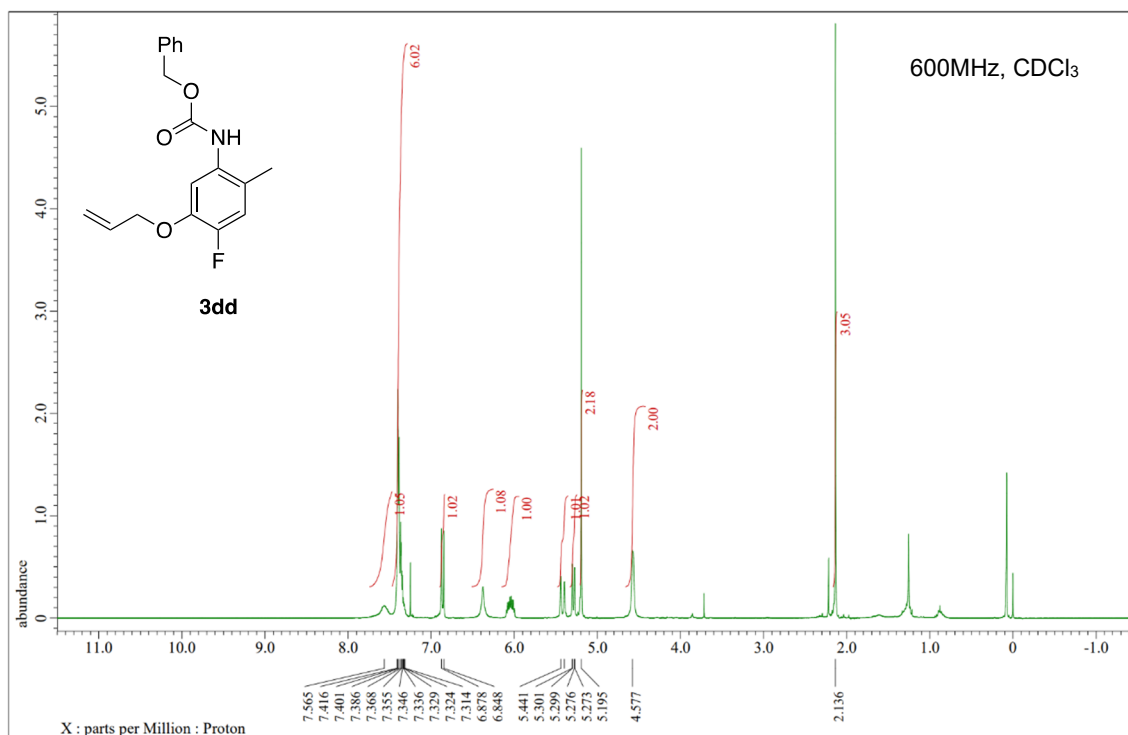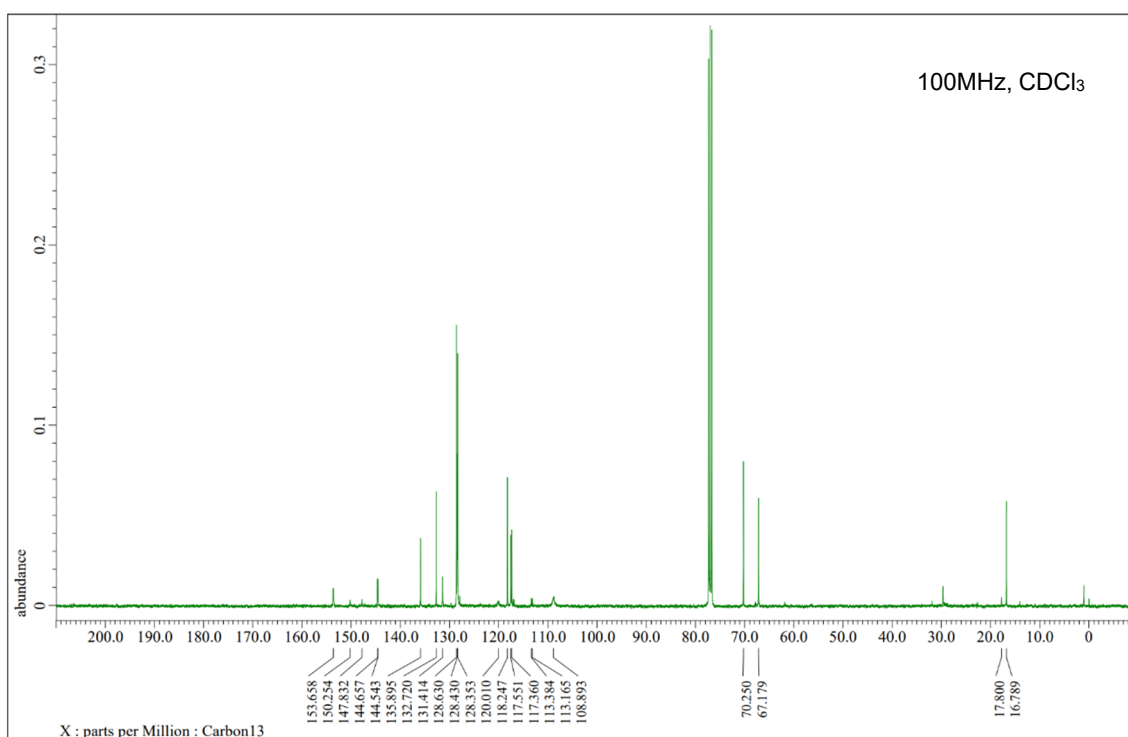

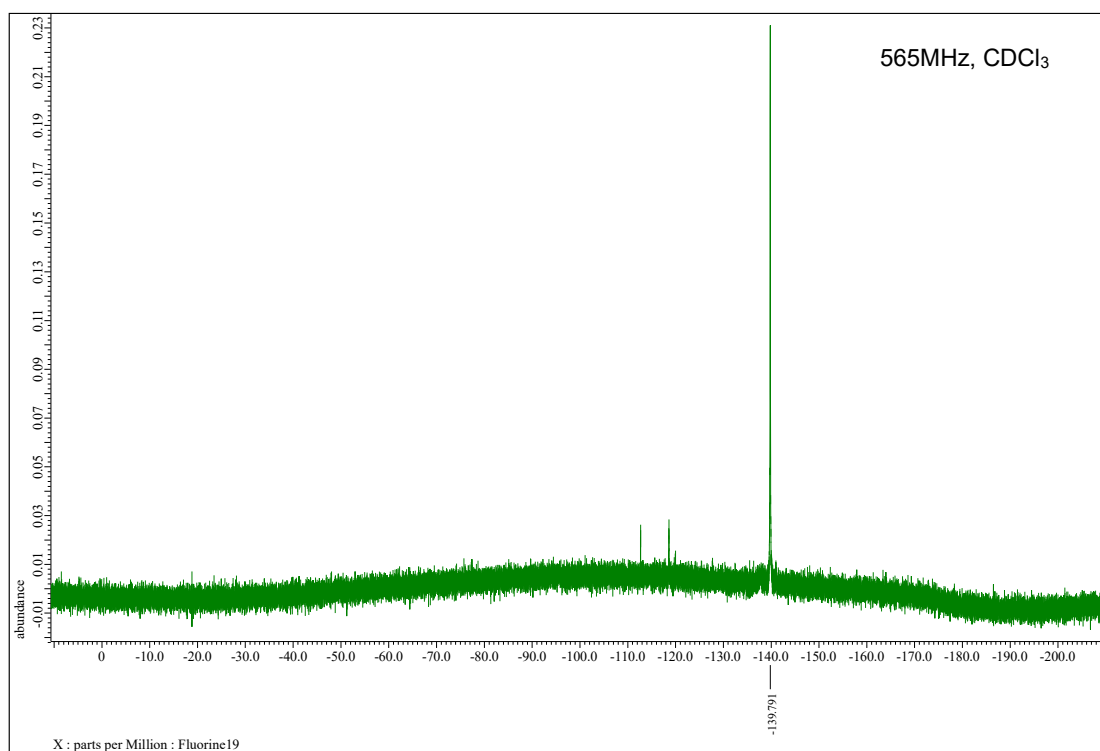

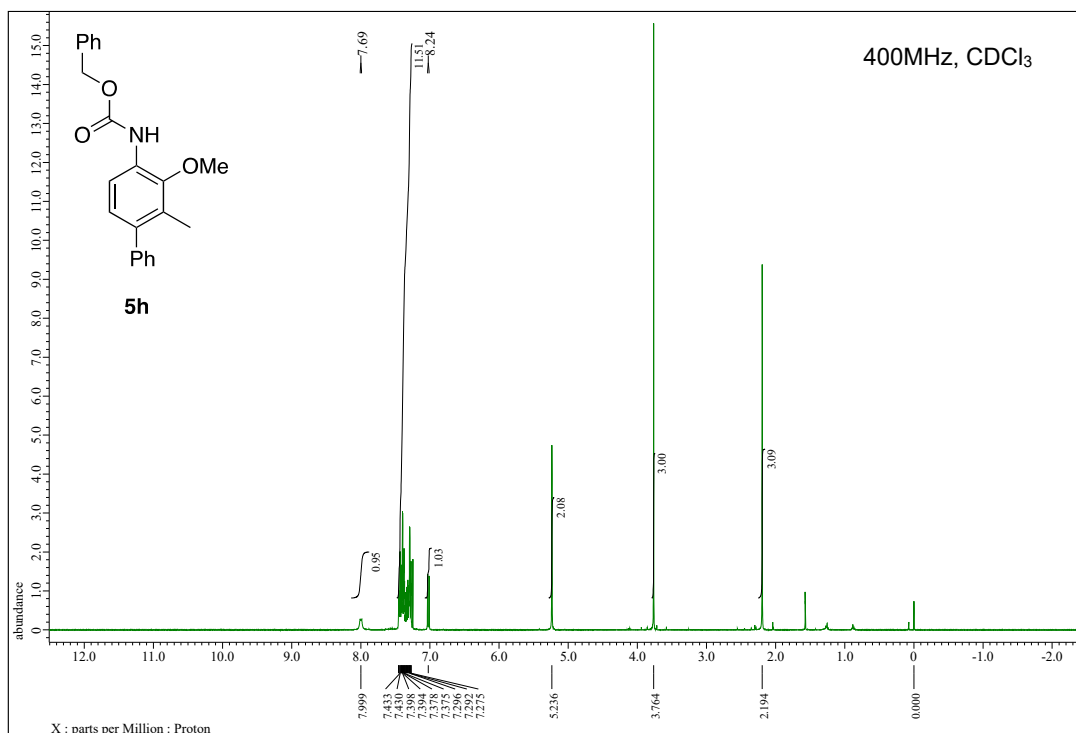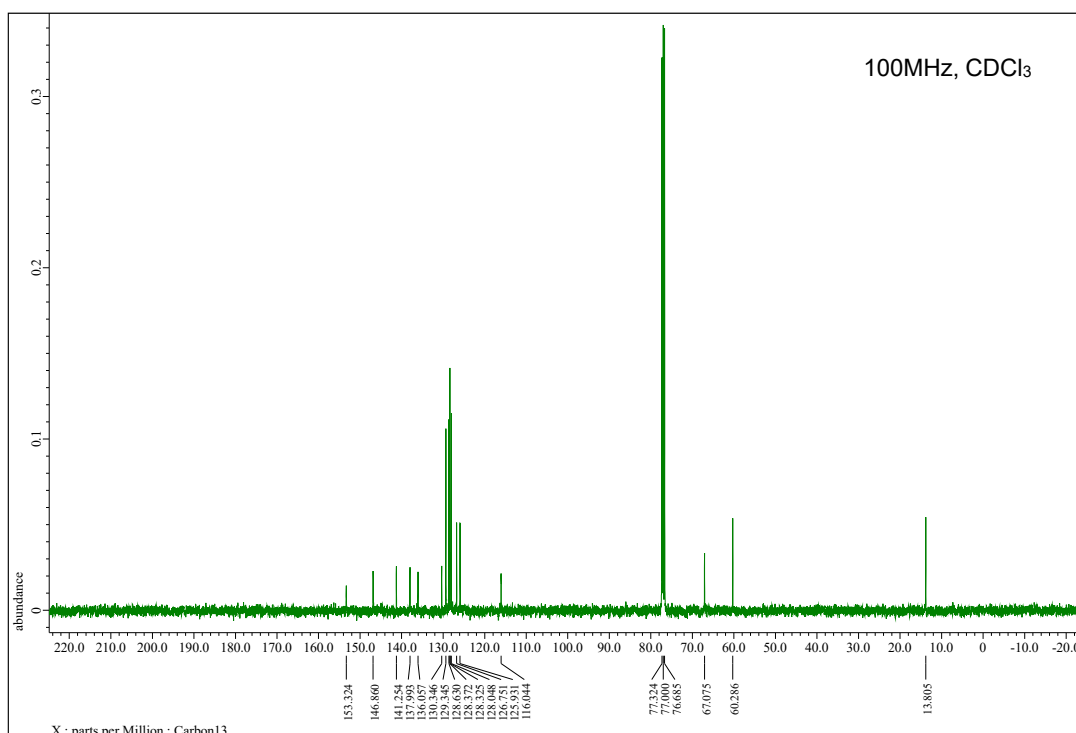

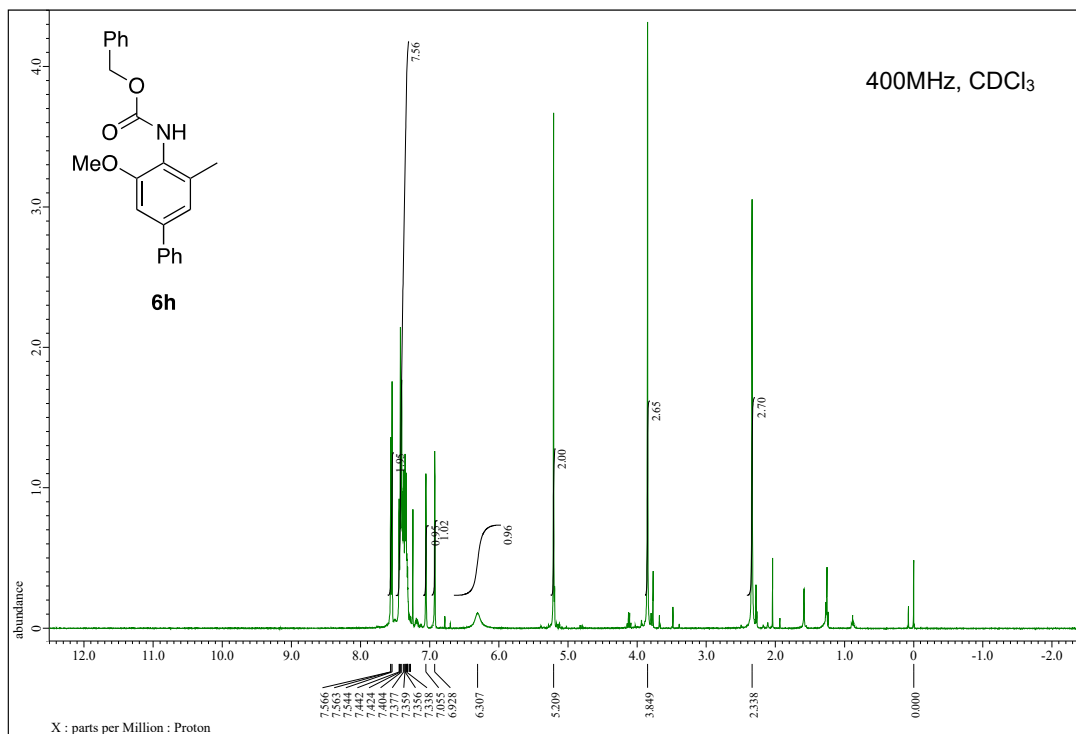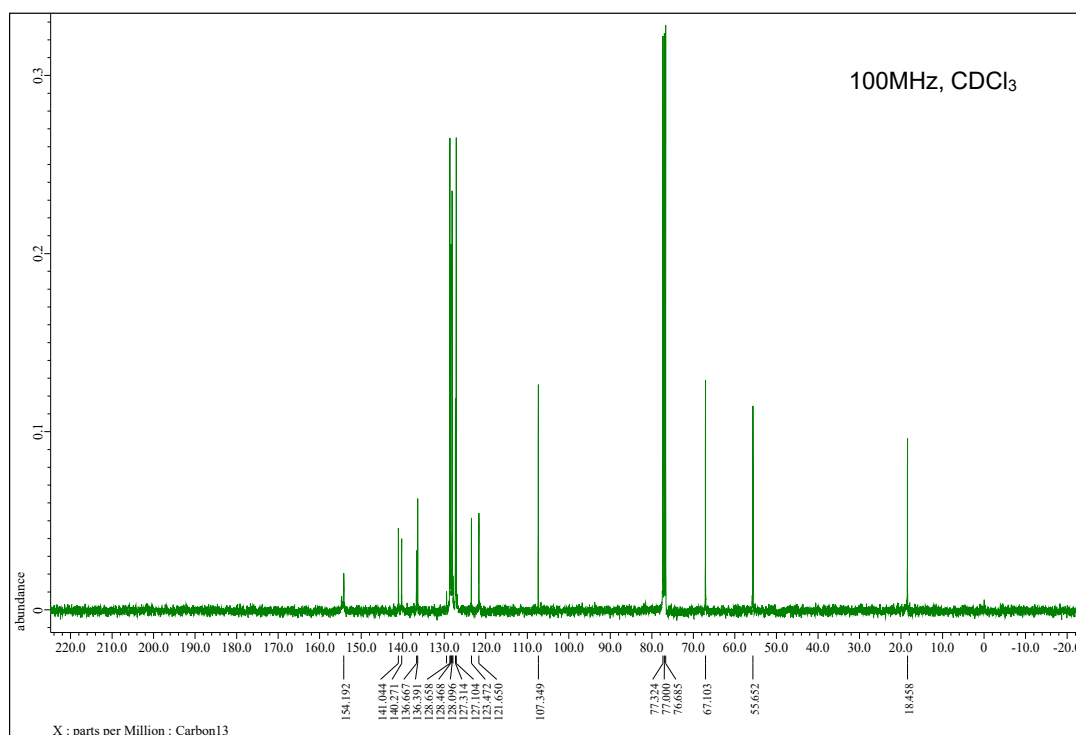

Supplement: s1 [file s1]
